# Supplementary material for: Physcomitrium patens Infection by Colletotrichum gloeosporioides: Understanding the Fungal–Bryophyte Interaction by Microscopy, Phenomics and RNA Sequencing
Source: MDPI journal article supplement (doi:10.3390/jof7080677), 2021-08-22
Supplement: s1 [file s1]

**Supporting Information Table S1:** Complete list of upregulated genes in *Physcomitrium patens* during infection by *Colletotrichum gloeosporioides*.

| Sequence ID  | logFC | FDR       | Description                                |
|--------------|-------|-----------|--------------------------------------------|
| Pp3c21_7680  | 8.40  | 1.50e-23  | phenylalanine ammonia-lyase-like           |
| Pp3c2_32410  | 8.19  | 4.58e-41  | phenylalanine ammonia-lyase-like           |
| Pp3c21_7670  | 8.18  | 1.18e-20  | phenylalanine ammonia-lyase-like           |
|              |       |           | Ribonucleoside-diphosphate reductase       |
| Pp3c2_32330  | 7.87  | 1.12e-37  | large subunit                              |
| Pp3c19_10460 | 7.73  | 1.63e-39  | ---NA---                                   |
| Pp3c27_3700  | 7.15  | 3.27e-40  | hypothetical protein PHYPA_000021          |
| Pp3c19_13690 | 7.04  | 5.45e-35  | phenylalanine ammonia-lyase-like           |
|              |       |           | ADP-ribosylation factor GTPase-activating  |
| Pp3c7_1110   | 6.98  | 3.63e-50  | protein AGD1                               |
| Pp3c1_28050  | 6.98  | 5.12e-09  | hypothetical protein PHYPA_011054          |
|              |       |           | TNF receptor-associated factor homolog 1a- |
| Pp3c7_1150   | 6.97  | 7.32e-50  | like isoform X1                            |
| Pp3c24_13090 | 6.84  | 6.54e-14  | U-box domain-containing protein 6-like     |
| Pp3c11_25660 | 6.77  | 3.11e-25  | uncharacterized protein LOC112284596       |
| Pp3c2_36540  | 6.76  | 4.83e-70  | E3 ubiquitin-protein ligase RNF14          |
| Pp3c13_9000  | 6.73  | 3.00e-226 | phenylalanine ammonia-lyase-like           |
| Pp3c2_30610  | 6.67  | 7.51e-157 | phenylalanine ammonia-lyase-like           |
|              |       |           | ANION TRANSPORTER 3,                       |
| Pp3c12_8070  | 6.66  | 5.89e-79  | CHLOROPLASTIC-RELATED                      |
| Pp3c2_36410  | 6.66  | 3.90e-70  | hypothetical protein PHYPA_008387          |
| Pp3c2_36290  | 6.66  | 7.84e-69  | hypothetical protein PHYPA_022281, partial |
|              |       |           | proline-, glutamic acid- and leucine-rich  |
| Pp3c4_16570  | 6.63  | 1.42e-41  | protein 1 isoform X4                       |
| Pp3c2_36170  | 6.61  | 5.28e-128 | protein COP1 SUPPRESSOR 2-like             |
| Pp3c2_32320  | 6.61  | 7.92e-44  | protein HGH1 homolog                       |
|              |       |           | afadin- and alpha-actinin-binding protein- |
| Pp3c22_15350 | 6.59  | 4.00e-50  | like isoform X1                            |
|              |       |           | 1-acyl-sn-glycerol-3-phosphate             |
| Pp3c2_36440  | 6.57  | 9.82e-169 | acyltransferase 2                          |
| Pp3c2_36350  | 6.56  | 7.85e-61  | elicitor-responsive protein 3-like         |
| Pp3c16_630   | 6.50  | 2.39e-248 | SAC3 family protein C isoform X1           |
| Pp3c12_9140  | 6.43  | 6.58e-104 | hypothetical protein PHYPA_019779          |
| Pp3c19_13170 | 6.41  | 5.15e-182 | hypothetical protein PHYPA_025245          |
|              |       |           | ethylene-responsive transcription factor   |
| Pp3c2_32400  | 6.39  | 8.19e-60  | RAP2-11-like                               |
| Pp3c1_18830  | 6.37  | 3.04e-185 | phenylalanine ammonia-lyase-like           |
| Pp3c1_18680  | 6.35  | 1.28e-169 | ---NA---                                   |
| Pp3c1_18940  | 6.33  | 3.22e-176 | phenylalanine ammonia-lyase-like           |
| Pp3c6_6610   | 6.28  | 7.14e-18  | filaggrin-like isoform X1                  |
|              |       |           | probable leucine-rich repeat receptor-like |
| Pp3c3_21190  | 6.22  | 6.62e-61  | protein kinase At1g68400                   |
|              |       |           | polygalacturonate 4-alpha-                 |
| Pp3c6_6560   | 6.19  | 1.45e-18  | galacturonosyltransferase                  |

|              |      |           |                                                                                        |
|--------------|------|-----------|----------------------------------------------------------------------------------------|
| Pp3c19_6250  | 6.19 | 2.28e-66  | Rubredoxin 1                                                                           |
| Pp3c19_6320  | 6.16 | 7.95e-189 | aromatic aminotransferase ISS1-like                                                    |
| Pp3c24_18010 | 6.15 | 6.05e-191 | hypothetical protein PHYPA_018527                                                      |
| Pp3c19_6240  | 6.14 | 3.89e-169 | uncharacterized protein LOC112273189                                                   |
| Pp3c18_17330 | 6.13 | 7.70e-49  | probable protein S-acyltransferase 22                                                  |
| Pp3c14_22890 | 6.12 | 1.49e-190 | hypothetical protein PHYPA_016993                                                      |
| Pp3c24_18000 | 6.11 | 7.31e-176 | Transposon TX1 uncharacterized                                                         |
| Pp3c19_6330  | 6.10 | 5.48e-169 | ent-kaurene oxidase-like 3                                                             |
| Pp3c11_2950  | 6.07 | 1.93e-203 | TPR repeat-containing protein                                                          |
| Pp3c19_9000  | 6.00 | 7.42e-182 | isoleucine--tRNA ligase,<br>chloroplastic/mitochondrial                                |
| Pp3c3_27000  | 5.94 | 2.73e-78  | inactive poly [ADP-ribose] polymerase<br>RCD1-like isoform X1                          |
| Pp3c1_28020  | 5.94 | 6.72e-10  | probable inactive purple acid phosphatase<br>27                                        |
| Pp3c2_30370  | 5.88 | 2.49e-127 | nucleolar and coiled-body phosphoprotein<br>1-like                                     |
| Pp3c3_6500   | 5.85 | 4.84e-13  | mitogen-activated protein kinase kinase<br>kinase NPK1-like                            |
| Pp3c2_30620  | 5.78 | 1.28e-141 | nucleosome assembly protein 1;3-like<br>isoform X5                                     |
| Pp3c8_4130   | 5.72 | 1.81e-51  | pyruvate dehydrogenase E1 component<br>subunit alpha-3, chloroplastic                  |
| Pp3c24_2840  | 5.71 | 2.79e-67  | uncharacterized aarF domain-containing<br>protein kinase At1g79600, chloroplastic-like |
| Pp3c22_10130 | 5.70 | 9.65e-147 | Holo-ACP Synthase                                                                      |
| Pp3c23_940   | 5.67 | 6.68e-15  | 187-kDa microtubule-associated protein<br>AIR9-like                                    |
| Pp3c10_21310 | 5.67 | 1.45e-108 | serine protease inhibitor, Kazal-type family<br>protein                                |
| Pp3c21_16620 | 5.62 | 9.45e-82  | hypothetical protein PHYPA_030933                                                      |
| Pp3c6_4000   | 5.61 | 2.97e-43  | conserved oligomeric Golgi complex<br>subunit 4                                        |
| Pp3c21_20650 | 5.61 | 1.49e-130 | hypothetical protein PHYPA_031097                                                      |
| Pp3c13_24240 | 5.55 | 1.62e-120 | choline-phosphate cytidylyltransferase 2-<br>like                                      |
| Pp3c7_22740  | 5.54 | 9.23e-52  | DEAD-box ATP-dependent RNA helicase<br>46                                              |
| Pp3c12_25330 | 5.53 | 6.33e-27  | probable sodium/metabolite cotransporter<br>BASS1, chloroplastic                       |
| Pp3c13_17510 | 5.46 | 2.03e-16  | UDP-arabinopyranose mutase 2-like                                                      |
| Pp3c17_10090 | 5.38 | 3.71e-10  | Regulator of rDNA transcription protein 15                                             |
| Pp3c17_21250 | 5.34 | 6.47e-27  | uncharacterized protein LOC112279540<br>isoform X3                                     |
| Pp3c13_17480 | 5.32 | 4.90e-16  | hypothetical protein PHYPA_020162                                                      |
| Pp3c12_11940 | 5.28 | 3.70e-60  | bZIP transcription factor 60-like                                                      |
| Pp3c13_17633 | 5.27 | 8.98e-14  | beta-mannosyltransferase 1                                                             |
| Pp3c17_10120 | 5.27 | 1.42e-12  | hypothetical protein PHYPA_023918                                                      |

|              |      |           |                                                                                         |
|--------------|------|-----------|-----------------------------------------------------------------------------------------|
| Pp3c17_21300 | 5.25 | 3.74e-24  | hypothetical protein PHYPA_004729<br>hybrid signal transduction histidine kinase        |
| Pp3c4_23930  | 5.24 | 2.22e-78  | K-like                                                                                  |
| Pp3c2_29800  | 5.24 | 7.21e-175 | uncharacterized protein LOC112283113                                                    |
| Pp3c17_21180 | 5.23 | 6.27e-23  | putative methyltransferase domain protein<br>NADH dehydrogenase [ubiquinone] iron-      |
| Pp3c20_18690 | 5.22 | 4.96e-116 | sulfur protein 6, mitochondrial<br>zinc finger CCCH domain-containing                   |
| Pp3c12_6960  | 5.21 | 1.60e-50  | protein 19-like                                                                         |
| Pp3c17_21150 | 5.17 | 4.80e-22  | hypothetical protein PHYPA_004720                                                       |
| Pp3c2_35740  | 5.17 | 1.13e-137 | uncharacterized protein LOC112283107                                                    |
| Pp3c3_18090  | 5.16 | 9.94e-14  | hypothetical protein PHYPA_029859                                                       |
| Pp3c19_13030 | 5.14 | 9.41e-84  | hypothetical protein PHYPA_025239                                                       |
| Pp3c18_4480  | 5.09 | 2.54e-143 | auxin transporter-like protein 2 isoform X1                                             |
| Pp3c13_17813 | 5.08 | 3.65e-15  | protein FAR1-RELATED SEQUENCE 5-like<br>probable 18S rRNA (guanine-N(7))-               |
| Pp3c2_27270  | 4.93 | 9.71e-151 | methyltransferase                                                                       |
| Pp3c17_3860  | 4.93 | 3.01e-10  | transcription factor TCP15-like                                                         |
| Pp3c17_14850 | 4.89 | 4.60e-120 | hypothetical protein PHYPA_004408, partial<br>protein trichome birefringence-like 11    |
| Pp3c3_19730  | 4.89 | 2.90e-13  | isoform X1                                                                              |
| Pp3c19_21220 | 4.87 | 3.64e-78  | hypothetical protein PHYPA_024481<br>peptidyl-prolyl cis-trans isomerase CYP40-         |
| Pp3c10_25030 | 4.87 | 2.44e-26  | like                                                                                    |
| Pp3c16_6800  | 4.85 | 2.40e-55  | cell number regulator 8-like isoform X2                                                 |
| Pp3c12_7050  | 4.85 | 1.03e-48  | hypothetical protein PHYPA_019159                                                       |
| Pp3c26_2420  | 4.83 | 3.04e-91  | phenylalanine ammonia-lyase-like<br>Ubiquitin and WLM domain-containing                 |
| Pp3c19_6660  | 4.78 | 4.66e-78  | protein C1442.07c, putative                                                             |
| Pp3c11_21367 | 4.77 | 5.51e-05  | hypothetical protein PHYPA_005580, partial<br>squamosa promoter-binding-like protein 15 |
| Pp3c17_5320  | 4.77 | 1.50e-117 | isoform X4<br>Retrovirus-related Pol polyprotein from                                   |
| Pp3c20_18520 | 4.74 | 1.12e-08  | transposon TNT 1-94                                                                     |
| Pp3c6_2730   | 4.73 | 2.30e-59  | transcription factor bHLH66 isoform X1<br>enoyl-[acyl-carrier-protein] reductase,       |
| Pp3c22_14800 | 4.71 | 3.42e-46  | mitochondrial<br>serine/arginine repetitive matrix protein 2-                           |
| Pp3c27_4100  | 4.71 | 1.17e-35  | like isoform X1<br>phosphoribosylamine--glycine ligase,                                 |
| Pp3c6_1770   | 4.70 | 8.37e-21  | chloroplastic                                                                           |
| Pp3c13_24020 | 4.69 | 3.55e-46  | proline-rich protein PRCC                                                               |
| Pp3c23_11380 | 4.68 | 1.22e-117 | hypothetical protein PHYPA_015014                                                       |
| Pp3c1_16900  | 4.66 | 1.23e-109 | hypothetical protein PHYPA_018185                                                       |
| Pp3c12_18710 | 4.65 | 8.06e-51  | ALA-interacting subunit 3                                                               |
| Pp3c11_14690 | 4.64 | 4.36e-102 | hypothetical protein PHYPA_005683<br>sister chromatid cohesion protein PDS5             |
| Pp3c5_1740   | 4.64 | 9.67e-75  | homolog A                                                                               |

|              |      |           |                                             |
|--------------|------|-----------|---------------------------------------------|
| Pp3c18_1530  | 4.60 | 2.01e-75  | homeobox protein prospero-like isoform X1   |
| Pp3c13_12560 | 4.60 | 2.89e-09  | protein NRT1/ PTR FAMILY 8.1-like           |
| Pp3c8_16520  | 4.55 | 5.27e-60  | hypothetical protein PHYPA_012862, partial  |
| Pp3c3_8160   | 4.55 | 1.66e-85  | hypothetical protein PHYPA_022795           |
| Pp3c2_37330  | 4.53 | 3.54e-47  | transmembrane protein 256 homolog           |
| Pp3c3_6540   | 4.52 | 9.24e-126 | hypothetical protein PHYPA_022747           |
|              |      |           | magnesium chelatase subunit of              |
| Pp3c20_16410 | 4.52 | 1.77e-51  | protochlorophyllide reductase (chloroplast) |
| Pp3c13_14480 | 4.51 | 1.11e-249 | predicted protein                           |
| Pp3c7_13100  | 4.51 | 1.11e-18  | serine/threonine-protein kinase HT1         |
| Pp3c3_8120   | 4.50 | 5.31e-79  | lipase 1-like isoform X2                    |
|              |      |           | carbamoyl-phosphate synthase small chain,   |
| Pp3c12_2640  | 4.47 | 4.76e-92  | chloroplastic                               |
|              |      |           | mitochondrial arginine transporter BAC2-    |
| Pp3c3_8080   | 4.47 | 2.36e-79  | like                                        |
|              |      |           | probable aspartyl aminopeptidase isoform    |
| Pp3c16_23390 | 4.47 | 6.23e-50  | X1                                          |
| Pp3c5_15640  | 4.47 | 1.02e-223 | ribonuclease H2 subunit B                   |
|              |      |           | truncated basic helix-loop-helix protein A- |
| Pp3c23_21700 | 4.47 | 1.55e-21  | like                                        |
| Pp3c18_1550  | 4.46 | 1.26e-32  | probable pectinesterase 53                  |
| Pp3c15_19310 | 4.46 | 2.86e-42  | Protein ROS1                                |
|              |      |           | calmodulin-binding receptor-like            |
| Pp3c27_3620  | 4.39 | 2.89e-65  | cytoplasmic kinase 2 isoform X4             |
|              |      |           | histone-lysine N-methyltransferase ATXR6-   |
| Pp3c7_19630  | 4.38 | 3.93e-53  | like                                        |
| Pp3c7_17000  | 4.38 | 8.40e-40  | transcription factor MYB21-like             |
|              |      |           | dual-specificity tyrosine-(Y)-              |
| Pp3c3_14160  | 4.35 | 1.27e-51  | phosphorylation regulated kinase            |
| Pp3c10_15520 | 4.35 | 1.18e-115 | ---NA---                                    |
| Pp3c4_27720  | 4.35 | 1.11e-38  | phosphoenolpyruvate carboxylase 2           |
| Pp3c21_2960  | 4.33 | 1.71e-95  | protein TIFY 6a-like                        |
|              |      |           | uncharacterized protein YEL023C-like        |
| Pp3c4_24020  | 4.32 | 1.78e-28  | isoform X1                                  |
|              |      |           | 110 kDa U5 small nuclear ribonucleoprotein  |
| Pp3c21_7830  | 4.31 | 3.20e-79  | component CLO-like                          |
|              |      |           | preprotein translocase subunit SCY1,        |
| Pp3c4_25770  | 4.31 | 4.66e-100 | chloroplastic                               |
|              |      |           | NADH dehydrogenase ubiquinone 1 alpha       |
|              |      |           | subcomplex assembly factor-like protein     |
| Pp3c2_24900  | 4.30 | 1.64e-27  | (DUF498/DUF598)                             |
|              |      |           | heavy metal-associated isoprenylated plant  |
| Pp3c18_21960 | 4.28 | 3.30e-95  | protein 30-like                             |
| Pp3c8_25020  | 4.28 | 3.50e-16  | proteasome subunit beta type-2-A            |
|              |      |           | probable E3 ubiquitin-protein ligase        |
| Pp3c10_17120 | 4.27 | 8.61e-59  | XBOS32 isoform X1                           |
| Pp3c4_17790  | 4.26 | 6.44e-47  | carbonic anhydrase, chloroplastic-like      |
| Pp3c1_7800   | 4.26 | 1.16e-88  | protein DA1-related 1-like                  |

|              |      |           |                                               |
|--------------|------|-----------|-----------------------------------------------|
| Pp3c6_6330   | 4.22 | 2.64e-224 | 60S ribosomal protein L15                     |
| Pp3c5_10720  | 4.19 | 2.25e-105 | clathrin interactor 1-like                    |
| Pp3c2_24761  | 4.19 | 8.32e-92  | hypothetical protein PHYPA_015829             |
| Pp3c1_23380  | 4.18 | 2.01e-31  | calphotin-like isoform X1                     |
| Pp3c19_17320 | 4.18 | 6.45e-14  | dormancy/auxin associated-like protein        |
| Pp3c26_4070  | 4.18 | 1.69e-63  | hypothetical protein PHYPA_000911             |
| Pp3c7_20170  | 4.17 | 2.97e-43  | hypothetical protein PHYPA_029087             |
| Pp3c19_18700 | 4.15 | 1.59e-80  | 30S ribosomal protein S21, chloroplastic-like |
| Pp3c19_6710  | 4.15 | 1.24e-61  | disease resistance protein TAO1-like          |
| Pp3c3_16960  | 4.15 | 8.36e-30  | hypothetical protein PHYPA_029799             |
| Pp3c12_7720  | 4.11 | 2.04e-23  | BI1-like protein                              |
| Pp3c10_23730 | 4.09 | 1.36e-51  | auxin-responsive protein SAUR72-like          |
| Pp3c1_13930  | 4.08 | 1.54e-106 | uncharacterized protein LOC112291597          |
| Pp3c23_5150  | 4.07 | 4.33e-51  | beta-glucosidase 4                            |
| Pp3c14_3390  | 4.07 | 8.83e-61  | hypothetical protein PHYPA_002494             |
|              |      |           | fibronectin type-III domain-containing        |
| Pp3c5_5670   | 4.06 | 2.39e-18  | protein 3a isoform X2                         |
| Pp3c8_22400  | 4.05 | 1.08e-117 | superoxide dismutase [Cu-Zn]-like             |
| Pp3c26_3030  | 4.03 | 1.16e-54  | hypothetical protein PHYPA_000862             |
| Pp3c2_17270  | 4.02 | 8.93e-28  | calcium-dependent protein kinase 26-like      |
| Pp3c25_10190 | 4.00 | 3.10e-94  | dnaJ homolog subfamily C member 2-like        |
|              |      |           | protein MOTHER of FT and TFL1-like            |
| Pp3c14_11550 | 4.00 | 1.53e-84  | isoform X1                                    |
|              |      |           | protein PECTIC ARABINOGALACTAN                |
| Pp3c2_25760  | 4.00 | 3.54e-17  | SYNTHESIS-RELATED-like isoform X1             |
|              |      |           | ERAD-associated E3 ubiquitin-protein          |
| Pp3c16_18830 | 3.97 | 1.91e-104 | ligase component HRD3A                        |
| Pp3c8_5110   | 3.97 | 4.72e-29  | Zinc transport protein like                   |
|              |      |           | regulation of nuclear pre-mRNA domain-        |
| Pp3c24_16410 | 3.96 | 6.73e-41  | containing protein 1B-like                    |
|              |      |           | guanine nucleotide exchange factor SPIKE      |
| Pp3c26_8040  | 3.95 | 1.65e-69  | 1-like isoform X1                             |
| Pp3c26_4770  | 3.95 | 2.85e-35  | YTH domain-containing protein 1-like          |
| Pp3c23_10130 | 3.94 | 3.04e-50  | coatomer subunit alpha-1                      |
| Pp3c22_12740 | 3.94 | 1.65e-74  | hypothetical protein PHYPA_007965             |
|              |      |           | 3-dehydrosphinganine reductase TSC10A-        |
| Pp3c7_25930  | 3.93 | 1.13e-80  | like                                          |
|              |      |           | DNA/pantothenate metabolism                   |
| Pp3c11_25880 | 3.93 | 3.26e-134 | flavoprotein, C-terminal                      |
|              |      |           | uncharacterized protein LOC112288668          |
| Pp3c23_14050 | 3.92 | 5.11e-05  | isoform X3                                    |
| Pp3c1_19060  | 3.90 | 4.04e-75  | transmembrane protein, putative               |
| Pp3c15_23190 | 3.89 | 7.06e-09  | ---NA---                                      |
| Pp3c23_17280 | 3.88 | 6.39e-32  | protein SCAI-like isoform X1                  |
| Pp3c24_19980 | 3.88 | 4.53e-26  | transcription factor HEC2                     |
| Pp3c19_17300 | 3.86 | 6.06e-56  | tubby-like F-box protein 3 isoform X1         |
|              |      |           | glycerol-3-phosphate dehydrogenase            |
| Pp3c26_13490 | 3.85 | 2.26e-56  | [NAD(+)] 2, chloroplastic isoform X1          |

|              |      |           |                                                                                     |
|--------------|------|-----------|-------------------------------------------------------------------------------------|
| Pp3c6_520    | 3.85 | 6.14e-27  | kinesin-like protein KIN-14I isoform X1<br>probable glycerol-3-phosphate            |
| Pp3c7_22440  | 3.85 | 3.10e-15  | dehydrogenase [NAD(+)] 2, cytosolic<br>ribulose biphosphate carboxylase small       |
| Pp3c17_1970  | 3.85 | 6.25e-33  | chain clone 512-like                                                                |
| Pp3c16_6520  | 3.84 | 2.29e-57  | hypothetical protein PHYPA_023730                                                   |
| Pp3c12_9940  | 3.83 | 2.01e-24  | hypothetical protein PHYPA_019808                                                   |
| Pp3c7_250    | 3.80 | 5.84e-50  | beach domain-containing protein<br>eukaryotic translation initiation factor 3       |
| Pp3c3_32210  | 3.79 | 1.83e-47  | subunit K<br>rab3 GTPase-activating protein catalytic                               |
| Pp3c7_14010  | 3.79 | 7.89e-19  | subunit                                                                             |
| Pp3c26_4220  | 3.78 | 3.26e-71  | F-box/kelch-repeat protein At1g15670-like                                           |
| Pp3c15_10550 | 3.75 | 5.27e-33  | hypothetical protein PHYPA_002854                                                   |
| Pp3c3_10280  | 3.75 | 5.16e-36  | probable protein phosphatase 2C 22<br>Retrovirus-related Pol polyprotein from       |
| Pp3c12_19430 | 3.75 | 8.13e-178 | transposon RE1<br>uncharacterized oxidoreductase At4g09670-                         |
| Pp3c19_9970  | 3.75 | 2.71e-66  | like                                                                                |
| Pp3c22_16360 | 3.74 | 3.37e-35  | auxin-responsive protein SAUR72-like                                                |
| Pp3c10_5660  | 3.74 | 1.26e-62  | caltractin                                                                          |
| Pp3c15_15960 | 3.73 | 1.21e-17  | importin-11 isoform X1                                                              |
| Pp3c5_880    | 3.73 | 3.86e-30  | WD repeat-containing protein LWD1                                                   |
| Pp3c15_16100 | 3.72 | 7.22e-58  | hypothetical protein PHYPA_003086<br>phospho-2-dehydro-3-deoxyheptonate             |
| Pp3c23_9170  | 3.72 | 2.04e-35  | aldolase 2, chloroplastic-like                                                      |
| Pp3c15_5450  | 3.70 | 3.39e-21  | sorting nexin 2A-like                                                               |
| Pp3c8_24690  | 3.70 | 9.93e-21  | uncharacterized protein LOC112287004                                                |
| Pp3c6_9060   | 3.69 | 1.93e-63  | protein FAM63B-like                                                                 |
| Pp3c6_11170  | 3.67 | 8.65e-33  | hypothetical protein PHYPA_027418                                                   |
| Pp3c27_8590  | 3.67 | 3.57e-21  | tobamovirus multiplication protein 3-like                                           |
| Pp3c10_9790  | 3.67 | 4.32e-22  | uncharacterized protein LOC112280954                                                |
| Pp3c18_11980 | 3.66 | 4.12e-24  | 3-ketoacyl-CoA thiolase 2, peroxisomal                                              |
| Pp3c8_3600   | 3.66 | 2.80e-101 | hypothetical protein PHYPA_012297<br>serine/arginine-rich SC35-like splicing factor |
| Pp3c21_7310  | 3.66 | 2.71e-30  | SCL30A                                                                              |
| Pp3c10_10860 | 3.66 | 3.37e-111 | uncharacterized protein LOC112278155                                                |
| Pp3c10_24760 | 3.65 | 1.14e-57  | hypothetical protein PHYPA_006195                                                   |
| Pp3c4_14550  | 3.65 | 1.28e-68  | hypothetical protein PHYPA_020925<br>probable copper-transporting ATPase            |
| Pp3c27_1870  | 3.64 | 3.93e-28  | HMA5<br>probable sugar phosphate/phosphate                                          |
| Pp3c12_2240  | 3.64 | 4.51e-18  | translocator At3g11320                                                              |
| Pp3c15_7520  | 3.63 | 1.33e-48  | hypothetical protein PHYPA_003742                                                   |
| Pp3c4_21680  | 3.62 | 6.18e-90  | hypothetical protein PHYPA_021403                                                   |
| Pp3c20_15490 | 3.62 | 3.14e-37  | ---NA---                                                                            |
| Pp3c18_15840 | 3.61 | 5.34e-146 | hypothetical protein PHYPA_005417                                                   |
| Pp3c13_16440 | 3.60 | 2.03e-09  | glycosyltransferase in CAZy family GT78                                             |

|              |      |           |                                                                                        |
|--------------|------|-----------|----------------------------------------------------------------------------------------|
| Pp3c15_6310  | 3.60 | 5.09e-32  | hypothetical protein PHYPA_003691<br>retrovirus-related pol polyprotein from           |
| Pp3c4_5170   | 3.60 | 1.04e-50  | transposon tnt 1-94                                                                    |
| Pp3c17_21600 | 3.57 | 9.12e-30  | hypothetical protein PHYPA_004746                                                      |
| Pp3c1_22560  | 3.56 | 1.12e-70  | hypothetical protein PHYPA_011699                                                      |
| Pp3c19_7630  | 3.56 | 5.54e-90  | hypothetical protein PHYPA_024947                                                      |
| Pp3c13_21030 | 3.55 | 1.19e-30  | enolase 1, chloroplastic<br>threonine--tRNA ligase,                                    |
| Pp3c1_10860  | 3.54 | 1.26e-57  | chloroplastic/mitochondrial 2                                                          |
| Pp3c2_12680  | 3.54 | 6.37e-84  | UBP1-associated protein 2C-like                                                        |
| Pp3c21_16540 | 3.52 | 4.20e-27  | hypothetical protein PHYPA_030929<br>afadin- and alpha-actinin-binding protein-        |
| Pp3c17_22550 | 3.51 | 1.24e-21  | like isoform X1                                                                        |
| Pp3c2_1870   | 3.51 | 1.00e-10  | hypothetical protein PHYPA_016564                                                      |
| Pp3c1_24550  | 3.49 | 6.98e-21  | anamorsin homolog                                                                      |
| Pp3c1_34890  | 3.48 | 5.57e-17  | GPI mannosyltransferase 1-like                                                         |
| Pp3c8_18470  | 3.47 | 3.64e-24  | fimbrin-1                                                                              |
| Pp3c12_8440  | 3.47 | 1.89e-136 | hypothetical protein PHYPA_019170, partial<br>vesicle-associated membrane protein 714- |
| Pp3c10_11730 | 3.47 | 3.02e-52  | like<br>DExH-box ATP-dependent RNA helicase                                            |
| Pp3c5_23790  | 3.46 | 6.41e-05  | DExH10                                                                                 |
| Pp3c12_17520 | 3.46 | 1.88e-17  | hypothetical protein PHYPA_009814                                                      |
| Pp3c6_18950  | 3.46 | 4.30e-69  | hypothetical protein PHYPA_026916<br>molybdopterin synthase sulfur carrier             |
| Pp3c7_1960   | 3.46 | 2.34e-13  | subunit                                                                                |
| Pp3c3_24240  | 3.46 | 2.77e-50  | predicted protein                                                                      |
| Pp3c11_10350 | 3.44 | 3.20e-51  | hypothetical protein PHYPA_006610                                                      |
| Pp3c1_32560  | 3.43 | 1.10e-75  | Clathrin, heavy chain                                                                  |
| Pp3c9_3690   | 3.43 | 9.03e-19  | hypothetical protein PHYPA_025859                                                      |
| Pp3c21_20950 | 3.42 | 4.83e-71  | CLPTM1-like membrane protein cnrB                                                      |
| Pp3c1_29970  | 3.41 | 3.47e-55  | Immunoglobulin-like protein                                                            |
| Pp3c18_5000  | 3.40 | 3.01e-23  | ---NA---                                                                               |
| Pp3c21_21000 | 3.40 | 3.18e-65  | predicted protein                                                                      |
| Pp3c9_17830  | 3.39 | 8.75e-19  | actin-related protein 3                                                                |
| Pp3c21_9770  | 3.39 | 1.51e-75  | hypothetical protein PHYPA_007850                                                      |
| Pp3c4_17500  | 3.39 | 1.37e-181 | hypothetical protein PHYPA_021207                                                      |
| Pp3c20_1301  | 3.38 | 1.45e-03  | ---NA---                                                                               |
| Pp3c5_28420  | 3.38 | 1.52e-07  | polyadenylate-binding protein 2-like<br>isoform X1                                     |
| Pp3c5_22560  | 3.37 | 1.91e-45  | 2-isopropylmalate synthase                                                             |
| Pp3c3_28140  | 3.37 | 1.12e-45  | hypothetical protein PHYPA_022950                                                      |
| Pp3c1_9320   | 3.37 | 3.20e-92  | receptor kinase-like protein                                                           |
| Pp3c8_24170  | 3.37 | 1.48e-63  | Retrovirus-related Pol polyprotein from<br>transposon TNT 1-94                         |
| Pp3c1_10460  | 3.36 | 9.04e-34  | 60S ribosomal protein L22-3                                                            |
| Pp3c22_22960 | 3.35 | 8.67e-41  | putative RING-H2 finger protein ATL69                                                  |
| Pp3c6_12700  | 3.34 | 5.97e-13  | predicted protein                                                                      |

|              |      |           |                                             |
|--------------|------|-----------|---------------------------------------------|
| Pp3c4_23320  | 3.33 | 3.56e-29  | hypothetical protein PHYPA_021457           |
| Pp3c7_12470  | 3.33 | 1.86e-32  | hypothetical protein PHYPA_021773           |
| Pp3c4_24420  | 3.33 | 8.17e-22  | protein LURP-one-related 15-like            |
| Pp3c22_15880 | 3.33 | 6.15e-18  | protein translation factor SUI1 homolog     |
| Pp3c2_28140  | 3.33 | 4.59e-43  | uncharacterized protein LOC112289464        |
| Pp3c1_7740   | 3.32 | 3.12e-29  | hypothetical protein PHYPA_000398           |
| Pp3c19_6110  | 3.32 | 5.20e-16  | hypothetical protein PHYPA_024875           |
| Pp3c4_22080  | 3.32 | 9.28e-163 | putative helicase                           |
| Pp3c11_6920  | 3.31 | 1.07e-30  | hypothetical protein PHYPA_010450           |
|              |      |           | NADP-dependent glyceraldehyde-3-            |
| Pp3c21_10290 | 3.31 | 3.14e-39  | phosphate dehydrogenase-like                |
| Pp3c20_1460  | 3.31 | 8.33e-33  | transcriptional regulator, MarR family      |
| Pp3c22_5710  | 3.30 | 2.33e-11  | cold-shock DNA binding protein              |
| Pp3c18_19000 | 3.30 | 6.78e-30  | hypothetical protein PHYPA_005534           |
|              |      |           | bifunctional protein FOLD 4, chloroplastic- |
| Pp3c5_3280   | 3.29 | 2.42e-50  | like                                        |
| Pp3c14_7860  | 3.29 | 3.79e-22  | carbonic anhydrase 2-like isoform X1        |
| Pp3c24_14470 | 3.29 | 3.27e-17  | hypothetical protein PHYPA_018369           |
|              |      |           | NADH-ubiquinone oxidoreductase 20.9         |
| Pp3c2_9700   | 3.29 | 1.46e-38  | kDa subunit-like                            |
| Pp3c5_23450  | 3.28 | 1.51e-11  | hypothetical protein PHYPA_013536           |
| Pp3c11_13030 | 3.28 | 2.68e-18  | signal peptide peptidase-like 1             |
|              |      |           | DEXH-box ATP-dependent RNA helicase         |
| Pp3c18_6640  | 3.27 | 4.20e-20  | DEXH11                                      |
| Pp3c20_10830 | 3.25 | 1.03e-76  | hypothetical protein OsI_14862              |
| Pp3c20_12200 | 3.25 | 1.06e-14  | ---NA---                                    |
| Pp3c20_88    | 3.25 | 3.27e-04  | ---NA---                                    |
|              |      |           | protein SUPPRESSOR OF npr1-1,               |
| Pp3c5_13990  | 3.25 | 5.24e-11  | CONSTITUTIVE 1-like                         |
|              |      |           | xyloglucan galactosyltransferase            |
| Pp3c10_1100  | 3.25 | 5.41e-36  | KATAMARI1 homolog                           |
| Pp3c2_27350  | 3.24 | 2.10e-41  | citrate synthase, glyoxysomal               |
|              |      |           | EPIDERMAL PATTERNING FACTOR-like            |
| Pp3c6_2050   | 3.24 | 1.40e-57  | protein 6                                   |
| Pp3c15_17290 | 3.24 | 8.69e-05  | hypothetical protein PHYPA_003134, partial  |
| Pp3c4_15690  | 3.24 | 1.61e-39  | hypothetical protein PHYPA_020979           |
| Pp3c2_29750  | 3.23 | 5.14e-11  | acetate kinase                              |
|              |      |           | LRR receptor-like serine/threonine-protein  |
| Pp3c14_5500  | 3.22 | 6.38e-18  | kinase GSO1 isoform X1                      |
| Pp3c26_12740 | 3.22 | 6.76e-44  | ---NA---                                    |
| Pp3c26_4040  | 3.22 | 7.08e-63  | ---NA---                                    |
| Pp3c8_21080  | 3.21 | 1.19e-54  | hypothetical protein PHYPA_013091           |
| Pp3c1_26930  | 3.21 | 3.98e-18  | light-sensor Protein kinase-like            |
| Pp3c26_3430  | 3.21 | 4.85e-14  | pro-resilin-like isoform X2                 |
|              |      |           | uncharacterized protein LOC112273996        |
| Pp3c9_19340  | 3.21 | 3.84e-04  | isoform X1                                  |
| Pp3c8_16270  | 3.20 | 9.64e-39  | F-box protein SKIP31                        |
| Pp3c8_4960   | 3.20 | 3.68e-101 | uncharacterized protein LOC112286649        |



|              |      |           |                                                                                             |
|--------------|------|-----------|---------------------------------------------------------------------------------------------|
| Pp3c15_17690 | 3.19 | 3.61e-47  | Putative ribonuclease H protein<br>calcium-activated potassium channel                      |
| Pp3c2_27000  | 3.18 | 5.75e-27  | slowpoke-like isoform X1<br>eukaryotic translation initiation factor 3                      |
| Pp3c18_2960  | 3.18 | 2.01e-04  | subunit C-like                                                                              |
| Pp3c10_17670 | 3.18 | 1.85e-04  | hypothetical protein PHYPA_031247                                                           |
| Pp3c14_20030 | 3.18 | 1.15e-13  | peroxidase N1-like                                                                          |
| Pp3c18_22120 | 3.18 | 1.37e-44  | plasma membrane ATPase                                                                      |
| Pp3c12_14480 | 3.18 | 3.05e-120 | SH2 domain-containing protein A                                                             |
| Pp3c7_26250  | 3.17 | 2.15e-04  | 60S ribosomal protein L4-like                                                               |
| Pp3c26_2830  | 3.17 | 1.50e-15  | hypothetical protein PHYPA_000852, partial                                                  |
| Pp3c16_20970 | 3.17 | 1.68e-11  | putative alpha/Beta hydrolase fold protein<br>transcription initiation factor TFIID subunit |
| Pp3c17_7090  | 3.17 | 4.36e-57  | 14b                                                                                         |
| Pp3c7_20910  | 3.16 | 4.94e-32  | hemolysin A, putative                                                                       |
| Pp3c26_40    | 3.16 | 1.71e-04  | hypothetical protein PHYPA_000906                                                           |
| Pp3c10_16800 | 3.15 | 1.21e-22  | AP-1 complex subunit gamma-2 isoform X1<br>BTB/POZ domain-containing protein                |
| Pp3c22_20830 | 3.15 | 2.51e-13  | At1g63850-like                                                                              |
| Pp3c17_22500 | 3.15 | 2.50e-13  | histone H2A.6-like                                                                          |
| Pp3c3_22480  | 3.15 | 1.29e-79  | hypothetical protein PHYPA_029540                                                           |
| Pp3c27_8400  | 3.15 | 8.41e-15  | Molybdenum cofactor sulfurase 3<br>glycerophosphodiester phosphodiesterase                  |
| Pp3c14_22090 | 3.14 | 1.49e-24  | GDPD1, chloroplastic                                                                        |
| Pp3c16_7080  | 3.14 | 1.04e-13  | hypothetical protein PHYPA_023764                                                           |
| Pp3c7_15740  | 3.13 | 1.56e-04  | hypothetical protein PHYPA_028898                                                           |
| Pp3c14_3310  | 3.13 | 9.67e-23  | OBP32pep, putative (DUF220)<br>uncharacterized protein LOC112273006                         |
| Pp3c14_6110  | 3.13 | 3.17e-04  | isoform X1                                                                                  |
| Pp3c18_3130  | 3.12 | 1.64e-39  | transmembrane 9 superfamily member 7                                                        |
| Pp3c26_3070  | 3.11 | 5.71e-46  | hypothetical protein PHYPA_000864                                                           |
| Pp3c25_580   | 3.11 | 3.13e-17  | hypothetical protein PHYPA_011861                                                           |
| Pp3c16_19220 | 3.11 | 9.28e-24  | probable transcription factor PosF21                                                        |
| Pp3c3_740    | 3.11 | 1.50e-14  | RING-H2 finger protein ATL73-like                                                           |
| Pp3c22_8523  | 3.10 | 8.33e-15  | 40S ribosomal protein S13                                                                   |
| Pp3c8_10260  | 3.10 | 5.96e-91  | ABC transporter B family member 25<br>autophagy-related protein 18h-like isoform            |
| Pp3c7_3560   | 3.10 | 2.33e-11  | X1                                                                                          |
| Pp3c13_16620 | 3.10 | 1.80e-50  | hypothetical protein PHYPA_020128                                                           |
| Pp3c20_4190  | 3.09 | 3.25e-15  | phi class glutathione S-transferase                                                         |
| Pp3c18_20140 | 3.09 | 3.89e-34  | RING finger protein                                                                         |
| Pp3c6_3720   | 3.08 | 5.30e-87  | alcohol dehydrogenase class-3                                                               |
| Pp3c20_21833 | 3.08 | 3.40e-43  | hypothetical protein PHYPA_028133, partial                                                  |
| Pp3c24_30    | 3.08 | 2.29e-15  | MFT-like protein<br>pentatricopeptide repeat-containing protein                             |
| Pp3c4_26880  | 3.08 | 1.77e-29  | At2g35130                                                                                   |
| Pp3c20_21820 | 3.08 | 6.20e-43  | Zinc knuckle CX2CX4HX4C                                                                     |

|              |      |           |                                                                                                         |
|--------------|------|-----------|---------------------------------------------------------------------------------------------------------|
| Pp3c20_396   | 3.07 | 2.28e-04  | glyceraldehyde-3-phosphate<br>dehydrogenase, cytosolic-like<br>golgin subfamily A member 6-like protein |
| Pp3c7_19830  | 3.07 | 1.18e-37  | 22                                                                                                      |
| Pp3c7_19850  | 3.07 | 2.33e-37  | hypothetical protein PHYPA_029069                                                                       |
| Pp3c6_13990  | 3.07 | 3.41e-11  | receptor kinase-like protein                                                                            |
| Pp3c4_19490  | 3.06 | 2.64e-44  | 7-deoxyloganetin glucosyltransferase-like                                                               |
| Pp3c6_17010  | 3.06 | 2.78e-41  | GDSL esterase/lipase At4g10955 isoform X2                                                               |
| Pp3c3_27280  | 3.06 | 8.68e-15  | probable folate-biopterin transporter 2                                                                 |
| Pp3c3_12890  | 3.06 | 5.64e-40  | putative protease Do-like 14 isoform X1                                                                 |
| Pp3c26_2670  | 3.05 | 3.35e-10  | DUF724 domain-containing protein                                                                        |
| Pp3c7_12530  | 3.05 | 1.78e-12  | hypothetical protein PHYPA_021777<br>lysine-specific histone demethylase 1                              |
| Pp3c15_5890  | 3.05 | 1.20e-101 | homolog 3-like isoform X1                                                                               |
| Pp3c5_3730   | 3.05 | 3.50e-16  | uncharacterized protein LOC112274973                                                                    |
| Pp3c25_6760  | 3.04 | 2.20e-23  | LRR receptor kinase BAK1                                                                                |
| Pp3c26_2600  | 3.04 | 2.16e-12  | mannose/glucose-specific lectin-like                                                                    |
| Pp3c26_1520  | 3.04 | 2.09e-09  | myb-like protein Q                                                                                      |
| Pp3c22_20810 | 3.04 | 2.26e-14  | protein SPIRRIG-like                                                                                    |
| Pp3c26_1670  | 3.03 | 6.51e-10  | 40S ribosomal protein S10-1-like<br>pleckstrin homology domain-containing<br>protein 1-like             |
| Pp3c4_31020  | 3.03 | 1.11e-03  | uncharacterized protein LOC112290983                                                                    |
| Pp3c24_14400 | 3.03 | 9.92e-34  | carbonic anhydrase, chloroplastic-like                                                                  |
| Pp3c7_600    | 3.02 | 1.08e-12  | hypothetical protein PHYPA_015203                                                                       |
| Pp3c23_15050 | 3.01 | 5.93e-51  | hypothetical protein PHYPA_027345                                                                       |
| Pp3c5_9550   | 3.00 | 2.68e-65  | cytochrome c heme attachment protein<br>(chloroplast)                                                   |
| Pp3c15_2490  | 2.99 | 7.02e-52  | F-box protein At5g39450 isoform X2                                                                      |
| Pp3c6_270    | 2.99 | 5.15e-11  | phosphoadenosine phosphosulphate<br>reductase nuclear                                                   |
| Pp3c26_1680  | 2.99 | 1.76e-09  | probable chalcone--flavonone isomerase 3                                                                |
| Pp3c1_6050   | 2.99 | 1.53e-84  | hypothetical protein PHYPA_018180                                                                       |
| Pp3c25_12820 | 2.98 | 3.21e-09  | mediator of RNA polymerase II<br>transcription subunit 12                                               |
| Pp3c23_11581 | 2.98 | 4.19e-14  | uncharacterized protein LOC112276755                                                                    |
| Pp3c7_6500   | 2.98 | 3.71e-80  | isoform X1<br>multiple myeloma tumor-associated protein<br>2 homolog                                    |
| Pp3c1_33600  | 2.97 | 8.15e-15  | uncharacterized protein LOC112281426<br>isoform X1                                                      |
| Pp3c10_3170  | 2.97 | 2.97e-32  | eukaryotic translation initiation factor 4E-1                                                           |
| Pp3c15_3560  | 2.96 | 1.94e-90  | protein DMP4-like                                                                                       |
| Pp3c14_17840 | 2.96 | 7.05e-78  | putative abnormal suspensor 1                                                                           |
| Pp3c14_8460  | 2.96 | 3.38e-12  | putative UPF0481 protein At3g02645                                                                      |
| Pp3c3_32650  | 2.96 | 7.02e-67  | uncharacterized protein LOC112291007                                                                    |
| Pp3c24_4420  | 2.96 | 6.71e-29  | ras-related protein RABA5e                                                                              |
| Pp3c4_6640   | 2.95 | 7.56e-26  |                                                                                                         |

|              |      |          |                                                              |
|--------------|------|----------|--------------------------------------------------------------|
| Pp3c20_19230 | 2.95 | 4.48e-05 | two-component response regulator ARR15-like                  |
| Pp3c2_16250  | 2.94 | 3.45e-22 | 60S ribosomal protein L38                                    |
| Pp3c9_16970  | 2.94 | 7.59e-45 | ethylene-responsive transcription factor ERF039-like         |
| Pp3c3_26310  | 2.93 | 7.81e-13 | hypothetical protein PHYPA_029718                            |
| Pp3c10_20210 | 2.93 | 3.13e-83 | non-specific lipid transfer protein GPI-anchored 2           |
| Pp3c8_22460  | 2.93 | 2.51e-04 | p21-activated protein kinase-interacting protein 1-like      |
| Pp3c7_24490  | 2.93 | 5.62e-55 | purple acid phosphatase 23 isoform X1                        |
| Pp3c9_11330  | 2.93 | 2.15e-16 | two pore calcium channel protein 1-like isoform X1           |
| Pp3c23_5980  | 2.92 | 6.58e-10 | mitochondrial inner membrane protein OXA1-like               |
| Pp3c19_9280  | 2.92 | 8.97e-04 | probable copper-transporting ATPase HMA5                     |
| Pp3c5_4140   | 2.91 | 3.12e-84 | CASP-like protein 1C1                                        |
| Pp3c23_11590 | 2.91 | 2.96e-09 | flavin-containing monooxygenase FMO GS-OX-like 4             |
| Pp3c16_8340  | 2.91 | 4.91e-13 | transducin beta-like protein 2                               |
| Pp3c11_10560 | 2.91 | 1.39e-19 | trihelix transcription factor ASR3-like                      |
| Pp3c19_20160 | 2.91 | 4.80e-24 | zinc finger CCCH domain-containing protein 20                |
| Pp3c4_23600  | 2.90 | 1.06e-13 | hypothetical protein PHYPA_020385                            |
| Pp3c1_10630  | 2.90 | 5.00e-24 | uncharacterized protein LOC112288147 isoform X1              |
| Pp3c20_19460 | 2.89 | 9.99e-07 | coiled-coil domain-containing protein 94 homolog             |
| Pp3c19_21390 | 2.89 | 2.01e-14 | protein SUPPRESSOR OF npr1-1, CONSTITUTIVE 1-like isoform X1 |
| Pp3c7_10610  | 2.89 | 8.56e-33 | U-box domain-containing protein 13                           |
| Pp3c1_2740   | 2.88 | 1.19e-16 | hypothetical protein PHYPA_011990                            |
| Pp3c19_18410 | 2.88 | 1.29e-12 | ribosomal protein S2 (mitochondrion)                         |
| Pp3c15_8180  | 2.87 | 2.77e-38 | uncharacterized protein LOC112278689 isoform X1              |
| Pp3c18_18780 | 2.86 | 5.97e-17 | BTB/POZ domain-containing protein At1g67900-like             |
| Pp3c3_18290  | 2.86 | 1.71e-62 | glutamate--tRNA ligase, cytoplasmic                          |
| Pp3c16_5590  | 2.85 | 1.06e-48 | EEF1A lysine methyltransferase 2-like                        |
| Pp3c27_3810  | 2.85 | 1.42e-41 | protein LONGIFOLIA 1-like                                    |
| Pp3c24_12310 | 2.85 | 7.12e-15 | UDP-galactose/UDP-glucose transporter 3                      |
| Pp3s37_140   | 2.84 | 6.10e-16 | histidine kinase 4                                           |
| Pp3c11_10320 | 2.84 | 2.92e-18 | hypothetical protein PHYPA_006610                            |
| Pp3c2_33330  | 2.84 | 9.12e-09 | uracil-DNA glycosylase                                       |
| Pp3c9_14080  | 2.83 | 5.17e-26 | disease resistance protein TAO1-like                         |
| Pp3c17_14100 | 2.83 | 9.86e-52 | hypothetical protein PHYPA_004364                            |
| Pp3c8_8380   | 2.82 | 4.18e-51 | hypothetical protein PHYPA_012485                            |

|              |      |          |                                                                                                                 |
|--------------|------|----------|-----------------------------------------------------------------------------------------------------------------|
| Pp3c26_710   | 2.82 | 4.91e-09 | putative E3 ubiquitin ligase SUD1                                                                               |
| Pp3c16_2360  | 2.82 | 1.58e-33 | ribosomal-like protein, putative<br>trafficking protein particle complex subunit<br>4-like                      |
| Pp3c8_16240  | 2.82 | 9.19e-10 |                                                                                                                 |
| Pp3c15_20210 | 2.81 | 8.32e-13 | basic leucine zipper 61-like isoform X1                                                                         |
| Pp3c10_12290 | 2.81 | 2.31e-14 | endoglucanase 6-like                                                                                            |
| Pp3c21_16130 | 2.80 | 1.42e-06 | AAA-type ATPase-like                                                                                            |
| Pp3c16_10020 | 2.80 | 2.03e-06 | LOB domain-containing protein 10<br>transposon protein, putative, CACTA,<br>En/Spm sub-class                    |
| Pp3c23_22200 | 2.80 | 1.32e-13 |                                                                                                                 |
| Pp3c24_2390  | 2.79 | 2.32e-37 | 40S ribosomal protein S10-1-like                                                                                |
| Pp3c16_13150 | 2.79 | 1.96e-63 | cyclin-A1-4-like                                                                                                |
| Pp3c1_15390  | 2.79 | 4.55e-59 | RNA polymerase sigma factor sigA<br>3-oxoacyl-[acyl-carrier-protein] synthase I,<br>chloroplastic-like          |
| Pp3c2_27310  | 2.78 | 3.71e-96 |                                                                                                                 |
| Pp3c7_2800   | 2.78 | 4.89e-34 | protein WVD2-like 4                                                                                             |
| Pp3c9_3139   | 2.78 | 8.50e-13 | U-box domain-containing protein 44-like                                                                         |
| Pp3c24_2393  | 2.78 | 2.23e-36 | uncharacterized protein LOC112291717                                                                            |
| Pp3c1_25080  | 2.77 | 3.29e-38 | cell division control protein 45 homolog                                                                        |
| Pp3c18_22150 | 2.77 | 1.63e-24 | hypothetical protein PHYPA_004108                                                                               |
| Pp3c12_14478 | 2.77 | 5.53e-10 | hypothetical protein PHYPA_010791                                                                               |
| Pp3c23_1080  | 2.77 | 2.67e-18 | spastin isoform X1                                                                                              |
| Pp3c22_14940 | 2.76 | 4.27e-12 | hypothetical protein PHYPA_008068                                                                               |
| Pp3c1_12220  | 2.76 | 4.20e-15 | putative MADS-domain transcription factor                                                                       |
| Pp3c12_20160 | 2.76 | 2.19e-99 | uncharacterized protein LOC112285023<br>conserved oligomeric Golgi complex<br>subunit 4-like                    |
| Pp3c27_6880  | 2.75 | 1.93e-41 |                                                                                                                 |
| Pp3c18_17790 | 2.75 | 1.19e-59 | dolichol kinase EVAN-like                                                                                       |
| Pp3c21_14670 | 2.75 | 9.07e-14 | hypothetical protein PHYPA_030830                                                                               |
| Pp3c6_17860  | 2.75 | 1.88e-15 | non-specific lipid-transfer protein 4-like                                                                      |
| Pp3c4_8790   | 2.74 | 3.82e-03 | restin homolog isoform X2<br>translation initiation factor fusion with<br>methylthioribose kinase               |
| Pp3c2_37560  | 2.74 | 2.45e-09 |                                                                                                                 |
| Pp3c13_3830  | 2.73 | 1.86e-31 | 2,3-bisphosphoglycerate-dependent<br>phosphoglycerate mutase<br>DNA-directed RNA polymerase III subunit<br>RPC2 |
| Pp3c18_22140 | 2.73 | 2.39e-09 |                                                                                                                 |
| Pp3c13_17100 | 2.73 | 5.34e-55 | hypothetical protein PHYPA_020146                                                                               |
| Pp3c8_12680  | 2.73 | 1.99e-44 | WUSCHEL-related homeobox 8-like<br>S-adenosyl-L-methionine-dependent                                            |
| Pp3c1_41530  | 2.72 | 1.79e-20 | methyltransferases superfamily protein                                                                          |
| Pp3c1_36360  | 2.72 | 8.35e-43 | sucrose transport protein SUC3-like<br>3-deoxy-manno-octulosonate                                               |
| Pp3c23_20910 | 2.71 | 6.33e-81 | cytidyltransferase, mitochondrial-like<br>aminodeoxychorismate synthase,<br>chloroplastic isoform X1            |
| Pp3c10_12760 | 2.71 | 8.18e-31 |                                                                                                                 |
| Pp3c3_17950  | 2.71 | 7.05e-04 | hypothetical protein PHYPA_029854                                                                               |

|              |      |          |                                                    |
|--------------|------|----------|----------------------------------------------------|
| Pp3c6_10250  | 2.71 | 1.99e-11 | Localized to the inner membrane of the chloroplast |
| Pp3c11_14310 | 2.71 | 7.20e-16 | predicted protein                                  |
| Pp3c11_14770 | 2.70 | 2.82e-81 | glycosyltransferase family 92 protein              |
| Pp3c17_14090 | 2.70 | 3.18e-34 | RCOM_0530710-like                                  |
| Pp3c1_2700   | 2.70 | 9.41e-15 | hypothetical protein PHYPA_004362                  |
| Pp3c2_2790   | 2.70 | 6.10e-14 | light-sensor Protein kinase-like                   |
| Pp3c5_23340  | 2.70 | 1.21e-69 | mitotic-spindle organizing protein 1-like          |
| Pp3c7_25640  | 2.69 | 3.63e-54 | TLD domain-containing protein 1                    |
| Pp3c1_470    | 2.69 | 4.41e-07 | DUF21 domain-containing protein                    |
| Pp3c3_22320  | 2.69 | 2.26e-48 | At4g14240-like                                     |
| Pp3c5_3340   | 2.69 | 3.72e-76 | hypothetical protein PHYPA_000194                  |
| Pp3c2_1951   | 2.69 | 3.55e-22 | hypothetical protein PHYPA_029533                  |
| Pp3c15_6210  | 2.69 | 1.99e-20 | kinesin-like protein KIF16B isoform X1             |
| Pp3c1_33540  | 2.69 | 1.83e-14 | leucine-rich repeat extensin-like protein 5        |
| Pp3c4_17130  | 2.69 | 7.61e-11 | putative retrotransposon gag domain,               |
| Pp3c24_11130 | 2.69 | 2.92e-31 | Retroviral aspartyl protease                       |
| Pp3c7_26390  | 2.67 | 2.66e-34 | pyruvate decarboxylase 1                           |
| Pp3c1_39250  | 2.67 | 1.16e-53 | senescence-associated protein AAF,                 |
| Pp3c1_2960   | 2.67 | 1.84e-19 | chloroplast-like                                   |
| Pp3c15_12420 | 2.66 | 1.43e-11 | uncharacterized protein LOC112289464               |
| Pp3c1_35228  | 2.66 | 3.05e-19 | hypothetical protein PHYPA_028591                  |
| Pp3c3_1210   | 2.66 | 5.47e-63 | phosphate acetyltransferase                        |
| Pp3c5_13590  | 2.66 | 1.55e-29 | PREDICTED: uncharacterized protein                 |
| Pp3c7_13610  | 2.66 | 6.45e-30 | LOC107808225                                       |
| Pp3c21_16610 | 2.66 | 7.32e-18 | BRO1 domain containing protein                     |
| Pp3c10_8620  | 2.66 | 2.27e-12 | hypothetical protein PHYPA_001383, partial         |
| Pp3c24_14460 | 2.66 | 5.44e-27 | hypothetical protein PHYPA_008552                  |
| Pp3c13_23010 | 2.66 | 2.36e-10 | hypothetical protein PHYPA_014164                  |
| Pp3c1_35940  | 2.66 | 2.19e-99 | hypothetical protein PHYPA_021817                  |
| Pp3c6_26980  | 2.65 | 3.07e-09 | hypothetical protein PHYPA_030722                  |
| Pp3c10_7650  | 2.65 | 2.43e-13 | NADH:ubiquinone oxidoreductase                     |
| Pp3c16_23960 | 2.65 | 3.13e-09 | peptidyl-prolyl cis-trans isomerase CYP28,         |
| Pp3c6_15470  | 2.65 | 2.67e-10 | chloroplastic                                      |
| Pp3c10_8570  | 2.65 | 7.42e-64 | predicted protein                                  |
| Pp3c15_12250 | 2.65 | 8.04e-09 | thioredoxin-like protein Clot                      |
| Pp3c5_11050  | 2.64 | 2.50e-09 | aldehyde oxidase GLOX-like                         |
| Pp3c1_2770   | 2.64 | 1.33e-15 | cilia- and flagella-associated protein 44-like     |
|              |      |          | isoform X1                                         |
|              |      |          | E3 ubiquitin-protein ligase BRE1-like 1            |
|              |      |          | isoform X1                                         |
|              |      |          | hypothetical protein PHYPA_026733                  |
|              |      |          | malate dehydrogenase, mitochondrial                |
|              |      |          | pentatricopeptide repeat-containing protein        |
|              |      |          | At2g41720                                          |
|              |      |          | 26S proteasome non-ATPase regulatory               |
|              |      |          | subunit 14 homolog                                 |
|              |      |          | hypothetical protein PHYPA_011998                  |

|              |      |          |                                                                      |
|--------------|------|----------|----------------------------------------------------------------------|
| Pp3c19_9850  | 2.64 | 1.34e-28 | ---NA---                                                             |
| Pp3c17_13270 | 2.64 | 5.73e-47 | Nramp-domain-containing protein                                      |
| Pp3c21_5600  | 2.64 | 1.93e-16 | Retrovirus-related Pol polyprotein from transposon TNT 1-94          |
| Pp3s37_40    | 2.64 | 9.29e-09 | uncharacterized protein LOC112277321                                 |
| Pp3c12_19130 | 2.63 | 1.05e-13 | digalactosyldiacylglycerol synthase 2, chloroplastic-like            |
| Pp3c1_39210  | 2.63 | 1.23e-52 | NADP-specific glutamate dehydrogenase isoform X1                     |
| Pp3c14_3405  | 2.63 | 1.79e-25 | probable cinnamyl alcohol dehydrogenase 1                            |
| Pp3c1_2880   | 2.63 | 5.21e-09 | prohibitin-3, mitochondrial-like                                     |
| Pp3c18_22071 | 2.63 | 4.28e-08 | ubiquitin domain-containing protein 1-like isoform X2                |
| Pp3c10_1200  | 2.62 | 8.05e-20 | GDSL esterase/lipase At1g09390-like isoform X1                       |
| Pp3c1_31630  | 2.62 | 8.53e-22 | hypothetical protein PHYPA_000618                                    |
| Pp3c1_21920  | 2.62 | 2.64e-06 | hypothetical protein PHYPA_011635                                    |
| Pp3c13_21450 | 2.62 | 4.61e-44 | methyl-CpG-binding domain protein 4-like protein                     |
| Pp3c13_12610 | 2.61 | 5.89e-56 | histone acetyltransferase type B catalytic subunit isoform X2        |
| Pp3c8_14030  | 2.61 | 2.02e-39 | hypothetical protein PHYPA_012734                                    |
| Pp3c8_19850  | 2.61 | 3.12e-21 | phosphoglycerate mutase-like protein                                 |
| Pp3c18_10070 | 2.61 | 3.30e-14 | protein-L-isoaspartate O-methyltransferase 1-like                    |
| Pp3c14_12730 | 2.61 | 4.37e-08 | ribulose biphosphate carboxylase small chain clone 512-like          |
| Pp3c1_2920   | 2.60 | 3.87e-09 | hypothetical protein PHYPA_000054                                    |
| Pp3c5_4780   | 2.60 | 4.39e-07 | inactive protein kinase                                              |
| Pp3c9_1620   | 2.60 | 4.50e-45 | SELMODRAFT_444075-like                                               |
| Pp3c7_16840  | 2.60 | 3.42e-13 | outer envelope protein 64, mitochondrial ribosomal RNA small subunit |
| Pp3c25_950   | 2.59 | 9.95e-54 | methyltransferase NEP1                                               |
| Pp3c17_5790  | 2.58 | 5.33e-50 | serine/arginine repetitive matrix protein 2 isoform X1               |
| Pp3c14_3280  | 2.58 | 1.39e-06 | hypothetical protein PHYPA_004981                                    |
| Pp3c2_11350  | 2.58 | 2.49e-08 | putative LOV domain-containing protein                               |
| Pp3c20_16830 | 2.57 | 5.40e-18 | Retrovirus-related Pol polyprotein from transposon TNT 1-94          |
| Pp3c21_20300 | 2.57 | 2.33e-25 | EPIDERMAL PATTERNING FACTOR-like protein 4                           |
| Pp3c20_5860  | 2.57 | 2.68e-49 | glutamyl-tRNA(Gln) amidotransferase subunit A                        |
| Pp3c1_16910  | 2.57 | 1.12e-79 | hornerin-like isoform X2                                             |
| Pp3c20_10050 | 2.57 | 9.72e-44 | hypothetical protein PHYPA_018185                                    |
| Pp3c19_2720  | 2.57 | 6.00e-07 | ---NA---                                                             |
|              |      |          | probable ATP-dependent DNA helicase                                  |
|              |      |          | CHR12                                                                |

|              |      |          |                                            |
|--------------|------|----------|--------------------------------------------|
| Pp3c2_34820  | 2.57 | 5.17e-44 | probable polyamine transporter At3g19553   |
| Pp3c17_18550 | 2.57 | 1.97e-14 | ultraviolet-B receptor UVR8                |
| Pp3c2_19640  | 2.57 | 1.14e-15 | uncharacterized protein LOC112290067       |
| Pp3c16_22670 | 2.56 | 6.51e-24 | cold-responsive protein kinase 1-like      |
| Pp3c16_14730 | 2.56 | 1.18e-06 | peptide methionine sulfoxide reductase A5  |
| Pp3c4_31920  | 2.56 | 9.66e-12 | transketolase, chloroplastic               |
| Pp3c16_23100 | 2.55 | 6.15e-03 | calcium-dependent protein kinase           |
| Pp3c1_2650   | 2.55 | 2.10e-08 | desiccation-related protein At2g46140      |
| Pp3c14_21347 | 2.55 | 2.07e-07 | light-sensor Protein kinase-like           |
| Pp3c27_6210  | 2.55 | 1.84e-12 | probable mannitol dehydrogenase            |
| Pp3c1_35610  | 2.55 | 3.41e-29 | retrotransposon reverse transcriptase      |
|              |      |          | uncharacterized protein LOC112278766       |
| Pp3c15_4170  | 2.55 | 2.12e-12 | isoform X1                                 |
| Pp3c14_1980  | 2.54 | 1.95e-32 | histone H2B.8-like                         |
| Pp3c19_20620 | 2.54 | 3.48e-09 | hypothetical protein PHYPA_024465          |
| Pp3c18_15920 | 2.54 | 1.42e-35 | protein AUXIN SIGNALING F-BOX 3-like       |
| Pp3c21_11360 | 2.54 | 3.82e-53 | SPX domain-containing protein 1-like       |
| Pp3c8_19160  | 2.54 | 2.59e-44 | topless-related protein 1-like isoform X1  |
| Pp3c11_8850  | 2.54 | 2.33e-38 | transmembrane protein 45A-like             |
| Pp3c3_20980  | 2.53 | 4.18e-72 | cytochrome b-c1 complex subunit 7-2-like   |
| Pp3c10_11042 | 2.53 | 2.40e-10 | gibberellin 3-beta-dioxygenase 1-like      |
| Pp3c1_5000   | 2.53 | 1.18e-26 | hypothetical protein PHYPA_000030          |
| Pp3c9_19810  | 2.53 | 1.33e-26 | mono [ADP-ribose] polymerase PARP16        |
| Pp3s1097_10  | 2.53 | 3.84e-07 | predicted protein                          |
| Pp3c5_5250   | 2.52 | 7.89e-13 | probable elongation factor 1-gamma 2       |
|              |      |          | uncharacterized protein LOC112276660       |
| Pp3c7_15720  | 2.52 | 8.37e-30 | isoform X2                                 |
|              |      |          | DExH-box ATP-dependent RNA helicase        |
| Pp3c10_7990  | 2.51 | 1.70e-08 | DExH15 chloroplastic                       |
|              |      |          | homeobox-leucine zipper protein HOX20-     |
| Pp3c2_18850  | 2.51 | 1.46e-22 | like isoform X1                            |
| Pp3c16_14660 | 2.51 | 4.63e-06 | hypothetical protein PHYPA_023511          |
| Pp3c4_2660   | 2.51 | 1.22e-02 | kelch domain-containing protein 4          |
| Pp3c16_14590 | 2.51 | 3.95e-06 | ---NA---                                   |
|              |      |          | NADH dehydrogenase [ubiquinone] iron-      |
| Pp3c1_36490  | 2.51 | 2.33e-32 | sulfur protein 1, mitochondrial            |
|              |      |          | ribonucleoside-diphosphate reductase large |
| Pp3c6_14750  | 2.51 | 2.71e-21 | subunit-like                               |
|              |      |          | RING/FYVE/PHD zinc finger superfamily      |
| Pp3c5_15400  | 2.51 | 6.15e-35 | protein, putative isoform 2                |
| Pp3c10_3550  | 2.51 | 1.53e-09 | transcription factor ILR3-like             |
|              |      |          | uncharacterized protein LOC112292081       |
| Pp3c1_36300  | 2.51 | 1.32e-35 | isoform X2                                 |
| Pp3c2_6500   | 2.50 | 1.07e-15 | hypothetical protein PHYPA_009447          |
| Pp3c16_14640 | 2.50 | 5.93e-06 | hypothetical protein PHYPA_019603          |
| Pp3c20_5150  | 2.49 | 4.04e-42 | hypothetical protein PHYPA_027552          |

|              |      |          |                                                                                                      |
|--------------|------|----------|------------------------------------------------------------------------------------------------------|
|              |      |          | receptor homology region, transmembrane domain- and RING domain-containing protein 1-like isoform X1 |
| Pp3c5_24760  | 2.49 | 4.09e-66 | subtilisin-like protease SBT6.1                                                                      |
| Pp3c17_9830  | 2.49 | 4.36e-05 | coiled-coil domain-containing protein 18-like                                                        |
| Pp3c4_20080  | 2.48 | 3.21e-12 | DNA replication licensing factor MCM6                                                                |
| Pp3c20_7230  | 2.48 | 3.02e-09 | hypothetical protein PHYP_A_001202                                                                   |
| Pp3c26_8990  | 2.48 | 6.75e-20 | root phototropism protein 3-like                                                                     |
| Pp3c21_18700 | 2.48 | 1.47e-35 | 2-Cys peroxiredoxin BAS1, chloroplastic-like                                                         |
| Pp3c14_8980  | 2.47 | 1.24e-11 | histone-lysine N-methyltransferase 2D-like isoform X1                                                |
| Pp3c1_17450  | 2.47 | 3.73e-06 | probable pre-mRNA-splicing factor ATP-dependent RNA helicase DEAH2 isoform X1                        |
| Pp3c20_18130 | 2.47 | 2.11e-50 | 30S ribosomal protein S A                                                                            |
| Pp3c24_4040  | 2.46 | 1.28e-08 | actin cytoskeleton-regulatory complex protein pan-1                                                  |
| Pp3c13_8100  | 2.45 | 2.74e-21 | predicted protein                                                                                    |
| Pp3c1_2520   | 2.45 | 8.97e-13 | protein COFACTOR ASSEMBLY OF COMPLEX C SUBUNIT B CCB2, chloroplastic-like                            |
| Pp3c14_12090 | 2.45 | 3.13e-09 | Histone-lysine N-methyltransferase ATXR2                                                             |
| Pp3c23_15420 | 2.44 | 1.51e-03 | hypothetical protein OsI_24495                                                                       |
| Pp3c20_14530 | 2.44 | 2.19e-06 | ---NA---                                                                                             |
| Pp3c1_14250  | 2.44 | 3.42e-10 | pfkB family carbohydrate kinase                                                                      |
| Pp3c13_23030 | 2.44 | 1.35e-08 | probable cinnamyl alcohol dehydrogenase 6                                                            |
| Pp3c20_15000 | 2.44 | 2.08e-09 | protein saal1-like isoform X4                                                                        |
| Pp3c11_12290 | 2.44 | 1.17e-47 | uncharacterized protein LOC112277036                                                                 |
| Pp3c7_22860  | 2.44 | 3.99e-11 | chalcone synthase-like                                                                               |
| Pp3c16_17510 | 2.43 | 1.23e-26 | hypothetical protein PHYP_A_002915                                                                   |
| Pp3c15_11920 | 2.43 | 5.24e-17 | nuclear transcription factor Y subunit B-3-like                                                      |
| Pp3c13_22390 | 2.43 | 8.99e-34 | mitogen-activated protein kinase kinase kinase 1-like                                                |
| Pp3c12_20050 | 2.42 | 3.26e-22 | ---NA---                                                                                             |
| Pp3c11_17210 | 2.42 | 1.87e-13 | transmembrane protein 128                                                                            |
| Pp3c3_18870  | 2.42 | 7.30e-07 | heavy metal-associated isoprenylated plant protein 30-like                                           |
| Pp3c18_21810 | 2.41 | 6.22e-32 | hexokinase-1-like                                                                                    |
| Pp3c25_11400 | 2.41 | 1.05e-21 | hypothetical protein VOLCADRAFT_95342                                                                |
| Pp3c19_8700  | 2.41 | 1.39e-37 | pentatricopeptide repeat-containing-like protein                                                     |
| Pp3c21_13220 | 2.41 | 1.39e-12 | putative Na P-type ATPase                                                                            |
| Pp3c8_20410  | 2.41 | 4.65e-07 | tetratricopeptide repeat protein 28-like                                                             |
| Pp3c1_42570  | 2.41 | 4.49e-11 | hydroxyproline O-arabinoxyltransferase 3-like                                                        |
| Pp3c24_20470 | 2.40 | 1.67e-08 |                                                                                                      |



|              |      |           |                                                                                     |
|--------------|------|-----------|-------------------------------------------------------------------------------------|
| Pp3c5_3040   | 2.40 | 3.18e-31  | hypothetical protein PHYPA_027068, partial nucleolar and coiled-body phosphoprotein |
| Pp3c6_3530   | 2.40 | 8.96e-38  | 1-like                                                                              |
| Pp3c3_31700  | 2.40 | 3.76e-26  | protein MIZU-KUSSEI 1                                                               |
| Pp3c17_16260 | 2.40 | 3.04e-111 | uncharacterized protein LOC112279939                                                |
| Pp3c10_8200  | 2.39 | 8.51e-28  | ADP-ribosylation factor 1-like                                                      |
| Pp3c23_12620 | 2.39 | 9.27e-33  | apolipoprotein D-like                                                               |
| Pp3c26_12710 | 2.39 | 6.02e-13  | calcium-transporting ATPase 8, plasma membrane-type-like                            |
| Pp3c14_24300 | 2.39 | 2.10e-18  | E3 ubiquitin-protein ligase SPL2                                                    |
| Pp3c12_25770 | 2.39 | 2.99e-05  | E3 ubiquitin-protein ligase UPL1-like isoform X1                                    |
| Pp3c12_24670 | 2.39 | 2.42e-52  | hypothetical protein PHYPA_010066                                                   |
| Pp3c1_2830   | 2.39 | 2.89e-20  | proteasome subunit alpha type-6                                                     |
| Pp3c20_2485  | 2.39 | 4.65e-08  | protein piccolo-like                                                                |
| Pp3c20_200   | 2.38 | 1.15e-27  | callose synthase 12-like                                                            |
| Pp3c26_2640  | 2.38 | 3.17e-08  | hypothetical protein PHYPA_000845                                                   |
| Pp3c27_8130  | 2.37 | 1.90e-67  | cellulose synthase-like protein D3                                                  |
| Pp3c12_21260 | 2.37 | 1.23e-12  | hypothetical protein PHYPA_009922                                                   |
| Pp3c14_17020 | 2.37 | 6.44e-90  | hypothetical protein PHYPA_016864                                                   |
| Pp3c10_13010 | 2.36 | 3.09e-08  | aldehyde oxidase GLOX-like                                                          |
| Pp3c20_3900  | 2.36 | 5.81e-07  | BTB/POZ domain-containing protein At3g05675-like                                    |
| Pp3c16_9250  | 2.36 | 3.29e-24  | putative phospholipid-transporting ATPase 9 isoform X1                              |
| Pp3c6_28370  | 2.36 | 2.62e-19  | tetratricopeptide repeat protein 38                                                 |
| Pp3c20_6780  | 2.36 | 1.98e-22  | uncharacterized PKHD-type hydroxylase At1g22950-like                                |
| Pp3c11_24860 | 2.36 | 1.83e-09  | uncharacterized protein LOC112280777 isoform X1                                     |
| Pp3c17_15650 | 2.35 | 9.92e-80  | 40S ribosomal protein S17-like                                                      |
| Pp3c14_12710 | 2.35 | 1.03e-04  | FACT complex subunit SPT16-like                                                     |
| Pp3c13_22780 | 2.35 | 2.11e-16  | hypothetical protein PHYPA_019357                                                   |
| Pp3c18_16800 | 2.35 | 1.19e-14  | nuclear pore complex protein NUP155                                                 |
| Pp3c2_6160   | 2.35 | 2.59e-17  | phosphomevalonate kinase, peroxisomal-like                                          |
| Pp3c8_14810  | 2.35 | 1.12e-18  | polyphenol oxidase, chloroplastic-like                                              |
| Pp3c17_6080  | 2.34 | 9.89e-23  | chloroplast outer envelope 24 kD protein (omp24)                                    |
| Pp3c4_11080  | 2.34 | 3.15e-24  | hypothetical protein PHYPA_022924                                                   |
| Pp3c26_2630  | 2.34 | 9.92e-08  | importin subunit alpha-1-like isoform X1                                            |
| Pp3c4_29300  | 2.34 | 2.31e-30  | ---NA---                                                                            |
| Pp3c21_10100 | 2.34 | 1.64e-05  | Retrovirus-related Pol polyprotein from transposon TNT 1-94                         |
| Pp3c10_25590 | 2.34 | 3.59e-23  | soul heme-binding family protein                                                    |
| Pp3c8_19590  | 2.33 | 2.10e-11  | 50S ribosomal protein L11, chloroplastic-like                                       |
| Pp3c18_8540  | 2.33 | 1.52e-06  | hypothetical protein PHYPA_025077                                                   |

|              |      |          |                                                                            |
|--------------|------|----------|----------------------------------------------------------------------------|
| Pp3c3_25940  | 2.33 | 5.52e-22 | hypothetical protein PHYPA_029700<br>mitochondrial import inner membrane   |
| Pp3c20_17310 | 2.33 | 9.99e-21 | translocase subunit TIM22-2-like                                           |
| Pp3c27_6610  | 2.33 | 4.05e-06 | predicted protein                                                          |
| Pp3c22_20140 | 2.33 | 3.36e-07 | Zinc finger, PHD-type                                                      |
| Pp3c26_14690 | 2.32 | 6.11e-23 | 40S ribosomal protein S27-2                                                |
| Pp3c20_15090 | 2.32 | 2.03e-17 | ---NA---                                                                   |
| Pp3c5_11730  | 2.32 | 8.28e-21 | Phox homologous domain                                                     |
| Pp3c17_18740 | 2.32 | 3.37e-14 | predicted protein<br>axoneme-associated protein MST101(2)<br>protein       |
| Pp3c20_9341  | 2.31 | 2.97e-16 | clathrin heavy chain 1                                                     |
| Pp3c1_40420  | 2.31 | 5.17e-05 | hypothetical protein PHYPA_001981                                          |
| Pp3c14_5450  | 2.31 | 3.13e-12 | hypothetical protein PHYPA_003657                                          |
| Pp3c15_5630  | 2.31 | 2.11e-30 | multifunctional methyltransferase subunit<br>TRM112-like protein At1g22270 |
| Pp3c5_24940  | 2.31 | 1.69e-44 | transcription factor FAMA-like isoform X1                                  |
| Pp3c3_23910  | 2.31 | 6.23e-42 | DNA-3-methyladenine glycosylase                                            |
| Pp3c1_42450  | 2.30 | 2.90e-28 | metalloendoproteinase 1-MMP-like                                           |
| Pp3c3_13510  | 2.30 | 7.13e-30 | probable RNA helicase SDE3                                                 |
| Pp3c2_28330  | 2.30 | 3.88e-06 | protein fluG-like                                                          |
| Pp3c9_570    | 2.30 | 2.60e-25 | Retrovirus-related Pol polyprotein from<br>transposon TNT 1-94             |
| Pp3c21_15300 | 2.30 | 4.12e-20 | zinc finger protein 706-like                                               |
| Pp3c11_7750  | 2.30 | 1.73e-05 | cyclin-dependent protein kinase inhibitor<br>SMR9-like                     |
| Pp3c7_25050  | 2.29 | 5.51e-05 | DTW domain-containing protein 2-like                                       |
| Pp3c20_20430 | 2.29 | 3.16e-28 | hypothetical protein PHYPA_000533                                          |
| Pp3c1_2980   | 2.29 | 2.46e-12 | hypothetical protein PHYPA_005070                                          |
| Pp3c17_7780  | 2.29 | 1.22e-04 | hypothetical protein PHYPA_012812                                          |
| Pp3c8_15710  | 2.29 | 1.99e-10 | hypothetical protein PHYPA_013348                                          |
| Pp3c5_19530  | 2.29 | 1.03e-39 | callose synthase 9-like isoform X1                                         |
| Pp3c5_14090  | 2.28 | 4.20e-08 | centrosome-associated protein CEP250-like<br>isoform X1                    |
| Pp3c6_28490  | 2.28 | 2.19e-22 | coronatine-insensitive protein 1                                           |
| Pp3c7_12700  | 2.28 | 1.28e-39 | hypothetical protein PHYPA_013565                                          |
| Pp3c5_24100  | 2.28 | 1.05e-25 | phosphatidylinositol 4-kinase gamma 3                                      |
| Pp3c8_1520   | 2.28 | 9.42e-05 | stromal cell-derived factor 2-like protein                                 |
| Pp3c2_18570  | 2.28 | 2.23e-09 | TMV resistance protein N-like                                              |
| Pp3c8_22560  | 2.28 | 2.80e-17 | carotenoid 9,10(9',10')-cleavage dioxygenase<br>1-like                     |
| Pp3c2_1940   | 2.27 | 9.55e-13 | hypothetical protein PHYPA_019288                                          |
| Pp3c13_21340 | 2.27 | 2.53e-02 | hypothetical protein PHYPA_024661                                          |
| Pp3c19_22400 | 2.27 | 8.85e-11 | long chain acyl-CoA synthetase 6,<br>peroxisomal-like isoform X5           |
| Pp3c3_37730  | 2.27 | 2.26e-10 | probable plastidic glucose transporter 2<br>isoform X1                     |
| Pp3c22_20240 | 2.27 | 4.00e-07 | transcription factor bHLH84                                                |
| Pp3c3_15040  | 2.27 | 4.96e-08 |                                                                            |

|              |      |          |                                             |
|--------------|------|----------|---------------------------------------------|
| Pp3c15_12390 | 2.26 | 2.24e-07 | hypothetical protein PHYPA_002066           |
| Pp3c7_18490  | 2.26 | 1.28e-05 | hypothetical protein PHYPA_029016           |
| Pp3c10_10710 | 2.26 | 7.80e-18 | hypothetical protein PHYPA_030630           |
| Pp3c23_7740  | 2.26 | 6.52e-43 | mitochondrial uncoupling protein 5-like     |
| Pp3c25_1860  | 2.26 | 1.25e-08 | MLP-like protein 423                        |
| Pp3c19_5710  | 2.26 | 1.10e-13 | ---NA---                                    |
| Pp3c15_7040  | 2.26 | 1.15e-16 | uncharacterized protein LOC112295054        |
| Pp3c7_20870  | 2.25 | 8.52e-16 | 50S ribosomal protein L25-like              |
| Pp3c5_24720  | 2.25 | 1.81e-16 | 60S ribosomal protein L31                   |
| Pp3c26_12810 | 2.25 | 2.37e-26 | cytochrome P450 71A1-like                   |
| Pp3c15_20060 | 2.25 | 5.96e-08 | dof zinc finger protein DOF4.3-like         |
| Pp3c14_6070  | 2.25 | 1.20e-81 | hypothetical protein PHYPA_002628           |
| Pp3c7_7810   | 2.25 | 7.49e-17 | ---NA---                                    |
| Pp3c21_3760  | 2.25 | 2.43e-40 | probable pectinesterase 53                  |
| Pp3c26_8420  | 2.25 | 1.13e-07 | Testis-expressed sequence 2 protein         |
| Pp3c20_6660  | 2.24 | 1.11e-08 | hypothetical protein PHYPA_027570           |
| Pp3c10_17080 | 2.24 | 5.04e-14 | hypothetical protein PHYPA_030053           |
|              |      |          | squamosa promoter-binding-like protein 7    |
| Pp3c18_11190 | 2.24 | 1.81e-16 | isoform X1                                  |
|              |      |          | biogenesis of lysosome-related organelles   |
| Pp3c9_24030  | 2.23 | 3.49e-05 | complex 1 subunit 2                         |
|              |      |          | ethylene-responsive transcription factor 3- |
| Pp3c21_1310  | 2.23 | 1.84e-08 | like                                        |
| Pp3c23_5960  | 2.23 | 9.09e-15 | protein HASTY 1                             |
| Pp3c1_28510  | 2.23 | 6.99e-08 | sugar transporter ERD6-like 4               |
|              |      |          | dihydrolipoyllysine-residue                 |
|              |      |          | succinyltransferase component of 2-         |
|              |      |          | oxoglutarate dehydrogenase complex 2,       |
| Pp3c12_12080 | 2.22 | 6.63e-25 | mitochondrial-like isoform X4               |
| Pp3c18_1710  | 2.22 | 1.83e-16 | hypothetical protein PHYPA_005465           |
| Pp3c11_22850 | 2.22 | 4.12e-14 | hypothetical protein PHYPA_005861           |
| Pp3c10_6710  | 2.22 | 4.59e-23 | hypothetical protein PHYPA_006436           |
| Pp3c21_19440 | 2.22 | 1.81e-04 | ---NA---                                    |
|              |      |          | protein SUPPRESSOR OF npr1-1,               |
| Pp3c20_3140  | 2.22 | 5.63e-06 | CONSTITUTIVE 1-like                         |
| Pp3c17_13150 | 2.22 | 2.87e-06 | uncharacterized protein LOC112279533        |
| Pp3c4_10820  | 2.22 | 1.64e-05 | uncharacterized protein LOC112295118        |
| Pp3c17_21590 | 2.21 | 1.03e-10 | 60S ribosomal protein L23A                  |
|              |      |          | ACT domain-containing protein ACR9-like     |
| Pp3c26_8290  | 2.21 | 1.10e-14 | isoform X2                                  |
| Pp3c7_23740  | 2.21 | 6.06e-26 | bifunctional nuclease 1-like                |
| Pp3c25_5790  | 2.21 | 2.96e-06 | E3 UFM1-protein ligase 1 homolog            |
| Pp3c11_2870  | 2.21 | 3.18e-11 | glycosyltransferase family 64 protein C4    |
| Pp3c22_15560 | 2.21 | 1.64e-14 | hypothetical protein PHYPA_008089           |
| Pp3c12_4260  | 2.21 | 1.00e-41 | hypothetical protein PHYPA_019570           |
|              |      |          | non-specific lipid-transfer protein-like    |
| Pp3c22_8970  | 2.21 | 2.99e-06 | protein At2g13820                           |

|              |      |          |                                                                                      |
|--------------|------|----------|--------------------------------------------------------------------------------------|
| Pp3c2_30580  | 2.20 | 2.74e-38 | 50S ribosomal protein L28, chloroplastic-like                                        |
| Pp3c12_5140  | 2.20 | 1.43e-07 | ARF guanine-nucleotide exchange factor GNOM                                          |
| Pp3c14_20010 | 2.20 | 1.22e-11 | hypothetical protein PHYPA_017769                                                    |
| Pp3c7_430    | 2.20 | 6.12e-07 | nuclear pore complex protein NUP58                                                   |
| Pp3c10_8000  | 2.20 | 1.00e-25 | protein-L-isoaspartate O-methyltransferase 1-like                                    |
| Pp3c15_22980 | 2.20 | 6.10e-17 | uncharacterized protein LOC112295735                                                 |
| Pp3c5_18730  | 2.19 | 4.20e-27 | GDSL esterase/lipase At3g26430                                                       |
| Pp3c19_14040 | 2.19 | 4.06e-37 | hypothetical protein PHYPA_025278                                                    |
| Pp3c9_2080   | 2.19 | 4.01e-08 | peptide methionine sulfoxide reductase A5-like isoform X1                            |
| Pp3c16_16710 | 2.19 | 1.69e-87 | probable xyloglucan 6-xylosyltransferase 5                                           |
| Pp3c4_20210  | 2.19 | 6.26e-70 | protein SUPPRESSOR OF npr1-1, CONSTITUTIVE 1-like isoform X1                         |
| Pp3c16_25090 | 2.19 | 4.08e-05 | ribosomal protein S19 (chloroplast)                                                  |
| Pp3c15_18090 | 2.18 | 5.31e-28 | hypothetical protein PHYPA_003162                                                    |
| Pp3c13_2080  | 2.18 | 4.23e-06 | hypothetical protein PHYPA_019263                                                    |
| Pp3c9_21410  | 2.18 | 3.35e-15 | hypothetical protein PHYPA_026491                                                    |
| Pp3c14_24040 | 2.18 | 5.44e-07 | oxygen-evolving enhancer protein 3-1, chloroplastic-like                             |
| Pp3c19_2670  | 2.18 | 2.96e-05 | phenylalanine ammonia-lyase-like                                                     |
| Pp3c1_12230  | 2.18 | 8.04e-09 | putative MADS-domain transcription factor 5-amino-6-(5-phospho-D-ribitylamino)uracil |
| Pp3c11_5710  | 2.17 | 2.51e-56 | phosphatase, chloroplastic-like                                                      |
| Pp3c1_9560   | 2.17 | 3.17e-19 | hypothetical protein PHYPA_016097                                                    |
| Pp3c23_11240 | 2.17 | 2.78e-17 | probable histone-arginine methyltransferase CARM1                                    |
| Pp3c18_17810 | 2.17 | 2.89e-16 | pumilio homolog 1-like                                                               |
| Pp3c9_4620   | 2.17 | 6.04e-07 | uncharacterized protein LOC112274085                                                 |
| Pp3c9_16610  | 2.16 | 1.70e-12 | 60S acidic ribosomal protein P3-2                                                    |
| Pp3c21_6390  | 2.16 | 3.52e-19 | casein kinase II subunit beta-3-like isoform X1                                      |
| Pp3c18_15890 | 2.16 | 5.25e-33 | hypothetical protein PHYPA_005419                                                    |
| Pp3c22_8950  | 2.16 | 8.15e-50 | hypothetical protein PHYPA_014904                                                    |
| Pp3c13_8200  | 2.16 | 2.51e-11 | hypothetical protein PHYPA_017245                                                    |
| Pp3c16_3330  | 2.16 | 3.92e-08 | methyltransferase-like protein 13                                                    |
| Pp3c25_10450 | 2.16 | 1.19e-67 | MLO-like protein 5                                                                   |
| Pp3c23_5270  | 2.16 | 2.35e-05 | ---NA---                                                                             |
| Pp3c20_14770 | 2.15 | 3.45e-14 | cationic amino acid transporter 6, chloroplastic-like                                |
| Pp3c11_3960  | 2.15 | 6.78e-29 | chaperone protein dnaJ 15-like isoform X1                                            |
| Pp3c4_24710  | 2.15 | 8.68e-07 | glucose-6-phosphate isomerase 1, chloroplastic                                       |
| Pp3c27_4280  | 2.15 | 4.13e-22 | hypothetical protein PHYPA_001484                                                    |
| Pp3c2_21330  | 2.15 | 2.06e-42 | probable splicing factor, arginine/serine-rich                                       |

|              |      |          |                                              |
|--------------|------|----------|----------------------------------------------|
| Pp3c8_12410  | 2.15 | 2.31e-72 | R3H domain-containing protein 2-like         |
| Pp3c10_3790  | 2.14 | 6.01e-26 | Alpha-protein kinase vwvA                    |
| Pp3c26_11700 | 2.14 | 4.70e-20 | hypothetical protein PHYPA_011309            |
| Pp3c1_24700  | 2.14 | 4.14e-03 | hypothetical protein PHYPA_011871, partial   |
| Pp3c5_24680  | 2.14 | 2.72e-12 | hypothetical protein PHYPA_013590            |
| Pp3c3_20420  | 2.14 | 1.63e-40 | hypothetical protein PHYPA_029965            |
|              |      |          | LRR receptor-like serine/threonine-protein   |
| Pp3c9_5080   | 2.14 | 1.46e-03 | kinase ERL1                                  |
| Pp3c4_29120  | 2.14 | 3.03e-18 | transcription factor bHLH49-like             |
|              |      |          | translation initiation factor eIF-2B subunit |
| Pp3c9_13730  | 2.14 | 9.65e-16 | beta-like                                    |
|              |      |          | uncharacterized protein LOC112285205         |
| Pp3c11_760   | 2.14 | 1.10e-20 | isoform X1                                   |
| Pp3c2_25070  | 2.14 | 2.41e-04 | zinc finger protein squeeze isoform X2       |
|              |      |          | galactan beta-1,4-galactosyltransferase      |
| Pp3c9_19210  | 2.13 | 6.00e-25 | GALS3-like                                   |
| Pp3c18_18540 | 2.13 | 4.52e-26 | hypothetical protein PHYPA_005513            |
| Pp3c22_21290 | 2.13 | 4.02e-07 | hypothetical protein PHYPA_008299            |
| Pp3c10_8020  | 2.13 | 7.26e-41 | NAC domain-containing protein 76-like        |
| Pp3c21_14500 | 2.13 | 7.90e-46 | tobamovirus multiplication protein 2A-like   |
| Pp3c21_440   | 2.12 | 2.95e-06 | F-box/kelch-repeat protein At5g15710-like    |
| Pp3c4_22330  | 2.12 | 3.33e-24 | hypothetical protein PHYPA_021421            |
| Pp3c1_24600  | 2.12 | 1.29e-02 | NADPH--cytochrome P450 reductase-like        |
|              |      |          | palmitoyl-acyl carrier protein thioesterase, |
| Pp3c16_24050 | 2.12 | 1.96e-07 | chloroplastic-like                           |
| Pp3c8_15360  | 2.12 | 3.48e-15 | predicted protein                            |
|              |      |          | short-chain dehydrogenase TIC 32,            |
| Pp3c7_13080  | 2.12 | 1.97e-47 | chloroplastic                                |
| Pp3c2_32020  | 2.12 | 3.36e-12 | testis-expressed sequence 2 protein          |
| Pp3c6_6545   | 2.11 | 5.57e-34 | cellulose synthase-like protein D3           |
| Pp3c6_7260   | 2.11 | 1.32e-45 | disease resistance protein TAO1-like         |
| Pp3c10_21660 | 2.11 | 1.72e-05 | hypothetical protein PHYPA_006069            |
| Pp3c22_9051  | 2.11 | 1.58e-37 | kinetochore protein NDC80 homolog            |
| Pp3c22_9050  | 2.11 | 2.02e-37 | transportin MOS14 isoform X1                 |
| Pp3c1_14870  | 2.10 | 3.84e-18 | DNA polymerase                               |
| Pp3c16_13060 | 2.10 | 1.16e-12 | hypothetical protein PHYPA_002390            |
| Pp3c25_12800 | 2.10 | 5.39e-14 | hypothetical protein PHYPA_018179            |
|              |      |          | RNA polymerase-associated protein LEO1-      |
| Pp3c16_2040  | 2.10 | 4.78e-11 | like                                         |
| Pp3c2_6210   | 2.10 | 9.90e-13 | syntaxin-81                                  |
| Pp3c13_5660  | 2.09 | 9.25e-24 | ATP-cone                                     |
|              |      |          | protein phosphatase 1 regulatory subunit     |
| Pp3c16_13490 | 2.09 | 3.44e-30 | pprA                                         |
|              |      |          | Trafficking protein particle complex subunit |
| Pp3c6_13600  | 2.09 | 4.43e-07 | 5                                            |
|              |      |          | tRNA dimethylallyltransferase 9-like         |
| Pp3c4_27280  | 2.09 | 8.22e-26 | isoform X1                                   |

|              |      |          |                                             |
|--------------|------|----------|---------------------------------------------|
|              |      |          | uncharacterized membrane protein            |
| Pp3c23_16520 | 2.09 | 1.70e-04 | At1g06890                                   |
| Pp3c18_20200 | 2.08 | 2.37e-26 | ADP-ribosylation factor-like protein 5      |
| Pp3c16_13280 | 2.08 | 2.28e-04 | hypothetical protein PHYPA_002405           |
| Pp3c21_9570  | 2.08 | 5.15e-17 | hypothetical protein PHYPA_007837           |
| Pp3c10_8950  | 2.08 | 1.35e-05 | WAT1-related protein At4g19185-like         |
|              |      |          | ABC transporter B family member 25,         |
| Pp3c1_36390  | 2.07 | 2.78e-18 | mitochondrial-like                          |
|              |      |          | DNA polymerase delta catalytic subunit-     |
| Pp3c23_1100  | 2.07 | 2.85e-12 | like                                        |
| Pp3c18_4930  | 2.07 | 1.26e-13 | hypothetical protein AXX17_ATUG04580        |
| Pp3c26_8080  | 2.07 | 3.10e-34 | hypothetical protein PHYPA_000101           |
|              |      |          | pentatricopeptide repeat-containing protein |
| Pp3c6_13660  | 2.07 | 6.78e-08 | At5g02860                                   |
| Pp3c22_16800 | 2.07 | 9.36e-05 | UDP-glucose 4-epimerase GEPI48-like         |
| Pp3c19_10140 | 2.07 | 2.81e-27 | uncharacterized protein LOC112272993        |
| Pp3c15_5060  | 2.06 | 1.79e-09 | Aquaporin NIP6-1                            |
|              |      |          | coiled-coil domain-containing protein       |
| Pp3c17_10600 | 2.06 | 7.28e-06 | SCD2-like                                   |
|              |      |          | exocyst complex component SEC8-like         |
| Pp3c4_22010  | 2.06 | 1.76e-04 | isoform X1                                  |
| Pp3c2_32690  | 2.06 | 2.90e-46 | hypothetical protein PHYPA_008371, partial  |
| Pp3c14_20340 | 2.06 | 2.35e-12 | hypothetical protein PHYPA_017784           |
| Pp3c3_6480   | 2.06 | 6.70e-42 | hypothetical protein PHYPA_022745           |
| Pp3c22_10280 | 2.06 | 1.99e-07 | putative ABC1 family protein                |
| Pp3c24_14851 | 2.06 | 5.80e-04 | putative chaperone protein HSP31            |
|              |      |          | Retrovirus-related Pol polyprotein from     |
| Pp3c11_1560  | 2.06 | 3.88e-23 | transposon TNT 1-94                         |
|              |      |          | Retrovirus-related Pol polyprotein from     |
| Pp3c3_6890   | 2.06 | 2.17e-05 | transposon TNT 1-94                         |
|              |      |          | Retrovirus-related Pol polyprotein from     |
| Pp3c4_11030  | 2.06 | 1.20e-30 | transposon TNT 1-94                         |
| Pp3c23_19470 | 2.06 | 8.35e-31 | root phototropism protein 3-like isoform X1 |
| Pp3c13_4250  | 2.06 | 4.40e-46 | THO complex subunit 3                       |
|              |      |          | uncharacterized protein LOC112294206        |
| Pp3c6_7500   | 2.06 | 1.62e-09 | isoform X1                                  |
| Pp3c16_880   | 2.05 | 3.24e-22 | 20 kDa chaperonin, chloroplastic-like       |
|              |      |          | conserved oligomeric Golgi complex          |
| Pp3c27_6870  | 2.05 | 2.69e-25 | subunit 4-like                              |
| Pp3c26_5390  | 2.05 | 1.14e-06 | hypothetical protein PHYPA_000974           |
| Pp3c10_22510 | 2.05 | 1.63e-05 | hypothetical protein PHYPA_006105           |
| Pp3c5_8550   | 2.05 | 1.28e-11 | PITH domain-containing protein 1            |
| Pp3c23_2252  | 2.05 | 1.41e-05 | putative lipid-transfer protein DIR1        |
| Pp3c10_6930  | 2.05 | 2.91e-11 | tRNA (mo5U34)-methyltransferase             |
|              |      |          | DDB1- and CUL4-associated factor homolog    |
| Pp3c1_30760  | 2.04 | 5.56e-28 | 1                                           |
|              |      |          | enhancer of mRNA-decapping protein 4-       |
| Pp3c9_13290  | 2.04 | 4.30e-34 | like isoform X1                             |

|              |      |          |                                            |
|--------------|------|----------|--------------------------------------------|
| Pp3c25_330   | 2.04 | 1.20e-31 | hypothetical protein PHYPA_011541          |
| Pp3c11_9619  | 2.04 | 3.40e-04 | kinesin-like protein KIN-12B               |
| Pp3c6_1880   | 2.04 | 6.42e-18 | MLO-like protein 14                        |
| Pp3c11_9670  | 2.04 | 9.97e-23 | potassium channel GORK-like isoform X1     |
| Pp3c23_16640 | 2.04 | 5.76e-10 | predicted protein                          |
|              |      |          | transcriptional corepressor LEUNIG         |
| Pp3c15_2600  | 2.04 | 4.34e-05 | isoform X1                                 |
| Pp3c14_1030  | 2.03 | 2.69e-04 | ATP-dependent DNA helicase PIF1-like       |
| Pp3c22_22340 | 2.03 | 2.69e-10 | glucose-6-phosphate isomerase, cytosolic   |
|              |      |          | NADH-ubiquinone oxidoreductase 11 kDa      |
| Pp3c18_20910 | 2.03 | 2.70e-18 | subunit                                    |
|              |      |          | protein ZINC INDUCED FACILITATOR-          |
| Pp3c4_1560   | 2.03 | 5.19e-18 | LIKE 1-like isoform X4                     |
|              |      |          | ribulose biphosphate carboxylase small     |
| Pp3c14_12830 | 2.03 | 3.21e-12 | chain clone 512-like                       |
|              |      |          | RNA polymerase II-associated protein 3     |
| Pp3c7_229    | 2.03 | 6.38e-05 | isoform X1                                 |
| Pp3c6_5280   | 2.03 | 4.06e-35 | TMV resistance protein N-like              |
|              |      |          | 3-hydroxyisobutyryl-CoA hydrolase-like     |
| Pp3c24_690   | 2.02 | 7.06e-40 | protein 3, mitochondrial isoform X1        |
| Pp3c2_27810  | 2.02 | 1.04e-16 | dnaJ protein ERDJ3B-like                   |
|              |      |          | glucose-1-phosphate adenylyltransferase    |
| Pp3c16_9080  | 2.02 | 7.77e-05 | large subunit 1                            |
|              |      |          | glucose-6-phosphate/phosphate translocator |
| Pp3c19_18560 | 2.02 | 2.62e-03 | 1, chloroplastic-like                      |
| Pp3c14_4830  | 2.02 | 2.94e-22 | heat shock 70 kDa protein, mitochondrial   |
| Pp3c13_20650 | 2.02 | 3.73e-12 | hypothetical protein PHYPA_019112          |
| Pp3c27_4780  | 2.02 | 7.78e-03 | predicted protein                          |
| Pp3c17_5820  | 2.02 | 9.56e-11 | proton pump-interactor 1-like              |
|              |      |          | putative ion channel POLLUX-like 2         |
| Pp3c6_25090  | 2.02 | 1.36e-15 | isoform X1                                 |
|              |      |          | two-component response regulator-like      |
| Pp3c3_23850  | 2.02 | 2.74e-45 | PRR37 isoform X1                           |
| Pp3c22_16380 | 2.02 | 3.03e-33 | vegetative cell wall protein gp1-like      |
| Pp3c2_28350  | 2.01 | 2.66e-05 | AP-1 complex subunit gamma-2 isoform X1    |
| Pp3c23_14750 | 2.01 | 4.81e-15 | box C/D snoRNA protein 1                   |
| Pp3c6_2960   | 2.01 | 2.58e-07 | DNA polymerase delta catalytic subunit     |
| Pp3c14_13540 | 2.01 | 1.25e-03 | hypothetical protein PHYPA_017491          |
| Pp3c15_17070 | 2.01 | 1.17e-03 | magnesium transporter MRS2-3               |
| Pp3c3_27940  | 2.00 | 1.29e-16 | 4-coumarate--CoA ligase-like 5             |
| Pp3c7_17990  | 2.00 | 1.04e-20 | 50S ribosomal protein L19-1, chloroplastic |
| Pp3c2_30060  | 2.00 | 8.46e-17 | endonuclease V isoform X1                  |
| Pp3c26_10501 | 2.00 | 1.13e-06 | hypothetical protein PHYPA_011238          |
| Pp3c8_15610  | 2.00 | 2.41e-22 | hypothetical protein PHYPA_012807          |
| Pp3c4_27650  | 2.00 | 7.95e-78 | hypothetical protein PHYPA_020269          |
| Pp3c21_18820 | 2.00 | 4.47e-18 | hypothetical protein PHYPA_022665          |
| Pp3c5_4560   | 2.00 | 4.61e-14 | probable xyloglucan glycosyltransferase 5  |
| Pp3c13_19370 | 2.00 | 8.37e-06 | putative aconitate hydratase, cytoplasmic  |

**Supporting Information Table S2:** Complete list of downregulated genes in *Physcomitrium patens* during infection by *Colletotrichum gloeosporioides*.

| Sequence ID  | logFC | FDR       | Description                                                                               |
|--------------|-------|-----------|-------------------------------------------------------------------------------------------|
| Pp3c15_14300 | -6.04 | 1.21e-134 | scarecrow-like protein 28                                                                 |
| Pp3c11_6580  | -4.58 | 9.26e-139 | hypothetical protein PHYPA_009755                                                         |
| Pp3c8_21760  | -4.54 | 5.89e-39  | 6-phosphogluconate dehydrogenase,<br>decarboxylating 3                                    |
| Pp3c10_11330 | -4.14 | 9.52e-76  | phenylalanine ammonia-lyase-like                                                          |
| Pp3c5_9700   | -4.02 | 9.11e-29  | probable pectate lyase 5                                                                  |
| Pp3c18_14350 | -3.91 | 1.52e-63  | hypothetical protein PHYPA_005345                                                         |
| Pp3c16_19790 | -3.81 | 5.63e-18  | metal tolerance protein C2                                                                |
| Pp3c17_5760  | -3.68 | 5.79e-47  | glycerophosphodiester phosphodiesterase<br>GDPD1, chloroplastic                           |
| Pp3s350_10   | -3.52 | 9.98e-12  | high chlorophyll fluorescence phenotype<br>173                                            |
| Pp3c13_15640 | -3.41 | 8.28e-21  | endoplasmic reticulum oxidoreductin-1                                                     |
| Pp3c6_10090  | -3.40 | 1.25e-83  | probable glycosyltransferase At5g03795                                                    |
| Pp3c15_22920 | -3.39 | 6.59e-60  | DNA polymerase delta catalytic subunit-<br>like isoform X5                                |
| Pp3c13_13170 | -3.35 | 5.72e-152 | hypothetical protein PHYPA_019951                                                         |
| Pp3c13_16130 | -3.32 | 7.40e-89  | Mitochondrial import inner membrane<br>translocase subunit tim-10 isoform 1               |
| Pp3c13_15980 | -3.32 | 3.57e-91  | hypothetical protein PHYPA_019196                                                         |
| trnG         | -3.28 | 3.32e-17  | PSII L-protein                                                                            |
| Pp3c24_13310 | -3.24 | 6.58e-15  | hypothetical protein PHYPA_018322                                                         |
| Pp3c22_16100 | -3.21 | 1.29e-38  | nuclear speckle RNA-binding protein B-like                                                |
| Pp3c19_3900  | -3.21 | 4.17e-45  | protein NLP1                                                                              |
| Pp3c4_8580   | -3.21 | 6.56e-20  | Sorghum bicolor protein targeted either to<br>mitochondria or chloroplast proteins T50848 |
| Pp3c26_5590  | -3.20 | 2.82e-75  | LEC14B protein                                                                            |
| Pp3c20_17620 | -3.19 | 2.69e-34  | hypothetical protein PHYPA_027962                                                         |
| Pp3c13_15800 | -3.18 | 4.44e-89  | Protein terminal ear1-like                                                                |
| Pp3c10_25150 | -3.18 | 1.12e-12  | Retrovirus-related Pol polyprotein from<br>transposon TNT 1-94                            |
| Pp3c1_17080  | -3.18 | 4.91e-55  | hypothetical protein PHYPA_018188                                                         |
| trnL         | -3.16 | 1.08e-04  | .                                                                                         |
| Pp3c13_16000 | -3.13 | 2.12e-84  | uncharacterized protein LOC112292868                                                      |
| Pp3c10_6880  | -3.11 | 2.58e-52  | protein odr-4 homolog                                                                     |
| Pp3c13_15786 | -3.11 | 4.92e-91  | hypothetical protein PHYPA_020096                                                         |
| Pp3c18_18100 | -3.10 | 1.97e-19  | E3 ubiquitin-protein ligase PRT6-like<br>isoform X2                                       |
| Pp3c8_8000   | -3.06 | 5.41e-28  | uncharacterized protein LOC112286360                                                      |
| Pp3c24_8390  | -3.05 | 2.56e-33  | reverse transcriptase                                                                     |
| Pp3c16_21250 | -3.03 | 1.38e-51  | probable thimet oligopeptidase isoform X1                                                 |
| Pp3c2_19460  | -3.01 | 2.72e-16  | NDR1/HIN1-like protein 6 isoform X1                                                       |
| trnE         | -3.00 | 2.85e-03  | PSII protein                                                                              |
| Pp3c23_6560  | -2.99 | 4.77e-11  | proteasome subunit beta type-5                                                            |



|              |       |           |                                                                       |
|--------------|-------|-----------|-----------------------------------------------------------------------|
| Pp3c16_19230 | -2.99 | 6.68e-40  | xyloglucan galactosyltransferase XLT2-like                            |
| Pp3c12_14210 | -2.99 | 1.68e-07  | uncharacterized protein LOC112285213                                  |
| Pp3c13_16030 | -2.96 | 3.70e-14  | ribulose biphosphate carboxylase small chain clone 512-like           |
| Pp3c21_18980 | -2.95 | 6.68e-72  | hypothetical protein PHYPA_031026                                     |
| Pp3c17_21350 | -2.93 | 2.27e-18  | nucleolar and coiled-body phosphoprotein 1-like                       |
| Pp3c3_10731  | -2.93 | 1.34e-12  | thioredoxin peroxidase 1                                              |
| Pp3c10_3130  | -2.90 | 1.60e-32  | UPF0187 protein At3g61320, chloroplastic-like                         |
| Pp3c1_35321  | -2.89 | 1.08e-11  | CLP protease regulatory subunit CLPX1, mitochondrial isoform X2       |
| Pp3c22_7170  | -2.88 | 2.22e-20  | hypothetical protein PHYPA_007440                                     |
| Pp3c13_10520 | -2.87 | 2.63e-17  | transcription factor EGL1-like                                        |
| Pp3c14_9180  | -2.86 | 1.42e-68  | YDG domain-containing protein At5g47150-like                          |
| Pp3c13_15790 | -2.85 | 3.51e-32  | phosphatidylinositol glycan anchor biosynthesis class U protein-like  |
| Pp3c1_13170  | -2.85 | 9.16e-73  | hypothetical protein PHYPA_018919                                     |
| Pp3c20_2280  | -2.83 | 1.90e-32  | filament-like plant protein 4 isoform X1                              |
| Pp3c1_2420   | -2.83 | 3.13e-55  | probable pectate lyase 5                                              |
| Pp3c3_10730  | -2.82 | 7.46e-12  | 4-hydroxy-tetrahydrodipicolinate synthase, chloroplastic              |
| Pp3c6_23040  | -2.82 | 4.29e-53  | BRCT domain-containing protein                                        |
| Pp3c9_5280   | -2.82 | 4.54e-112 | probable apyrase 7                                                    |
| Pp3c19_20760 | -2.82 | 7.45e-18  | probable tyrosine-protein phosphatase DG1060                          |
| trnV         | -2.81 | 4.11e-09  | PSI I-protein                                                         |
| Pp3c4_16840  | -2.80 | 9.96e-41  | putative 4-hydroxy-4-methyl-2-oxoglutarate aldolase 3                 |
| Pp3c13_21590 | -2.80 | 8.95e-53  | hypothetical protein PHYPA_019302                                     |
| Pp3c4_17610  | -2.79 | 5.29e-34  | glutamate synthase 1 [NADH], chloroplastic isoform X1                 |
| Pp3c1_42230  | -2.79 | 5.62e-15  | pyrophosphate--fructose 6-phosphate 1-phosphotransferase subunit beta |
| Pp3c16_22640 | -2.77 | 2.44e-14  | probable membrane metalloprotease ARASP2, chloroplastic               |
| Pp3c1_42420  | -2.77 | 1.73e-14  | hypothetical protein PHYPA_001911, partial                            |
| Pp3c12_24970 | -2.76 | 5.42e-87  | nuclear transcription factor Y subunit A-7 isoform X1                 |
| Pp3c4_1550   | -2.75 | 2.86e-29  | zinc finger CCCH domain-containing protein 64                         |
| Pp3c11_4850  | -2.74 | 1.32e-91  | GDP-fucose protein O-fucosyltransferase                               |
| Pp3c26_9830  | -2.73 | 1.59e-07  | bifunctional riboflavin kinase/FMN phosphatase                        |
| Pp3c26_15000 | -2.73 | 4.40e-23  | E3 ubiquitin-protein ligase HERC2-like isoform X1                     |

|              |       |          |                                                                              |
|--------------|-------|----------|------------------------------------------------------------------------------|
| Pp3c3_11210  | -2.73 | 1.02e-29 | probable xyloglucan<br>endotransglucosylase/hydrolase protein 5              |
| Pp3c13_23730 | -2.72 | 9.69e-21 | chromodomain-helicase-DNA-binding<br>protein 9-like isoform X1               |
| Pp3c4_1450   | -2.71 | 1.98e-20 | ethylene-responsive transcription factor<br>ERF043-like                      |
| Pp3c15_2630  | -2.71 | 1.12e-14 | maturase-related protein (mitochondrion)                                     |
| Pp3c20_21990 | -2.71 | 2.06e-09 | hypothetical protein PHYPA_022593                                            |
| Pp3c4_510    | -2.70 | 6.73e-27 | NAD(P)H-quinone oxidoreductase subunit<br>N, chloroplastic                   |
| Pp3c1_33180  | -2.70 | 8.10e-12 | protein JINGUBANG-like                                                       |
| Pp3c7_14650  | -2.70 | 2.49e-14 | hypothetical protein PHYPA_021858                                            |
| Pp3c21_9970  | -2.69 | 4.92e-93 | long chain base biosynthesis protein 2a                                      |
| Pp3c6_21520  | -2.69 | 9.50e-45 | hypothetical protein PHYPA_021944                                            |
| Pp3c8_19540  | -2.68 | 3.22e-65 | B3 domain-containing protein<br>Os11g0197600-like                            |
| Pp3c3_32420  | -2.67 | 9.05e-37 | hypothetical protein PHYPA_023159                                            |
| Pp3c3_15560  | -2.67 | 1.76e-24 | uncharacterized protein LOC112284081                                         |
| Pp3c17_1110  | -2.66 | 1.38e-69 | BUD13 homolog                                                                |
| Pp3c1_30790  | -2.66 | 2.53e-29 | hypothetical protein PHYPA_000579                                            |
| Pp3c7_18910  | -2.65 | 8.53e-06 | abnormal spindle-like microcephaly-<br>associated protein homolog isoform X1 |
| Pp3c7_14450  | -2.65 | 3.37e-66 | retrotransposon protein, putative, Ty1-copia<br>subclass                     |
| trnY         | -2.65 | 3.75e-10 | ribulose-1,5-bisphosphate<br>carboxylase/oxygenase large subunit             |
| Pp3c20_23430 | -2.64 | 2.79e-63 | triacylglycerol lipase 2-like                                                |
| Pp3c19_5170  | -2.63 | 1.87e-31 | uncharacterized protein LOC112273267<br>isoform X1                           |
| Pp3c1_3940   | -2.62 | 1.69e-16 | predicted protein                                                            |
| Pp3c16_2280  | -2.62 | 2.50e-14 | hypothetical protein PHYPA_024324                                            |
| Pp3c19_10230 | -2.62 | 3.16e-45 | uncharacterized protein LOC112273105                                         |
| Pp3c11_9120  | -2.61 | 5.03e-58 | copalyl diphosphate synthase 1-like isoform<br>X1                            |
| Pp3c23_1130  | -2.61 | 9.64e-42 | Retrovirus-related Pol polyprotein from<br>transposon TNT 1-94               |
| Pp3c10_16560 | -2.61 | 6.18e-75 | hypothetical protein PHYPA_030281                                            |
| matK         | -2.60 | 1.12e-30 | ribosomal protein L22                                                        |
| Pp3c2_13970  | -2.58 | 1.37e-30 | U11/U12 small nuclear ribonucleoprotein 35<br>kDa protein                    |
| Pp3c11_4920  | -2.57 | 3.58e-24 | probable methyltransferase PMT21                                             |
| Pp3c25_9350  | -2.54 | 5.15e-53 | hypothetical protein PHYPA_011202                                            |
| Pp3c19_10340 | -2.54 | 1.02e-33 | hypothetical protein PHYPA_024550                                            |
| Pp3c20_2620  | -2.54 | 8.90e-42 | uncharacterized protein LOC112275494                                         |
| Pp3c19_14070 | -2.53 | 2.14e-68 | RING/FYVE/PHD zinc finger superfamily<br>protein                             |
| Pp3c16_20090 | -2.53 | 1.75e-20 | hypothetical protein PHYPA_024218                                            |
| Pp3c4_14700  | -2.52 | 5.86e-45 | protein TIFY 6a-like                                                         |

|              |       |           |                                                                           |
|--------------|-------|-----------|---------------------------------------------------------------------------|
| Pp3c9_5310   | -2.52 | 8.46e-101 | hypothetical protein PHYPA_025947, partial                                |
| Pp3c1_29500  | -2.51 | 1.77e-28  | LRR receptor-like serine/threonine-protein kinase FLS2                    |
| Pp3c3_2620   | -2.51 | 1.95e-67  | ubiquitin-like-specific protease 1D                                       |
| trnK         | -2.50 | 4.85e-32  | ribosomal protein L21                                                     |
| Pp3c20_1150  | -2.49 | 1.65e-15  | predicted protein                                                         |
| Pp3c19_20080 | -2.49 | 2.31e-128 | uncharacterized protein LOC112273157                                      |
| Pp3c5_28500  | -2.48 | 1.12e-62  | catalase isozyme 2-like                                                   |
| Pp3c15_19080 | -2.48 | 6.27e-29  | cationic amino acid transporter 2, vacuolar-like                          |
| Pp3c16_19430 | -2.48 | 5.97e-20  | hypothetical protein PHYPA_024188                                         |
| Pp3c9_4760   | -2.48 | 5.34e-40  | hypothetical protein PHYPA_025921                                         |
| Pp3c5_640    | -2.48 | 6.54e-35  | hypothetical protein PHYPA_027224                                         |
| Pp3c11_6250  | -2.47 | 9.78e-33  | glycosyltransferase-like protein                                          |
| Pp3c20_20120 | -2.47 | 5.58e-17  | myosin-2 heavy chain-like                                                 |
| Pp3c7_21370  | -2.47 | 6.47e-12  | paired amphipathic helix protein Sin3-like 4 isoform X1                   |
| atpB         | -2.47 | 1.09e-55  | PSI P700 apoprotein A1                                                    |
| Pp3c2_19150  | -2.47 | 6.73e-14  | hypothetical protein PHYPA_016583                                         |
| Pp3c15_22730 | -2.46 | 1.72e-61  | GDSL esterase/lipase At4g16230-like                                       |
| Pp3c4_11854  | -2.46 | 2.70e-56  | HMG1/2-like protein                                                       |
| Pp3c5_3210   | -2.46 | 2.33e-66  | probable non-specific lipid-transfer protein AKCS9                        |
| Pp3c2_4100   | -2.46 | 3.93e-13  | putative receptor protein kinase CRINKLY4                                 |
| Pp3c25_1840  | -2.46 | 3.74e-52  | hypothetical protein PHYPA_011444                                         |
| Pp3c4_23200  | -2.45 | 3.96e-08  | predicted protein                                                         |
| Pp3c9_5060   | -2.45 | 1.22e-77  | probable xyloglucan                                                       |
|              |       |           | endotransglucosylase/hydrolase protein 27                                 |
| Pp3c15_22720 | -2.45 | 3.95e-64  | hypothetical protein PHYPA_003359                                         |
| Pp3c8_14190  | -2.44 | 5.77e-44  | diphthine methyltransferase homolog                                       |
| Pp3c12_22390 | -2.44 | 1.82e-45  | probable protein phosphatase 2C 51 isoform X1                             |
| Pp3c27_5030  | -2.44 | 3.07e-95  | protein fluG-like                                                         |
| Pp3c19_12910 | -2.44 | 1.60e-53  | transmembrane protein 53                                                  |
| Pp3c3_16280  | -2.44 | 1.96e-28  | V-type proton ATPase subunit D-like                                       |
| Pp3c3_36450  | -2.43 | 1.66e-20  | hypothetical protein PHYPA_023346                                         |
| Pp3c3_25110  | -2.43 | 3.34e-63  | hypothetical protein PHYPA_029660                                         |
| Pp3c1_42250  | -2.42 | 4.33e-10  | 60S ribosomal protein L7-2                                                |
| Pp3c16_5630  | -2.42 | 4.61e-12  | AC091247_1putative polyprotein, 5'-                                       |
| Pp3c4_13150  | -2.41 | 3.30e-22  | cytochrome c oxidase assembly protein COX11, mitochondrial                |
| Pp3s775_10   | -2.41 | 3.55e-04  | hypothetical protein PHYPA_021160                                         |
| Pp3c19_14710 | -2.41 | 6.52e-38  | hypothetical protein PHYPA_025308                                         |
| Pp3c4_30220  | -2.40 | 3.46e-30  | bifunctional aspartokinase/homoserine dehydrogenase 1, chloroplastic-like |
| Pp3c2_17510  | -2.40 | 1.05e-23  | Proline-rich protein 1                                                    |
| Pp3c10_17170 | -2.40 | 4.49e-11  | WEB family protein At1g12150-like                                         |
| Pp3c4_13140  | -2.40 | 3.60e-22  | hypothetical protein PHYPA_020859                                         |

|              |       |           |                                                                        |
|--------------|-------|-----------|------------------------------------------------------------------------|
| Pp3c19_11600 | -2.40 | 1.87e-71  | hypothetical protein PHYPA_025188                                      |
| Pp3c2_9980   | -2.39 | 5.43e-29  | glycerol-3-phosphate 2-O-acyltransferase 6-like                        |
| Pp3c13_4170  | -2.39 | 1.87e-15  | Retrovirus-related Pol polyprotein from transposon TNT 1-94            |
| Pp3c12_4580  | -2.39 | 3.26e-25  | hypothetical protein PHYPA_019588                                      |
| Pp3c12_7010  | -2.39 | 3.61e-21  | hypothetical protein PHYPA_019679, partial                             |
| Pp3c1_22450  | -2.39 | 2.01e-81  | ---NA---                                                               |
| atpE         | -2.38 | 3.71e-59  | PSI P700 apoprotein A2                                                 |
| Pp3c19_3732  | -2.38 | 3.56e-07  | serine/threonine-protein phosphatase 4 regulatory subunit 2 isoform X2 |
| Pp3c20_18320 | -2.38 | 7.05e-28  | hypothetical protein PHYPA_028003, partial                             |
| Pp3c3_24631  | -2.37 | 4.78e-08  | F-box protein At2g26850-like                                           |
| Pp3c25_6730  | -2.37 | 1.02e-69  | pumilio homolog 1-like                                                 |
| Pp3c7_27000  | -2.37 | 2.28e-61  | Putative non-structural 4                                              |
| Pp3c13_23660 | -2.37 | 1.58e-16  | hypothetical protein PHYPA_019393                                      |
| Pp3c6_16970  | -2.36 | 3.44e-29  | ras-related protein RABH1e                                             |
| Pp3c23_1972  | -2.36 | 2.57e-13  | SUN domain-containing protein 1                                        |
| Pp3c4_8470   | -2.36 | 7.29e-77  | transcription factor bHLH49-like                                       |
| Pp3c3_24618  | -2.35 | 3.19e-12  | golgin subfamily A member 4-like isoform X1                            |
| Pp3c15_21090 | -2.35 | 2.20e-06  | probable 1-deoxy-D-xylulose-5-phosphate synthase, chloroplastic        |
| Pp3c3_25080  | -2.35 | 4.13e-38  | sialidase-like isoform X2                                              |
| Pp3c16_11740 | -2.35 | 5.83e-119 | Transmembrane protein                                                  |
| Pp3c22_6380  | -2.34 | 6.93e-83  | ethylene-responsive transcription factor                               |
| Pp3c22_17930 | -2.34 | 2.91e-36  | Retrovirus-related Pol polyprotein from transposon TNT 1-94            |
| Pp3c1_31440  | -2.34 | 1.82e-65  | Ribosomal protein L23/L15e family protein, putative                    |
| Pp3c24_20800 | -2.34 | 1.89e-37  | subtilisin-like protease SBT2.5                                        |
| Pp3c21_4230  | -2.33 | 1.68e-52  | kinesin-like protein KIN-12E                                           |
| Pp3c20_13600 | -2.33 | 3.48e-18  | putative lipoate-protein ligase A                                      |
| Pp3c12_9500  | -2.32 | 2.64e-67  | ubiquitin carboxyl-terminal hydrolase 12                               |
| Pp3c4_3720   | -2.31 | 1.38e-64  | probable amino-acid acetyltransferase NAGS1, chloroplastic             |
| Pp3c13_6570  | -2.31 | 2.65e-59  | protease Do-like 9                                                     |
| Pp3c4_22170  | -2.31 | 1.39e-12  | reverse transcriptase                                                  |
| Pp3c22_14530 | -2.31 | 1.48e-80  | TMV resistance protein N-like                                          |
| Pp3c16_4550  | -2.31 | 7.45e-63  | hypothetical protein PHYPA_023635                                      |
| Pp3c15_14090 | -2.30 | 3.26e-10  | importin subunit alpha-1-like isoform X1                               |
| Pp3c3_38220  | -2.30 | 3.90e-12  | protein SUPPRESSOR OF npr1-1, CONSTITUTIVE 1-like                      |
| Pp3c9_19520  | -2.30 | 1.78e-57  | hypothetical protein PHYPA_026402                                      |
| Pp3c4_20230  | -2.29 | 3.17e-67  | disease resistance protein TAO1-like                                   |
| Pp3c16_21270 | -2.29 | 1.53e-14  | fasciclin-like protein                                                 |
| Pp3c18_14800 | -2.29 | 1.30e-27  | peroxidase A2-like                                                     |
| Pp3c3_37470  | -2.29 | 2.31e-41  | protein PHR1-LIKE 2-like isoform X1                                    |

|              |       |           |                                                                 |
|--------------|-------|-----------|-----------------------------------------------------------------|
| Pp3c19_20070 | -2.29 | 8.81e-78  | sulphydryl oxidase 2-like isoform X1                            |
| Pp3c6_3820   | -2.29 | 6.75e-07  | transcription factor MYB3R-5-like isoform X3                    |
| Pp3c14_20830 | -2.28 | 8.11e-73  | mediator of RNA polymerase II transcription subunit 31-like     |
| Pp3c23_6900  | -2.28 | 2.12e-13  | protein DOG1-like 3                                             |
| Pp3c23_2010  | -2.28 | 3.63e-24  | UPF0643 protein PB2B2.08-like                                   |
| Pp3c12_11700 | -2.28 | 7.54e-58  | hypothetical protein PHYPA_022665                               |
| Pp3c23_14000 | -2.27 | 9.13e-08  | biotin synthase                                                 |
| Pp3c3_31900  | -2.27 | 2.69e-21  | histone H3.3 isoform X1                                         |
| Pp3c5_12950  | -2.27 | 2.27e-13  | probable pectinesterase 53                                      |
| Pp3c25_400   | -2.27 | 2.98e-40  | protein TSS                                                     |
| Pp3c1_8210   | -2.27 | 3.49e-23  | UPF0051 protein in atpA 3'region-like                           |
| Pp3c19_17080 | -2.26 | 8.24e-28  | Alpha-D-phosphohexomutase superfamily                           |
| Pp3c3_29550  | -2.26 | 6.85e-31  | DNA repair endonuclease UVH1 isoform X1                         |
| Pp3c11_10950 | -2.26 | 2.29e-45  | myb family transcription factor PHL7-like                       |
| Pp3c15_12410 | -2.26 | 1.24e-73  | ras-related protein RABC1-like                                  |
| Pp3c3_24600  | -2.26 | 4.31e-13  | transmembrane emp24 domain-containing protein p24beta2-like     |
| Pp3c5_2110   | -2.26 | 1.50e-16  | hypothetical protein PHYPA_013425                               |
| Pp3c16_4520  | -2.26 | 4.74e-57  | hypothetical protein PHYPA_023633                               |
| Pp3c16_8630  | -2.26 | 9.32e-24  | hypothetical protein PHYPA_023856                               |
| Pp3c13_18780 | -2.25 | 2.31e-24  | AT-rich interactive domain-containing protein 3-like isoform X1 |
| Pp3c25_1450  | -2.25 | 9.26e-48  | conserved oligomeric Golgi complex subunit 3                    |
| Pp3c16_3320  | -2.25 | 1.18e-11  | cytochrome c                                                    |
| Pp3c6_6460   | -2.25 | 1.03e-32  | iron-sulfur cluster assembly protein 1-like                     |
| Pp3c16_3930  | -2.25 | 4.91e-48  | serine/threonine-protein kinase BSK1-like isoform X1            |
| Pp3c24_12360 | -2.25 | 3.71e-62  | hypothetical protein PHYPA_014819, partial                      |
| Pp3c3_35020  | -2.24 | 5.79e-28  | C2 domain-containing protein At1g53590-like                     |
| Pp3c5_14300  | -2.24 | 1.36e-47  | HECT-domain-containing protein                                  |
| Pp3c16_10550 | -2.24 | 2.37e-56  | plastid division protein PDV2-like                              |
| Pp3c19_4310  | -2.24 | 2.93e-25  | predicted protein                                               |
| Pp3c5_8580   | -2.24 | 3.44e-16  | probable sucrose-phosphatase 2 isoform X1                       |
| Pp3c4_3730   | -2.24 | 1.71e-30  | hypothetical protein PHYPA_013738                               |
| Pp3c1_18860  | -2.24 | 7.14e-46  | hypothetical protein PHYPA_031299                               |
| Pp3c11_10480 | -2.24 | 2.27e-61  | uncharacterized protein LOC112280916                            |
| Pp3c19_3840  | -2.23 | 1.33e-100 | AUGMIN subunit3                                                 |
| Pp3c23_2890  | -2.23 | 2.44e-12  | lysophospholipid acyltransferase LPEAT1 isoform X1              |
| Pp3c2_24270  | -2.23 | 2.17e-57  | plant intracellular Ras-group-related LRR protein 1-like        |
| Pp3c12_5820  | -2.23 | 9.37e-10  | hypothetical protein PHYPA_019644                               |
| Pp3c20_22420 | -2.23 | 5.20e-69  | uncharacterized protein LOC112275598                            |

|              |       |          |                                                                                  |
|--------------|-------|----------|----------------------------------------------------------------------------------|
| Pp3c11_15160 | -2.22 | 3.19e-24 | 26S proteasome non-ATPase regulatory subunit 11 homolog                          |
| Pp3c2_28940  | -2.22 | 2.04e-19 | 60S ribosomal protein L21-1                                                      |
| Pp3c16_8870  | -2.22 | 7.86e-08 | probable 26S proteasome subunit YTA6 isoform X1                                  |
| Pp3c3_6760   | -2.22 | 1.48e-12 | RHOMBOID-like protein 13                                                         |
| Pp3c20_13120 | -2.22 | 1.36e-53 | hypothetical protein AXX17_ATUG04770                                             |
| Pp3s116_10   | -2.22 | 6.07e-68 | hypothetical protein PHYPA_000255                                                |
| Pp3c25_1440  | -2.22 | 5.90e-63 | hypothetical protein PHYPA_018282                                                |
| Pp3c20_4990  | -2.22 | 5.06e-59 | hypothetical protein PHYPA_028382, partial                                       |
| Pp3c6_11210  | -2.22 | 1.27e-40 | uncharacterized protein LOC112275223                                             |
| Pp3c9_19800  | -2.21 | 3.62e-38 | dnaJ protein homolog                                                             |
| Pp3c9_20000  | -2.21 | 4.60e-21 | microtubule-associated protein 70-1-like                                         |
| Pp3c11_10680 | -2.21 | 6.00e-69 | probable 3-hydroxyisobutyrate dehydrogenase-like 1, mitochondrial                |
| Pp3c3_3230   | -2.21 | 3.34e-07 | ribosome biogenesis protein BOP1 homolog                                         |
| Pp3c20_4670  | -2.21 | 3.99e-34 | Serine/threonine protein phosphatase 2A 55 kDa regulatory subunit B beta isoform |
| Pp3c18_9930  | -2.20 | 7.63e-12 | 12-oxophytodienoate reductase 3                                                  |
| Pp3c19_5900  | -2.20 | 4.31e-10 | beta-amylase 2, chloroplastic-like                                               |
| Pp3c24_12430 | -2.20 | 7.53e-21 | biotin carboxyl carrier protein of acetyl-CoA carboxylase                        |
| Pp3s242_10   | -2.20 | 5.18e-56 | mitochondrial dicarboxylate/tricarboxylate transporter DTC                       |
| Pp3c3_1650   | -2.20 | 1.17e-08 | TMV resistance protein N-like                                                    |
| Pp3c21_9980  | -2.20 | 6.01e-98 | hypothetical protein PHYPA_007864                                                |
| Pp3c2_24160  | -2.20 | 7.76e-60 | uncharacterized protein LOC112289304                                             |
| Pp3c14_3220  | -2.19 | 2.81e-04 | elongation factor 1-alpha-like                                                   |
| Pp3c5_10730  | -2.19 | 7.90e-53 | GDSL esterase/lipase At5g55050-like                                              |
| Pp3c24_8780  | -2.19 | 3.51e-35 | protein translocase subunit SECA2, chloroplastic isoform X2                      |
| Pp3c11_21460 | -2.19 | 2.26e-14 | UPF0613 protein PB24D3.06c                                                       |
| Pp3c6_20300  | -2.19 | 4.00e-47 | WD40 repeat-like protein                                                         |
| Pp3c11_23670 | -2.18 | 3.74e-52 | chloroplast envelope membrane protein-like                                       |
| Pp3c19_4313  | -2.18 | 2.92e-23 | dynein heavy chain 7, axonemal-like                                              |
| Pp3s116_40   | -2.18 | 7.11e-55 | RGG repeats nuclear RNA binding protein A-like                                   |
| Pp3c11_4830  | -2.18 | 1.20e-14 | vegetative cell wall protein gp1-like                                            |
| Pp3c10_3020  | -2.18 | 5.87e-70 | hypothetical protein PHYPA_005627                                                |
| Pp3c20_8260  | -2.18 | 1.91e-48 | hypothetical protein PHYPA_027651                                                |
| Pp3c22_11130 | -2.17 | 3.07e-12 | Drug/metabolite transporter                                                      |
| Pp3c16_12600 | -2.17 | 1.74e-44 | galactan beta-1,4-galactosyltransferase GALS1-like                               |
| Pp3c13_5930  | -2.17 | 2.39e-56 | heat shock protein 83                                                            |
| Pp3c5_7150   | -2.17 | 5.36e-47 | KAT8 regulatory NSL complex subunit 3                                            |
| Pp3c21_12100 | -2.17 | 1.47e-92 | LRR receptor-like serine/threonine-protein kinase GSO1 isoform X1                |
| Pp3c20_1900  | -2.17 | 5.53e-18 | peroxisomal 2,4-dienoyl-CoA reductase-like                                       |

|              |       |          |                                                                              |
|--------------|-------|----------|------------------------------------------------------------------------------|
| Pp3c3_29530  | -2.17 | 2.78e-28 | probable splicing factor 3A subunit 1                                        |
| Pp3c7_120    | -2.17 | 7.82e-32 | protein ENHANCED DISEASE<br>RESISTANCE 2-like                                |
| trnF         | -2.17 | 1.56e-04 | PSII 47kDa protein                                                           |
| Pp3c19_1490  | -2.17 | 1.28e-30 | universal stress protein PHOS34-like                                         |
| Pp3c14_12070 | -2.17 | 9.16e-60 | hypothetical protein PHYPA_017420                                            |
| Pp3c17_20310 | -2.16 | 7.77e-42 | ethylene-responsive transcription factor<br>ERF084-like                      |
| Pp3c22_2660  | -2.16 | 4.68e-27 | GA20 oxidase-like protein                                                    |
| Pp3c26_1140  | -2.16 | 3.56e-20 | nuclear-pore anchor                                                          |
| Pp3c5_7180   | -2.16 | 1.16e-46 | phenylalanine ammonia-lyase-like                                             |
| Pp3c22_7690  | -2.16 | 6.71e-88 | predicted protein                                                            |
| Pp3c3_34790  | -2.16 | 4.39e-51 | hypothetical protein PHYPA_023263                                            |
| Pp3c5_7110   | -2.16 | 4.27e-47 | uncharacterized protein LOC112274862<br>isoform X2                           |
| Pp3c12_20650 | -2.15 | 2.35e-62 | condensin complex subunit 2-like                                             |
| Pp3c22_10850 | -2.15 | 1.36e-51 | disease resistance-like protein CSA1                                         |
| Pp3c6_26200  | -2.15 | 4.46e-35 | histone H2B.8-like                                                           |
| Pp3c17_14680 | -2.15 | 7.98e-50 | inactive protein kinase<br>SELMODRAFT_444075-like                            |
| Pp3c26_630   | -2.15 | 2.18e-43 | predicted protein                                                            |
| Pp3c1_7380   | -2.15 | 8.56e-88 | probable protein phosphatase 2C 15 isoform<br>X1                             |
| Pp3c6_200    | -2.15 | 2.02e-12 | Retrovirus-related Pol polyprotein from<br>transposon TNT 1-94               |
| Pp3c17_14681 | -2.15 | 6.89e-50 | hypothetical protein PHYPA_004393                                            |
| Pp3c11_2650  | -2.15 | 1.38e-33 | hypothetical protein PHYPA_009679                                            |
| Pp3c24_13190 | -2.14 | 4.89e-15 | 60S ribosomal protein L28-1-like                                             |
| Pp3c11_12080 | -2.14 | 9.75e-70 | eukaryotic translation initiation factor 3<br>subunit C-like                 |
| Pp3c6_6830   | -2.14 | 1.15e-57 | F-box protein At1g47056-like                                                 |
| Pp3c20_15220 | -2.14 | 1.27e-13 | ---NA---                                                                     |
| Pp3c18_13090 | -2.14 | 1.20e-46 | uncharacterized protein LOC112279900                                         |
| Pp3s1006_30  | -2.14 | 2.30e-04 | uncharacterized protein LOC112290578<br>isoform X3                           |
| Pp3c12_15820 | -2.13 | 3.63e-30 | FT-interacting protein 1-like                                                |
| Pp3c1_32200  | -2.13 | 2.40e-50 | germin-like protein 1-3                                                      |
| Pp3c10_15730 | -2.13 | 1.50e-86 | polyadenylate-binding protein-interacting<br>protein 7-like                  |
| Pp3c5_19300  | -2.13 | 2.96e-25 | hypothetical protein PHYPA_013332                                            |
| Pp3c1_27990  | -2.13 | 1.45e-73 | uncharacterized protein LOC112285443<br>isoform X1                           |
| Pp3c25_15260 | -2.12 | 1.67e-50 | CAX-interacting protein 4-like                                               |
| Pp3c16_15270 | -2.12 | 1.57e-79 | DEAD-box ATP-dependent RNA helicase<br>42                                    |
| Pp3c7_23980  | -2.12 | 2.66e-84 | DNA-(apurinic or apyrimidinic site) lyase                                    |
| Pp3c21_6200  | -2.12 | 4.59e-19 | Glycosyl hydrolase, five-bladed beta-<br>propellor domain-containing protein |

|              |       |          |                                                                     |
|--------------|-------|----------|---------------------------------------------------------------------|
| Pp3c13_20640 | -2.12 | 1.79e-30 | Prestalk-specific protein tagB                                      |
| Pp3c10_4440  | -2.12 | 2.56e-27 | probable protein phosphatase 2C 60 isoform X1                       |
| Pp3c18_8820  | -2.12 | 4.66e-61 | Retrovirus-related Pol polyprotein from transposon TNT 1-94         |
| Pp3c15_16700 | -2.12 | 9.37e-46 | ribosomal protein L16 (mitochondrion)                               |
| Pp3c23_1980  | -2.12 | 5.75e-15 | sodium-dependent phosphate transport protein 1, chloroplastic       |
| Pp3c2_4940   | -2.12 | 1.08e-18 | uncharacterized endoplasmic reticulum membrane protein YGL010W-like |
| Pp3c4_28370  | -2.12 | 1.79e-69 | vasohibin-2 isoform X3                                              |
| Pp3c13_15240 | -2.12 | 4.59e-13 | hypothetical protein PHYPA_020063                                   |
| Pp3c3_35180  | -2.11 | 1.21e-70 | lanC-like protein GCL1                                              |
| Pp3c9_19950  | -2.11 | 1.01e-31 | putative clathrin assembly protein At5g35200                        |
| Pp3c4_31680  | -2.11 | 1.02e-06 | RNA helicase nonsense mRNA reducing factor                          |
| Pp3c13_2310  | -2.11 | 7.83e-43 | SAL1 phosphatase-like                                               |
| Pp3c2_22630  | -2.11 | 1.37e-33 | hypothetical protein PHYPA_015741                                   |
| Pp3c1_1330   | -2.11 | 4.93e-64 | hypothetical protein PHYPA_018926                                   |
| Pp3c7_24650  | -2.11 | 9.44e-38 | hypothetical protein PHYPA_029322, partial                          |
| Pp3c20_5760  | -2.11 | 2.29e-51 | ---NA---                                                            |
| Pp3c7_11090  | -2.10 | 5.50e-57 | aspartyl protease family protein 2-like                             |
| Pp3c24_18690 | -2.10 | 4.38e-40 | autophagy-related protein 8C                                        |
| Pp3c14_11030 | -2.10 | 6.64e-70 | calnexin homolog                                                    |
| Pp3c8_5370   | -2.10 | 9.00e-33 | F-box only protein 6-like                                           |
| Pp3c4_8171   | -2.10 | 6.22e-64 | hydroxyproline O-arabinosyltransferase 3-like                       |
| Pp3c6_18710  | -2.10 | 1.81e-39 | proteasome subunit alpha type-7                                     |
| Pp3c12_22330 | -2.10 | 8.35e-06 | protein ECERIFERUM 3                                                |
| Pp3c26_6740  | -2.10 | 3.75e-36 | serine carboxypeptidase-like                                        |
| Pp3c12_9890  | -2.10 | 3.14e-49 | serine/threonine-protein kinase HT1-like                            |
| Pp3c7_11100  | -2.10 | 5.63e-56 | trihelix transcription factor ASR3-like                             |
| Pp3c18_13350 | -2.10 | 2.53e-23 | ---NA---                                                            |
| Pp3c10_9740  | -2.09 | 6.07e-68 | casein kinase 1-like protein 1                                      |
| Pp3c7_22220  | -2.09 | 1.12e-07 | pol-like protein                                                    |
| Pp3c1_4010   | -2.09 | 8.23e-53 | U-box domain-containing protein 43-like                             |
| Pp3c27_6070  | -2.09 | 1.27e-17 | hypothetical protein PHYPA_001573, partial                          |
| Pp3c7_12850  | -2.09 | 1.50e-42 | hypothetical protein PHYPA_021789                                   |
| Pp3c19_12750 | -2.09 | 4.88e-39 | hypothetical protein PHYPA_025225                                   |
| Pp3c14_7930  | -2.08 | 7.74e-25 | aldehyde oxidase GLOX-like                                          |
| Pp3c17_4440  | -2.08 | 1.21e-10 | arginyl-tRNA--protein transferase 2-like                            |
| Pp3c12_5220  | -2.08 | 7.77e-15 | enoyl-[acyl-carrier-protein] reductase [NADH] 1, chloroplastic-like |
| Pp3c24_20960 | -2.08 | 1.44e-41 | protein DETOXIFICATION 16-like                                      |
| Pp3c8_1940   | -2.08 | 4.02e-55 | protein GLE1                                                        |
| Pp3c20_2980  | -2.08 | 9.54e-47 | protein NLP1                                                        |
| Pp3c4_8330   | -2.08 | 5.06e-57 | receptor kinase-like protein                                        |



|              |       |          |                                                                                 |
|--------------|-------|----------|---------------------------------------------------------------------------------|
| Pp3c10_13720 | -2.08 | 9.67e-04 | ureide permease 1-like                                                          |
| Pp3c26_12570 | -2.08 | 4.42e-68 | hypothetical protein PHYPA_011344                                               |
| Pp3c18_8240  | -2.08 | 1.23e-57 | hypothetical protein PHYPA_025065                                               |
| Pp3c13_14980 | -2.08 | 3.95e-44 | ---NA---                                                                        |
| Pp3c1_30428  | -2.07 | 3.66e-16 | ATP-dependent RNA helicase DBP2-like                                            |
| Pp3c17_3830  | -2.07 | 2.29e-49 | transcription factor TCP15-like                                                 |
| Pp3c12_8680  | -2.07 | 2.94e-13 | transmembrane protein 120 homolog                                               |
| Pp3c16_3080  | -2.07 | 5.24e-10 | zinc finger CCCH domain-containing<br>protein 35-like                           |
| Pp3c2_17110  | -2.07 | 1.09e-51 | hypothetical protein PHYPA_016472                                               |
| Pp3c1_14760  | -2.07 | 4.18e-23 | hypothetical protein PHYPA_017974                                               |
| Pp3c27_440   | -2.06 | 8.19e-13 | deoxyhypusine synthase isoform X1                                               |
| Pp3c15_10950 | -2.06 | 3.96e-21 | mitogen-activated protein kinase kinase<br>kinase YODA-like                     |
| Pp3c13_1510  | -2.06 | 4.84e-06 | Retrovirus-related Pol polyprotein from<br>transposon TNT 1-94                  |
| Pp3c16_2080  | -2.06 | 9.73e-55 | Retrovirus-related Pol polyprotein from<br>transposon TNT 1-94                  |
| Pp3c7_6700   | -2.06 | 4.42e-05 | transcription factor GAMYB-like                                                 |
| Pp3c15_12810 | -2.06 | 2.71e-47 | tubulin alpha-3 chain-like                                                      |
| Pp3c2_29140  | -2.06 | 3.53e-23 | ubiquitin-conjugating enzyme E2 2                                               |
| Pp3c11_15790 | -2.06 | 9.85e-49 | V-type proton ATPase subunit a3-like<br>isoform X1                              |
| Pp3c12_4540  | -2.06 | 2.47e-58 | hypothetical protein PHYPA_019585                                               |
| Pp3c9_5650   | -2.05 | 1.08e-06 | 60S ribosomal protein L37-3                                                     |
| Pp3c1_19190  | -2.05 | 7.97e-64 | ammonium transporter 1 member 3-like                                            |
| Pp3c24_10800 | -2.05 | 1.46e-28 | Embryogenesis-associated protein EMB8                                           |
| Pp3c16_23250 | -2.05 | 1.27e-28 | GATA zinc finger protein                                                        |
| Pp3c7_14840  | -2.05 | 5.01e-21 | putative dihydroflavonol-4-reductase                                            |
| Pp3c5_2700   | -2.05 | 4.62e-37 | putative nuclease HARBI1                                                        |
| Pp3c7_20320  | -2.05 | 5.89e-43 | transcription elongation factor B<br>polypeptide 3                              |
| Pp3c23_22230 | -2.05 | 2.48e-39 | hypothetical protein PHYPA_014494                                               |
| Pp3c23_6070  | -2.05 | 1.52e-57 | hypothetical protein PHYPA_015644                                               |
| Pp3c24_5330  | -2.05 | 4.81e-07 | hypothetical protein PHYPA_018827                                               |
| Pp3c1_18350  | -2.05 | 1.10e-17 | ATP-dependent DNA helicase SRS2-like<br>protein At4g25120                       |
| Pp3c24_19080 | -2.04 | 7.67e-29 | calcium sensing receptor, chloroplastic-like                                    |
| Pp3c7_23810  | -2.04 | 1.18e-61 | calmodulin-binding ion transporter-like<br>protein                              |
| Pp3c1_13800  | -2.04 | 2.10e-07 | G-type lectin S-receptor-like<br>serine/threonine-protein kinase SD2-5          |
| Pp3c24_17170 | -2.04 | 1.36e-34 | nuclear pore complex protein NUP54                                              |
| Pp3c3_34180  | -2.04 | 9.15e-52 | protein CONSERVED IN THE GREEN<br>LINEAGE AND DIATOMS 27,<br>chloroplastic-like |
| Pp3c24_12180 | -2.04 | 1.34e-50 | hypothetical protein PHYPA_014424                                               |
| Pp3c2_12860  | -2.04 | 4.31e-08 | hypothetical protein PHYPA_016259                                               |

|              |       |          |                                                                                               |
|--------------|-------|----------|-----------------------------------------------------------------------------------------------|
| Pp3c6_28830  | -2.03 | 1.53e-75 | dihydroceramide fatty acyl 2-hydroxylase<br>FAH1-like                                         |
| Pp3c9_9200   | -2.03 | 1.75e-40 | electron transfer flavoprotein-ubiquinone<br>oxidoreductase, mitochondrial-like isoform<br>X1 |
| Pp3c9_20020  | -2.03 | 1.62e-25 | microtubule-associated protein 70-1-like                                                      |
| Pp3c21_11130 | -2.03 | 2.79e-42 | phospholipase D alpha 1                                                                       |
| Pp3c9_15440  | -2.03 | 7.52e-47 | polyphenol oxidase, chloroplastic-like                                                        |
| Pp3c1_4350   | -2.03 | 8.01e-35 | hypothetical protein PHYPA_001949, partial                                                    |
| Pp3c4_20310  | -2.03 | 1.57e-09 | hypothetical protein PHYPA_025225                                                             |
| Pp3c10_22780 | -2.03 | 3.72e-35 | ---NA---                                                                                      |
| Pp3c1_3040   | -2.02 | 3.08e-17 | ACT domain-containing protein ACR3-like<br>isoform X4                                         |
| Pp3c6_10350  | -2.02 | 3.53e-12 | chlorophyllide a oxygenase, chloroplastic                                                     |
| Pp3c26_11090 | -2.02 | 3.32e-40 | cytosolic purine 5'-nucleotidase-like isoform<br>X1                                           |
| Pp3c11_4100  | -2.02 | 2.47e-29 | ENHANCER OF AG-4 protein 2                                                                    |
| Pp3c24_19680 | -2.02 | 5.21e-13 | J domain-containing protein spf31                                                             |
| Pp3c18_7850  | -2.02 | 2.26e-42 | myosin heavy chain kinase A-like isoform<br>X3                                                |
| Pp3c25_4520  | -2.02 | 9.12e-21 | protein MANNAN SYNTHESIS-RELATED<br>1-like isoform X2                                         |
| Pp3c13_24600 | -2.02 | 2.91e-31 | stress-response A/B barrel domain-<br>containing protein UP3-like                             |
| Pp3c12_25900 | -2.02 | 6.36e-37 | hypothetical protein PHYPA_010127                                                             |
| Pp3c13_16600 | -2.02 | 9.42e-07 | hypothetical protein PHYPA_020126                                                             |
| Pp3c12_21540 | -2.02 | 1.22e-55 | uncharacterized protein LOC112284578                                                          |
| Pp3c14_25660 | -2.02 | 1.31e-13 | uncharacterized protein LOC112290419                                                          |
| Pp3c4_22100  | -2.01 | 1.06e-51 | calcineurin B-like protein 3                                                                  |
| Pp3c8_17920  | -2.01 | 5.43e-28 | DNA-directed RNA polymerase II subunit 4                                                      |
| Pp3c4_8159   | -2.01 | 3.18e-53 | leucine-rich repeat receptor-like<br>serine/threonine/tyrosine-protein kinase<br>SOBIR1       |
| Pp3c15_16860 | -2.01 | 8.11e-06 | oxygen-evolving enhancer protein 2,<br>chloroplastic-like                                     |
| Pp3c25_7030  | -2.01 | 1.56e-36 | probable magnesium transporter NIPA8                                                          |
| Pp3c2_4740   | -2.01 | 1.10e-56 | protein S-acyltransferase 21                                                                  |
| Pp3c5_3190   | -2.01 | 9.03e-08 | Thioredoxin superfamily protein isoform 1                                                     |
| Pp3c3_26700  | -2.01 | 7.65e-14 | vicilin-like seed storage protein At2g18540<br>isoform X2                                     |
| Pp3c15_11070 | -2.01 | 2.57e-45 | hypothetical protein PHYPA_002883                                                             |
| Pp3c6_10610  | -2.01 | 1.04e-31 | hypothetical protein PHYPA_007844                                                             |
| Pp3c2_13420  | -2.01 | 1.63e-24 | hypothetical protein PHYPA_016289                                                             |
| Pp3c6_27020  | -2.01 | 1.31e-04 | hypothetical protein PHYPA_021549                                                             |
| Pp3c19_4880  | -2.01 | 1.56e-27 | hypothetical protein PHYPA_024468                                                             |
| Pp3c6_21060  | -2.00 | 7.07e-48 | diphthamide biosynthesis protein 3-like                                                       |
| Pp3c17_23380 | -2.00 | 1.63e-37 | mitochondrial inner membrane protease<br>subunit 2-like isoform X1                            |

|              |       |           |                                                                                           |
|--------------|-------|-----------|-------------------------------------------------------------------------------------------|
| Pp3c3_1020   | -2.00 | 3.03e-30  | putative DD1A protein                                                                     |
| Pp3c12_6700  | -2.00 | 3.54e-47  | serine/threonine-protein kinase 16-like                                                   |
| Pp3c16_5790  | -2.00 | 3.28e-39  | squalene monooxygenase-like                                                               |
| Pp3c11_800   | -2.00 | 2.17e-30  | hypothetical protein PHYPA_010493                                                         |
| Pp3c16_16040 | -2.00 | 2.59e-70  | hypothetical protein PHYPA_024003                                                         |
| Pp3c15_14300 | -6.04 | 1.21e-134 | scarecrow-like protein 28                                                                 |
| Pp3c11_6580  | -4.58 | 9.26e-139 | hypothetical protein PHYPA_009755                                                         |
| Pp3c8_21760  | -4.54 | 5.89e-39  | 6-phosphogluconate dehydrogenase,<br>decarboxylating 3                                    |
| Pp3c10_11330 | -4.14 | 9.52e-76  | phenylalanine ammonia-lyase-like                                                          |
| Pp3c5_9700   | -4.02 | 9.11e-29  | probable pectate lyase 5                                                                  |
| Pp3c18_14350 | -3.91 | 1.52e-63  | hypothetical protein PHYPA_005345                                                         |
| Pp3c16_19790 | -3.81 | 5.63e-18  | metal tolerance protein C2                                                                |
| Pp3c17_5760  | -3.68 | 5.79e-47  | glycerophosphodiester phosphodiesterase<br>GDPD1, chloroplastic                           |
| Pp3s350_10   | -3.52 | 9.98e-12  | high chlorophyll fluorescence phenotype<br>173                                            |
| Pp3c13_15640 | -3.41 | 8.28e-21  | endoplasmic reticulum oxidoreductin-1                                                     |
| Pp3c6_10090  | -3.40 | 1.25e-83  | probable glycosyltransferase At5g03795                                                    |
| Pp3c15_22920 | -3.39 | 6.59e-60  | DNA polymerase delta catalytic subunit-<br>like isoform X5                                |
| Pp3c13_13170 | -3.35 | 5.72e-152 | hypothetical protein PHYPA_019951                                                         |
| Pp3c13_16130 | -3.32 | 7.40e-89  | Mitochondrial import inner membrane<br>translocase subunit tim-10 isoform 1               |
| Pp3c13_15980 | -3.32 | 3.57e-91  | hypothetical protein PHYPA_019196                                                         |
| trnG         | -3.28 | 3.32e-17  | PSII L-protein                                                                            |
| Pp3c24_13310 | -3.24 | 6.58e-15  | hypothetical protein PHYPA_018322                                                         |
| Pp3c22_16100 | -3.21 | 1.29e-38  | nuclear speckle RNA-binding protein B-like                                                |
| Pp3c19_3900  | -3.21 | 4.17e-45  | protein NLP1                                                                              |
| Pp3c4_8580   | -3.21 | 6.56e-20  | Sorghum bicolor protein targeted either to<br>mitochondria or chloroplast proteins T50848 |
| Pp3c26_5590  | -3.20 | 2.82e-75  | LEC14B protein                                                                            |
| Pp3c20_17620 | -3.19 | 2.69e-34  | hypothetical protein PHYPA_027962                                                         |
| Pp3c13_15800 | -3.18 | 4.44e-89  | Protein terminal ear1-like                                                                |
| Pp3c10_25150 | -3.18 | 1.12e-12  | Retrovirus-related Pol polyprotein from<br>transposon TNT 1-94                            |
| Pp3c1_17080  | -3.18 | 4.91e-55  | hypothetical protein PHYPA_018188                                                         |
| trnL         | -3.16 | 1.08e-04  | .                                                                                         |
| Pp3c13_16000 | -3.13 | 2.12e-84  | uncharacterized protein LOC112292868                                                      |
| Pp3c10_6880  | -3.11 | 2.58e-52  | protein odr-4 homolog                                                                     |
| Pp3c13_15786 | -3.11 | 4.92e-91  | hypothetical protein PHYPA_020096                                                         |
| Pp3c18_18100 | -3.10 | 1.97e-19  | E3 ubiquitin-protein ligase PRT6-like<br>isoform X2                                       |
| Pp3c8_8000   | -3.06 | 5.41e-28  | uncharacterized protein LOC112286360                                                      |
| Pp3c24_8390  | -3.05 | 2.56e-33  | reverse transcriptase                                                                     |
| Pp3c16_21250 | -3.03 | 1.38e-51  | probable thimet oligopeptidase isoform X1                                                 |
| Pp3c2_19460  | -3.01 | 2.72e-16  | NDR1/HIN1-like protein 6 isoform X1                                                       |
| trnE         | -3.00 | 2.85e-03  | PSII protein                                                                              |

|              |       |           |                                                                       |
|--------------|-------|-----------|-----------------------------------------------------------------------|
| Pp3c23_6560  | -2.99 | 4.77e-11  | proteasome subunit beta type-5                                        |
| Pp3c16_19230 | -2.99 | 6.68e-40  | xyloglucan galactosyltransferase XLT2-like                            |
| Pp3c12_14210 | -2.99 | 1.68e-07  | uncharacterized protein LOC112285213                                  |
| Pp3c13_16030 | -2.96 | 3.70e-14  | ribulose biphosphate carboxylase small chain clone 512-like           |
| Pp3c21_18980 | -2.95 | 6.68e-72  | hypothetical protein PHYPA_031026                                     |
| Pp3c17_21350 | -2.93 | 2.27e-18  | nucleolar and coiled-body phosphoprotein 1-like                       |
| Pp3c3_10731  | -2.93 | 1.34e-12  | thioredoxin peroxidase 1                                              |
| Pp3c10_3130  | -2.90 | 1.60e-32  | UPF0187 protein At3g61320, chloroplastic-like                         |
| Pp3c1_35321  | -2.89 | 1.08e-11  | CLP protease regulatory subunit CLPX1, mitochondrial isoform X2       |
| Pp3c22_7170  | -2.88 | 2.22e-20  | hypothetical protein PHYPA_007440                                     |
| Pp3c13_10520 | -2.87 | 2.63e-17  | transcription factor EGL1-like                                        |
| Pp3c14_9180  | -2.86 | 1.42e-68  | YDG domain-containing protein At5g47150-like                          |
| Pp3c13_15790 | -2.85 | 3.51e-32  | phosphatidylinositol glycan anchor biosynthesis class U protein-like  |
| Pp3c1_13170  | -2.85 | 9.16e-73  | hypothetical protein PHYPA_018919                                     |
| Pp3c20_2280  | -2.83 | 1.90e-32  | filament-like plant protein 4 isoform X1                              |
| Pp3c1_2420   | -2.83 | 3.13e-55  | probable pectate lyase 5                                              |
| Pp3c3_10730  | -2.82 | 7.46e-12  | 4-hydroxy-tetrahydrodipicolinate synthase, chloroplastic              |
| Pp3c6_23040  | -2.82 | 4.29e-53  | BRCT domain-containing protein                                        |
| Pp3c9_5280   | -2.82 | 4.54e-112 | probable apyrase 7                                                    |
| Pp3c19_20760 | -2.82 | 7.45e-18  | probable tyrosine-protein phosphatase DG1060                          |
| trnV         | -2.81 | 4.11e-09  | PSI I-protein                                                         |
| Pp3c4_16840  | -2.80 | 9.96e-41  | putative 4-hydroxy-4-methyl-2-oxoglutarate aldolase 3                 |
| Pp3c13_21590 | -2.80 | 8.95e-53  | hypothetical protein PHYPA_019302                                     |
| Pp3c4_17610  | -2.79 | 5.29e-34  | glutamate synthase 1 [NADH], chloroplastic isoform X1                 |
| Pp3c1_42230  | -2.79 | 5.62e-15  | pyrophosphate--fructose 6-phosphate 1-phosphotransferase subunit beta |
| Pp3c16_22640 | -2.77 | 2.44e-14  | probable membrane metalloprotease ARASP2, chloroplastic               |
| Pp3c1_42420  | -2.77 | 1.73e-14  | hypothetical protein PHYPA_001911, partial                            |
| Pp3c12_24970 | -2.76 | 5.42e-87  | nuclear transcription factor Y subunit A-7 isoform X1                 |
| Pp3c4_1550   | -2.75 | 2.86e-29  | zinc finger CCCH domain-containing protein 64                         |
| Pp3c11_4850  | -2.74 | 1.32e-91  | GDP-fucose protein O-fucosyltransferase                               |
| Pp3c26_9830  | -2.73 | 1.59e-07  | bifunctional riboflavin kinase/FMN phosphatase                        |
| Pp3c26_15000 | -2.73 | 4.40e-23  | E3 ubiquitin-protein ligase HERC2-like isoform X1                     |

|              |       |          |                                                                              |
|--------------|-------|----------|------------------------------------------------------------------------------|
| Pp3c3_11210  | -2.73 | 1.02e-29 | probable xyloglucan<br>endotransglucosylase/hydrolase protein 5              |
| Pp3c13_23730 | -2.72 | 9.69e-21 | chromodomain-helicase-DNA-binding<br>protein 9-like isoform X1               |
| Pp3c4_1450   | -2.71 | 1.98e-20 | ethylene-responsive transcription factor<br>ERF043-like                      |
| Pp3c15_2630  | -2.71 | 1.12e-14 | maturase-related protein (mitochondrion)                                     |
| Pp3c20_21990 | -2.71 | 2.06e-09 | hypothetical protein PHYPA_022593                                            |
| Pp3c4_510    | -2.70 | 6.73e-27 | NAD(P)H-quinone oxidoreductase subunit<br>N, chloroplastic                   |
| Pp3c1_33180  | -2.70 | 8.10e-12 | protein JINGUBANG-like                                                       |
| Pp3c7_14650  | -2.70 | 2.49e-14 | hypothetical protein PHYPA_021858                                            |
| Pp3c21_9970  | -2.69 | 4.92e-93 | long chain base biosynthesis protein 2a                                      |
| Pp3c6_21520  | -2.69 | 9.50e-45 | hypothetical protein PHYPA_021944                                            |
| Pp3c8_19540  | -2.68 | 3.22e-65 | B3 domain-containing protein<br>Os11g0197600-like                            |
| Pp3c3_32420  | -2.67 | 9.05e-37 | hypothetical protein PHYPA_023159                                            |
| Pp3c3_15560  | -2.67 | 1.76e-24 | uncharacterized protein LOC112284081                                         |
| Pp3c17_1110  | -2.66 | 1.38e-69 | BUD13 homolog                                                                |
| Pp3c1_30790  | -2.66 | 2.53e-29 | hypothetical protein PHYPA_000579                                            |
| Pp3c7_18910  | -2.65 | 8.53e-06 | abnormal spindle-like microcephaly-<br>associated protein homolog isoform X1 |
| Pp3c7_14450  | -2.65 | 3.37e-66 | retrotransposon protein, putative, Ty1-copia<br>subclass                     |
| trnY         | -2.65 | 3.75e-10 | ribulose-1,5-bisphosphate<br>carboxylase/oxygenase large subunit             |
| Pp3c20_23430 | -2.64 | 2.79e-63 | triacylglycerol lipase 2-like                                                |
| Pp3c19_5170  | -2.63 | 1.87e-31 | uncharacterized protein LOC112273267<br>isoform X1                           |
| Pp3c1_3940   | -2.62 | 1.69e-16 | predicted protein                                                            |
| Pp3c16_2280  | -2.62 | 2.50e-14 | hypothetical protein PHYPA_024324                                            |
| Pp3c19_10230 | -2.62 | 3.16e-45 | uncharacterized protein LOC112273105                                         |
| Pp3c11_9120  | -2.61 | 5.03e-58 | copalyl diphosphate synthase 1-like isoform<br>X1                            |
| Pp3c23_1130  | -2.61 | 9.64e-42 | Retrovirus-related Pol polyprotein from<br>transposon TNT 1-94               |
| Pp3c10_16560 | -2.61 | 6.18e-75 | hypothetical protein PHYPA_030281                                            |
| matK         | -2.60 | 1.12e-30 | ribosomal protein L22                                                        |
| Pp3c2_13970  | -2.58 | 1.37e-30 | U11/U12 small nuclear ribonucleoprotein 35<br>kDa protein                    |
| Pp3c11_4920  | -2.57 | 3.58e-24 | probable methyltransferase PMT21                                             |
| Pp3c25_9350  | -2.54 | 5.15e-53 | hypothetical protein PHYPA_011202                                            |
| Pp3c19_10340 | -2.54 | 1.02e-33 | hypothetical protein PHYPA_024550                                            |
| Pp3c20_2620  | -2.54 | 8.90e-42 | uncharacterized protein LOC112275494                                         |
| Pp3c19_14070 | -2.53 | 2.14e-68 | RING/FYVE/PHD zinc finger superfamily<br>protein                             |
| Pp3c16_20090 | -2.53 | 1.75e-20 | hypothetical protein PHYPA_024218                                            |
| Pp3c4_14700  | -2.52 | 5.86e-45 | protein TIFY 6a-like                                                         |

|              |       |           |                                                                           |
|--------------|-------|-----------|---------------------------------------------------------------------------|
| Pp3c9_5310   | -2.52 | 8.46e-101 | hypothetical protein PHYPA_025947, partial                                |
| Pp3c1_29500  | -2.51 | 1.77e-28  | LRR receptor-like serine/threonine-protein kinase FLS2                    |
| Pp3c3_2620   | -2.51 | 1.95e-67  | ubiquitin-like-specific protease 1D                                       |
| trnK         | -2.50 | 4.85e-32  | ribosomal protein L21                                                     |
| Pp3c20_1150  | -2.49 | 1.65e-15  | predicted protein                                                         |
| Pp3c19_20080 | -2.49 | 2.31e-128 | uncharacterized protein LOC112273157                                      |
| Pp3c5_28500  | -2.48 | 1.12e-62  | catalase isozyme 2-like                                                   |
| Pp3c15_19080 | -2.48 | 6.27e-29  | cationic amino acid transporter 2, vacuolar-like                          |
| Pp3c16_19430 | -2.48 | 5.97e-20  | hypothetical protein PHYPA_024188                                         |
| Pp3c9_4760   | -2.48 | 5.34e-40  | hypothetical protein PHYPA_025921                                         |
| Pp3c5_640    | -2.48 | 6.54e-35  | hypothetical protein PHYPA_027224                                         |
| Pp3c11_6250  | -2.47 | 9.78e-33  | glycosyltransferase-like protein                                          |
| Pp3c20_20120 | -2.47 | 5.58e-17  | myosin-2 heavy chain-like                                                 |
| Pp3c7_21370  | -2.47 | 6.47e-12  | paired amphipathic helix protein Sin3-like 4 isoform X1                   |
| atpB         | -2.47 | 1.09e-55  | PSI P700 apoprotein A1                                                    |
| Pp3c2_19150  | -2.47 | 6.73e-14  | hypothetical protein PHYPA_016583                                         |
| Pp3c15_22730 | -2.46 | 1.72e-61  | GDSL esterase/lipase At4g16230-like                                       |
| Pp3c4_11854  | -2.46 | 2.70e-56  | HMG1/2-like protein                                                       |
| Pp3c5_3210   | -2.46 | 2.33e-66  | probable non-specific lipid-transfer protein AKCS9                        |
| Pp3c2_4100   | -2.46 | 3.93e-13  | putative receptor protein kinase CRINKLY4                                 |
| Pp3c25_1840  | -2.46 | 3.74e-52  | hypothetical protein PHYPA_011444                                         |
| Pp3c4_23200  | -2.45 | 3.96e-08  | predicted protein                                                         |
| Pp3c9_5060   | -2.45 | 1.22e-77  | probable xyloglucan                                                       |
|              |       |           | endotransglucosylase/hydrolase protein 27                                 |
| Pp3c15_22720 | -2.45 | 3.95e-64  | hypothetical protein PHYPA_003359                                         |
| Pp3c8_14190  | -2.44 | 5.77e-44  | diphthine methyltransferase homolog                                       |
| Pp3c12_22390 | -2.44 | 1.82e-45  | probable protein phosphatase 2C 51 isoform X1                             |
| Pp3c27_5030  | -2.44 | 3.07e-95  | protein fluG-like                                                         |
| Pp3c19_12910 | -2.44 | 1.60e-53  | transmembrane protein 53                                                  |
| Pp3c3_16280  | -2.44 | 1.96e-28  | V-type proton ATPase subunit D-like                                       |
| Pp3c3_36450  | -2.43 | 1.66e-20  | hypothetical protein PHYPA_023346                                         |
| Pp3c3_25110  | -2.43 | 3.34e-63  | hypothetical protein PHYPA_029660                                         |
| Pp3c1_42250  | -2.42 | 4.33e-10  | 60S ribosomal protein L7-2                                                |
| Pp3c16_5630  | -2.42 | 4.61e-12  | AC091247_1putative polyprotein, 5'-                                       |
| Pp3c4_13150  | -2.41 | 3.30e-22  | cytochrome c oxidase assembly protein COX11, mitochondrial                |
| Pp3s775_10   | -2.41 | 3.55e-04  | hypothetical protein PHYPA_021160                                         |
| Pp3c19_14710 | -2.41 | 6.52e-38  | hypothetical protein PHYPA_025308                                         |
| Pp3c4_30220  | -2.40 | 3.46e-30  | bifunctional aspartokinase/homoserine dehydrogenase 1, chloroplastic-like |
| Pp3c2_17510  | -2.40 | 1.05e-23  | Proline-rich protein 1                                                    |
| Pp3c10_17170 | -2.40 | 4.49e-11  | WEB family protein At1g12150-like                                         |
| Pp3c4_13140  | -2.40 | 3.60e-22  | hypothetical protein PHYPA_020859                                         |

|              |       |           |                                                                        |
|--------------|-------|-----------|------------------------------------------------------------------------|
| Pp3c19_11600 | -2.40 | 1.87e-71  | hypothetical protein PHYPA_025188                                      |
| Pp3c2_9980   | -2.39 | 5.43e-29  | glycerol-3-phosphate 2-O-acyltransferase 6-like                        |
| Pp3c13_4170  | -2.39 | 1.87e-15  | Retrovirus-related Pol polyprotein from transposon TNT 1-94            |
| Pp3c12_4580  | -2.39 | 3.26e-25  | hypothetical protein PHYPA_019588                                      |
| Pp3c12_7010  | -2.39 | 3.61e-21  | hypothetical protein PHYPA_019679, partial                             |
| Pp3c1_22450  | -2.39 | 2.01e-81  | ---NA---                                                               |
| atpE         | -2.38 | 3.71e-59  | PSI P700 apoprotein A2                                                 |
| Pp3c19_3732  | -2.38 | 3.56e-07  | serine/threonine-protein phosphatase 4 regulatory subunit 2 isoform X2 |
| Pp3c20_18320 | -2.38 | 7.05e-28  | hypothetical protein PHYPA_028003, partial                             |
| Pp3c3_24631  | -2.37 | 4.78e-08  | F-box protein At2g26850-like                                           |
| Pp3c25_6730  | -2.37 | 1.02e-69  | pumilio homolog 1-like                                                 |
| Pp3c7_27000  | -2.37 | 2.28e-61  | Putative non-structural 4                                              |
| Pp3c13_23660 | -2.37 | 1.58e-16  | hypothetical protein PHYPA_019393                                      |
| Pp3c6_16970  | -2.36 | 3.44e-29  | ras-related protein RABH1e                                             |
| Pp3c23_1972  | -2.36 | 2.57e-13  | SUN domain-containing protein 1                                        |
| Pp3c4_8470   | -2.36 | 7.29e-77  | transcription factor bHLH49-like                                       |
| Pp3c3_24618  | -2.35 | 3.19e-12  | golgin subfamily A member 4-like isoform X1                            |
| Pp3c15_21090 | -2.35 | 2.20e-06  | probable 1-deoxy-D-xylulose-5-phosphate synthase, chloroplastic        |
| Pp3c3_25080  | -2.35 | 4.13e-38  | sialidase-like isoform X2                                              |
| Pp3c16_11740 | -2.35 | 5.83e-119 | Transmembrane protein                                                  |
| Pp3c22_6380  | -2.34 | 6.93e-83  | ethylene-responsive transcription factor                               |
| Pp3c22_17930 | -2.34 | 2.91e-36  | Retrovirus-related Pol polyprotein from transposon TNT 1-94            |
| Pp3c1_31440  | -2.34 | 1.82e-65  | Ribosomal protein L23/L15e family protein, putative                    |
| Pp3c24_20800 | -2.34 | 1.89e-37  | subtilisin-like protease SBT2.5                                        |
| Pp3c21_4230  | -2.33 | 1.68e-52  | kinesin-like protein KIN-12E                                           |
| Pp3c20_13600 | -2.33 | 3.48e-18  | putative lipoate-protein ligase A                                      |
| Pp3c12_9500  | -2.32 | 2.64e-67  | ubiquitin carboxyl-terminal hydrolase 12                               |
| Pp3c4_3720   | -2.31 | 1.38e-64  | probable amino-acid acetyltransferase NAGS1, chloroplastic             |
| Pp3c13_6570  | -2.31 | 2.65e-59  | protease Do-like 9                                                     |
| Pp3c4_22170  | -2.31 | 1.39e-12  | reverse transcriptase                                                  |
| Pp3c22_14530 | -2.31 | 1.48e-80  | TMV resistance protein N-like                                          |
| Pp3c16_4550  | -2.31 | 7.45e-63  | hypothetical protein PHYPA_023635                                      |
| Pp3c15_14090 | -2.30 | 3.26e-10  | importin subunit alpha-1-like isoform X1                               |
| Pp3c3_38220  | -2.30 | 3.90e-12  | protein SUPPRESSOR OF npr1-1, CONSTITUTIVE 1-like                      |
| Pp3c9_19520  | -2.30 | 1.78e-57  | hypothetical protein PHYPA_026402                                      |
| Pp3c4_20230  | -2.29 | 3.17e-67  | disease resistance protein TAO1-like                                   |
| Pp3c16_21270 | -2.29 | 1.53e-14  | fasciclin-like protein                                                 |
| Pp3c18_14800 | -2.29 | 1.30e-27  | peroxidase A2-like                                                     |
| Pp3c3_37470  | -2.29 | 2.31e-41  | protein PHR1-LIKE 2-like isoform X1                                    |

|              |       |           |                                                                 |
|--------------|-------|-----------|-----------------------------------------------------------------|
| Pp3c19_20070 | -2.29 | 8.81e-78  | sulphydryl oxidase 2-like isoform X1                            |
| Pp3c6_3820   | -2.29 | 6.75e-07  | transcription factor MYB3R-5-like isoform X3                    |
| Pp3c14_20830 | -2.28 | 8.11e-73  | mediator of RNA polymerase II transcription subunit 31-like     |
| Pp3c23_6900  | -2.28 | 2.12e-13  | protein DOG1-like 3                                             |
| Pp3c23_2010  | -2.28 | 3.63e-24  | UPF0643 protein PB2B2.08-like                                   |
| Pp3c12_11700 | -2.28 | 7.54e-58  | hypothetical protein PHYPA_022665                               |
| Pp3c23_14000 | -2.27 | 9.13e-08  | biotin synthase                                                 |
| Pp3c3_31900  | -2.27 | 2.69e-21  | histone H3.3 isoform X1                                         |
| Pp3c5_12950  | -2.27 | 2.27e-13  | probable pectinesterase 53                                      |
| Pp3c25_400   | -2.27 | 2.98e-40  | protein TSS                                                     |
| Pp3c1_8210   | -2.27 | 3.49e-23  | UPF0051 protein in atpA 3' region-like                          |
| Pp3c19_17080 | -2.26 | 8.24e-28  | Alpha-D-phosphohexomutase superfamily                           |
| Pp3c3_29550  | -2.26 | 6.85e-31  | DNA repair endonuclease UVH1 isoform X1                         |
| Pp3c11_10950 | -2.26 | 2.29e-45  | myb family transcription factor PHL7-like                       |
| Pp3c15_12410 | -2.26 | 1.24e-73  | ras-related protein RABC1-like                                  |
| Pp3c3_24600  | -2.26 | 4.31e-13  | transmembrane emp24 domain-containing protein p24beta2-like     |
| Pp3c5_2110   | -2.26 | 1.50e-16  | hypothetical protein PHYPA_013425                               |
| Pp3c16_4520  | -2.26 | 4.74e-57  | hypothetical protein PHYPA_023633                               |
| Pp3c16_8630  | -2.26 | 9.32e-24  | hypothetical protein PHYPA_023856                               |
| Pp3c13_18780 | -2.25 | 2.31e-24  | AT-rich interactive domain-containing protein 3-like isoform X1 |
| Pp3c25_1450  | -2.25 | 9.26e-48  | conserved oligomeric Golgi complex subunit 3                    |
| Pp3c16_3320  | -2.25 | 1.18e-11  | cytochrome c                                                    |
| Pp3c6_6460   | -2.25 | 1.03e-32  | iron-sulfur cluster assembly protein 1-like                     |
| Pp3c16_3930  | -2.25 | 4.91e-48  | serine/threonine-protein kinase BSK1-like isoform X1            |
| Pp3c24_12360 | -2.25 | 3.71e-62  | hypothetical protein PHYPA_014819, partial                      |
| Pp3c3_35020  | -2.24 | 5.79e-28  | C2 domain-containing protein At1g53590-like                     |
| Pp3c5_14300  | -2.24 | 1.36e-47  | HECT-domain-containing protein                                  |
| Pp3c16_10550 | -2.24 | 2.37e-56  | plastid division protein PDV2-like                              |
| Pp3c19_4310  | -2.24 | 2.93e-25  | predicted protein                                               |
| Pp3c5_8580   | -2.24 | 3.44e-16  | probable sucrose-phosphatase 2 isoform X1                       |
| Pp3c4_3730   | -2.24 | 1.71e-30  | hypothetical protein PHYPA_013738                               |
| Pp3c1_18860  | -2.24 | 7.14e-46  | hypothetical protein PHYPA_031299                               |
| Pp3c11_10480 | -2.24 | 2.27e-61  | uncharacterized protein LOC112280916                            |
| Pp3c19_3840  | -2.23 | 1.33e-100 | AUGMIN subunit3                                                 |
| Pp3c23_2890  | -2.23 | 2.44e-12  | lysophospholipid acyltransferase LPEAT1 isoform X1              |
| Pp3c2_24270  | -2.23 | 2.17e-57  | plant intracellular Ras-group-related LRR protein 1-like        |
| Pp3c12_5820  | -2.23 | 9.37e-10  | hypothetical protein PHYPA_019644                               |
| Pp3c20_22420 | -2.23 | 5.20e-69  | uncharacterized protein LOC112275598                            |



|              |       |          |                                                                                  |
|--------------|-------|----------|----------------------------------------------------------------------------------|
| Pp3c11_15160 | -2.22 | 3.19e-24 | 26S proteasome non-ATPase regulatory subunit 11 homolog                          |
| Pp3c2_28940  | -2.22 | 2.04e-19 | 60S ribosomal protein L21-1                                                      |
| Pp3c16_8870  | -2.22 | 7.86e-08 | probable 26S proteasome subunit YTA6 isoform X1                                  |
| Pp3c3_6760   | -2.22 | 1.48e-12 | RHOMBOID-like protein 13                                                         |
| Pp3c20_13120 | -2.22 | 1.36e-53 | hypothetical protein AXX17_ATUG04770                                             |
| Pp3s116_10   | -2.22 | 6.07e-68 | hypothetical protein PHYPA_000255                                                |
| Pp3c25_1440  | -2.22 | 5.90e-63 | hypothetical protein PHYPA_018282                                                |
| Pp3c20_4990  | -2.22 | 5.06e-59 | hypothetical protein PHYPA_028382, partial                                       |
| Pp3c6_11210  | -2.22 | 1.27e-40 | uncharacterized protein LOC112275223                                             |
| Pp3c9_19800  | -2.21 | 3.62e-38 | dnaJ protein homolog                                                             |
| Pp3c9_20000  | -2.21 | 4.60e-21 | microtubule-associated protein 70-1-like                                         |
| Pp3c11_10680 | -2.21 | 6.00e-69 | probable 3-hydroxyisobutyrate dehydrogenase-like 1, mitochondrial                |
| Pp3c3_3230   | -2.21 | 3.34e-07 | ribosome biogenesis protein BOP1 homolog                                         |
| Pp3c20_4670  | -2.21 | 3.99e-34 | Serine/threonine protein phosphatase 2A 55 kDa regulatory subunit B beta isoform |
| Pp3c18_9930  | -2.20 | 7.63e-12 | 12-oxophytodienoate reductase 3                                                  |
| Pp3c19_5900  | -2.20 | 4.31e-10 | beta-amylase 2, chloroplastic-like                                               |
| Pp3c24_12430 | -2.20 | 7.53e-21 | biotin carboxyl carrier protein of acetyl-CoA carboxylase                        |
| Pp3s242_10   | -2.20 | 5.18e-56 | mitochondrial dicarboxylate/tricarboxylate transporter DTC                       |
| Pp3c3_1650   | -2.20 | 1.17e-08 | TMV resistance protein N-like                                                    |
| Pp3c21_9980  | -2.20 | 6.01e-98 | hypothetical protein PHYPA_007864                                                |
| Pp3c2_24160  | -2.20 | 7.76e-60 | uncharacterized protein LOC112289304                                             |
| Pp3c14_3220  | -2.19 | 2.81e-04 | elongation factor 1-alpha-like                                                   |
| Pp3c5_10730  | -2.19 | 7.90e-53 | GDSL esterase/lipase At5g55050-like                                              |
| Pp3c24_8780  | -2.19 | 3.51e-35 | protein translocase subunit SECA2, chloroplastic isoform X2                      |
| Pp3c11_21460 | -2.19 | 2.26e-14 | UPF0613 protein PB24D3.06c                                                       |
| Pp3c6_20300  | -2.19 | 4.00e-47 | WD40 repeat-like protein                                                         |
| Pp3c11_23670 | -2.18 | 3.74e-52 | chloroplast envelope membrane protein-like                                       |
| Pp3c19_4313  | -2.18 | 2.92e-23 | dynein heavy chain 7, axonemal-like                                              |
| Pp3s116_40   | -2.18 | 7.11e-55 | RGG repeats nuclear RNA binding protein A-like                                   |
| Pp3c11_4830  | -2.18 | 1.20e-14 | vegetative cell wall protein gp1-like                                            |
| Pp3c10_3020  | -2.18 | 5.87e-70 | hypothetical protein PHYPA_005627                                                |
| Pp3c20_8260  | -2.18 | 1.91e-48 | hypothetical protein PHYPA_027651                                                |
| Pp3c22_11130 | -2.17 | 3.07e-12 | Drug/metabolite transporter                                                      |
| Pp3c16_12600 | -2.17 | 1.74e-44 | galactan beta-1,4-galactosyltransferase GALS1-like                               |
| Pp3c13_5930  | -2.17 | 2.39e-56 | heat shock protein 83                                                            |
| Pp3c5_7150   | -2.17 | 5.36e-47 | KAT8 regulatory NSL complex subunit 3                                            |
| Pp3c21_12100 | -2.17 | 1.47e-92 | LRR receptor-like serine/threonine-protein kinase GSO1 isoform X1                |
| Pp3c20_1900  | -2.17 | 5.53e-18 | peroxisomal 2,4-dienoyl-CoA reductase-like                                       |

|              |       |          |                                                                              |
|--------------|-------|----------|------------------------------------------------------------------------------|
| Pp3c3_29530  | -2.17 | 2.78e-28 | probable splicing factor 3A subunit 1                                        |
| Pp3c7_120    | -2.17 | 7.82e-32 | protein ENHANCED DISEASE<br>RESISTANCE 2-like                                |
| trnF         | -2.17 | 1.56e-04 | PSII 47kDa protein                                                           |
| Pp3c19_1490  | -2.17 | 1.28e-30 | universal stress protein PHOS34-like                                         |
| Pp3c14_12070 | -2.17 | 9.16e-60 | hypothetical protein PHYPA_017420                                            |
| Pp3c17_20310 | -2.16 | 7.77e-42 | ethylene-responsive transcription factor<br>ERF084-like                      |
| Pp3c22_2660  | -2.16 | 4.68e-27 | GA20 oxidase-like protein                                                    |
| Pp3c26_1140  | -2.16 | 3.56e-20 | nuclear-pore anchor                                                          |
| Pp3c5_7180   | -2.16 | 1.16e-46 | phenylalanine ammonia-lyase-like                                             |
| Pp3c22_7690  | -2.16 | 6.71e-88 | predicted protein                                                            |
| Pp3c3_34790  | -2.16 | 4.39e-51 | hypothetical protein PHYPA_023263                                            |
| Pp3c5_7110   | -2.16 | 4.27e-47 | uncharacterized protein LOC112274862<br>isoform X2                           |
| Pp3c12_20650 | -2.15 | 2.35e-62 | condensin complex subunit 2-like                                             |
| Pp3c22_10850 | -2.15 | 1.36e-51 | disease resistance-like protein CSA1                                         |
| Pp3c6_26200  | -2.15 | 4.46e-35 | histone H2B.8-like                                                           |
| Pp3c17_14680 | -2.15 | 7.98e-50 | inactive protein kinase<br>SELMODRAFT_444075-like                            |
| Pp3c26_630   | -2.15 | 2.18e-43 | predicted protein                                                            |
| Pp3c1_7380   | -2.15 | 8.56e-88 | probable protein phosphatase 2C 15 isoform<br>X1                             |
| Pp3c6_200    | -2.15 | 2.02e-12 | Retrovirus-related Pol polyprotein from<br>transposon TNT 1-94               |
| Pp3c17_14681 | -2.15 | 6.89e-50 | hypothetical protein PHYPA_004393                                            |
| Pp3c11_2650  | -2.15 | 1.38e-33 | hypothetical protein PHYPA_009679                                            |
| Pp3c24_13190 | -2.14 | 4.89e-15 | 60S ribosomal protein L28-1-like                                             |
| Pp3c11_12080 | -2.14 | 9.75e-70 | eukaryotic translation initiation factor 3<br>subunit C-like                 |
| Pp3c6_6830   | -2.14 | 1.15e-57 | F-box protein At1g47056-like                                                 |
| Pp3c20_15220 | -2.14 | 1.27e-13 | ---NA---                                                                     |
| Pp3c18_13090 | -2.14 | 1.20e-46 | uncharacterized protein LOC112279900                                         |
| Pp3s1006_30  | -2.14 | 2.30e-04 | uncharacterized protein LOC112290578<br>isoform X3                           |
| Pp3c12_15820 | -2.13 | 3.63e-30 | FT-interacting protein 1-like                                                |
| Pp3c1_32200  | -2.13 | 2.40e-50 | germin-like protein 1-3                                                      |
| Pp3c10_15730 | -2.13 | 1.50e-86 | polyadenylate-binding protein-interacting<br>protein 7-like                  |
| Pp3c5_19300  | -2.13 | 2.96e-25 | hypothetical protein PHYPA_013332                                            |
| Pp3c1_27990  | -2.13 | 1.45e-73 | uncharacterized protein LOC112285443<br>isoform X1                           |
| Pp3c25_15260 | -2.12 | 1.67e-50 | CAX-interacting protein 4-like                                               |
| Pp3c16_15270 | -2.12 | 1.57e-79 | DEAD-box ATP-dependent RNA helicase<br>42                                    |
| Pp3c7_23980  | -2.12 | 2.66e-84 | DNA-(apurinic or apyrimidinic site) lyase                                    |
| Pp3c21_6200  | -2.12 | 4.59e-19 | Glycosyl hydrolase, five-bladed beta-<br>propellor domain-containing protein |

|              |       |          |                                                                     |
|--------------|-------|----------|---------------------------------------------------------------------|
| Pp3c13_20640 | -2.12 | 1.79e-30 | Prestalk-specific protein tagB                                      |
| Pp3c10_4440  | -2.12 | 2.56e-27 | probable protein phosphatase 2C 60 isoform X1                       |
| Pp3c18_8820  | -2.12 | 4.66e-61 | Retrovirus-related Pol polyprotein from transposon TNT 1-94         |
| Pp3c15_16700 | -2.12 | 9.37e-46 | ribosomal protein L16 (mitochondrion)                               |
| Pp3c23_1980  | -2.12 | 5.75e-15 | sodium-dependent phosphate transport protein 1, chloroplastic       |
| Pp3c2_4940   | -2.12 | 1.08e-18 | uncharacterized endoplasmic reticulum membrane protein YGL010W-like |
| Pp3c4_28370  | -2.12 | 1.79e-69 | vasohibin-2 isoform X3                                              |
| Pp3c13_15240 | -2.12 | 4.59e-13 | hypothetical protein PHYPA_020063                                   |
| Pp3c3_35180  | -2.11 | 1.21e-70 | lanC-like protein GCL1                                              |
| Pp3c9_19950  | -2.11 | 1.01e-31 | putative clathrin assembly protein At5g35200                        |
| Pp3c4_31680  | -2.11 | 1.02e-06 | RNA helicase nonsense mRNA reducing factor                          |
| Pp3c13_2310  | -2.11 | 7.83e-43 | SAL1 phosphatase-like                                               |
| Pp3c2_22630  | -2.11 | 1.37e-33 | hypothetical protein PHYPA_015741                                   |
| Pp3c1_1330   | -2.11 | 4.93e-64 | hypothetical protein PHYPA_018926                                   |
| Pp3c7_24650  | -2.11 | 9.44e-38 | hypothetical protein PHYPA_029322, partial                          |
| Pp3c20_5760  | -2.11 | 2.29e-51 | ---NA---                                                            |
| Pp3c7_11090  | -2.10 | 5.50e-57 | aspartyl protease family protein 2-like                             |
| Pp3c24_18690 | -2.10 | 4.38e-40 | autophagy-related protein 8C                                        |
| Pp3c14_11030 | -2.10 | 6.64e-70 | calnexin homolog                                                    |
| Pp3c8_5370   | -2.10 | 9.00e-33 | F-box only protein 6-like                                           |
| Pp3c4_8171   | -2.10 | 6.22e-64 | hydroxyproline O-arabinosyltransferase 3-like                       |
| Pp3c6_18710  | -2.10 | 1.81e-39 | proteasome subunit alpha type-7                                     |
| Pp3c12_22330 | -2.10 | 8.35e-06 | protein ECERIFERUM 3                                                |
| Pp3c26_6740  | -2.10 | 3.75e-36 | serine carboxypeptidase-like                                        |
| Pp3c12_9890  | -2.10 | 3.14e-49 | serine/threonine-protein kinase HT1-like                            |
| Pp3c7_11100  | -2.10 | 5.63e-56 | trihelix transcription factor ASR3-like                             |
| Pp3c18_13350 | -2.10 | 2.53e-23 | ---NA---                                                            |
| Pp3c10_9740  | -2.09 | 6.07e-68 | casein kinase 1-like protein 1                                      |
| Pp3c7_22220  | -2.09 | 1.12e-07 | pol-like protein                                                    |
| Pp3c1_4010   | -2.09 | 8.23e-53 | U-box domain-containing protein 43-like                             |
| Pp3c27_6070  | -2.09 | 1.27e-17 | hypothetical protein PHYPA_001573, partial                          |
| Pp3c7_12850  | -2.09 | 1.50e-42 | hypothetical protein PHYPA_021789                                   |
| Pp3c19_12750 | -2.09 | 4.88e-39 | hypothetical protein PHYPA_025225                                   |
| Pp3c14_7930  | -2.08 | 7.74e-25 | aldehyde oxidase GLOX-like                                          |
| Pp3c17_4440  | -2.08 | 1.21e-10 | arginyl-tRNA--protein transferase 2-like                            |
| Pp3c12_5220  | -2.08 | 7.77e-15 | enoyl-[acyl-carrier-protein] reductase [NADH] 1, chloroplastic-like |
| Pp3c24_20960 | -2.08 | 1.44e-41 | protein DETOXIFICATION 16-like                                      |
| Pp3c8_1940   | -2.08 | 4.02e-55 | protein GLE1                                                        |
| Pp3c20_2980  | -2.08 | 9.54e-47 | protein NLP1                                                        |
| Pp3c4_8330   | -2.08 | 5.06e-57 | receptor kinase-like protein                                        |

|              |       |          |                                                                                 |
|--------------|-------|----------|---------------------------------------------------------------------------------|
| Pp3c10_13720 | -2.08 | 9.67e-04 | ureide permease 1-like                                                          |
| Pp3c26_12570 | -2.08 | 4.42e-68 | hypothetical protein PHYPA_011344                                               |
| Pp3c18_8240  | -2.08 | 1.23e-57 | hypothetical protein PHYPA_025065                                               |
| Pp3c13_14980 | -2.08 | 3.95e-44 | ---NA---                                                                        |
| Pp3c1_30428  | -2.07 | 3.66e-16 | ATP-dependent RNA helicase DBP2-like                                            |
| Pp3c17_3830  | -2.07 | 2.29e-49 | transcription factor TCP15-like                                                 |
| Pp3c12_8680  | -2.07 | 2.94e-13 | transmembrane protein 120 homolog                                               |
| Pp3c16_3080  | -2.07 | 5.24e-10 | zinc finger CCCH domain-containing<br>protein 35-like                           |
| Pp3c2_17110  | -2.07 | 1.09e-51 | hypothetical protein PHYPA_016472                                               |
| Pp3c1_14760  | -2.07 | 4.18e-23 | hypothetical protein PHYPA_017974                                               |
| Pp3c27_440   | -2.06 | 8.19e-13 | deoxyhypusine synthase isoform X1                                               |
| Pp3c15_10950 | -2.06 | 3.96e-21 | mitogen-activated protein kinase kinase<br>kinase YODA-like                     |
| Pp3c13_1510  | -2.06 | 4.84e-06 | Retrovirus-related Pol polyprotein from<br>transposon TNT 1-94                  |
| Pp3c16_2080  | -2.06 | 9.73e-55 | Retrovirus-related Pol polyprotein from<br>transposon TNT 1-94                  |
| Pp3c7_6700   | -2.06 | 4.42e-05 | transcription factor GAMYB-like                                                 |
| Pp3c15_12810 | -2.06 | 2.71e-47 | tubulin alpha-3 chain-like                                                      |
| Pp3c2_29140  | -2.06 | 3.53e-23 | ubiquitin-conjugating enzyme E2 2                                               |
| Pp3c11_15790 | -2.06 | 9.85e-49 | V-type proton ATPase subunit a3-like<br>isoform X1                              |
| Pp3c12_4540  | -2.06 | 2.47e-58 | hypothetical protein PHYPA_019585                                               |
| Pp3c9_5650   | -2.05 | 1.08e-06 | 60S ribosomal protein L37-3                                                     |
| Pp3c1_19190  | -2.05 | 7.97e-64 | ammonium transporter 1 member 3-like                                            |
| Pp3c24_10800 | -2.05 | 1.46e-28 | Embryogenesis-associated protein EMB8                                           |
| Pp3c16_23250 | -2.05 | 1.27e-28 | GATA zinc finger protein                                                        |
| Pp3c7_14840  | -2.05 | 5.01e-21 | putative dihydroflavonol-4-reductase                                            |
| Pp3c5_2700   | -2.05 | 4.62e-37 | putative nuclease HARBI1                                                        |
| Pp3c7_20320  | -2.05 | 5.89e-43 | transcription elongation factor B<br>polypeptide 3                              |
| Pp3c23_22230 | -2.05 | 2.48e-39 | hypothetical protein PHYPA_014494                                               |
| Pp3c23_6070  | -2.05 | 1.52e-57 | hypothetical protein PHYPA_015644                                               |
| Pp3c24_5330  | -2.05 | 4.81e-07 | hypothetical protein PHYPA_018827                                               |
| Pp3c1_18350  | -2.05 | 1.10e-17 | ATP-dependent DNA helicase SRS2-like<br>protein At4g25120                       |
| Pp3c24_19080 | -2.04 | 7.67e-29 | calcium sensing receptor, chloroplastic-like                                    |
| Pp3c7_23810  | -2.04 | 1.18e-61 | calmodulin-binding ion transporter-like<br>protein                              |
| Pp3c1_13800  | -2.04 | 2.10e-07 | G-type lectin S-receptor-like<br>serine/threonine-protein kinase SD2-5          |
| Pp3c24_17170 | -2.04 | 1.36e-34 | nuclear pore complex protein NUP54                                              |
| Pp3c3_34180  | -2.04 | 9.15e-52 | protein CONSERVED IN THE GREEN<br>LINEAGE AND DIATOMS 27,<br>chloroplastic-like |
| Pp3c24_12180 | -2.04 | 1.34e-50 | hypothetical protein PHYPA_014424                                               |
| Pp3c2_12860  | -2.04 | 4.31e-08 | hypothetical protein PHYPA_016259                                               |

|              |       |          |                                                                                               |
|--------------|-------|----------|-----------------------------------------------------------------------------------------------|
| Pp3c6_28830  | -2.03 | 1.53e-75 | dihydroceramide fatty acyl 2-hydroxylase<br>FAH1-like                                         |
| Pp3c9_9200   | -2.03 | 1.75e-40 | electron transfer flavoprotein-ubiquinone<br>oxidoreductase, mitochondrial-like isoform<br>X1 |
| Pp3c9_20020  | -2.03 | 1.62e-25 | microtubule-associated protein 70-1-like                                                      |
| Pp3c21_11130 | -2.03 | 2.79e-42 | phospholipase D alpha 1                                                                       |
| Pp3c9_15440  | -2.03 | 7.52e-47 | polyphenol oxidase, chloroplastic-like                                                        |
| Pp3c1_4350   | -2.03 | 8.01e-35 | hypothetical protein PHYPA_001949, partial                                                    |
| Pp3c4_20310  | -2.03 | 1.57e-09 | hypothetical protein PHYPA_025225                                                             |
| Pp3c10_22780 | -2.03 | 3.72e-35 | ---NA---                                                                                      |
| Pp3c1_3040   | -2.02 | 3.08e-17 | ACT domain-containing protein ACR3-like<br>isoform X4                                         |
| Pp3c6_10350  | -2.02 | 3.53e-12 | chlorophyllide a oxygenase, chloroplastic                                                     |
| Pp3c26_11090 | -2.02 | 3.32e-40 | cytosolic purine 5'-nucleotidase-like isoform<br>X1                                           |
| Pp3c11_4100  | -2.02 | 2.47e-29 | ENHANCER OF AG-4 protein 2                                                                    |
| Pp3c24_19680 | -2.02 | 5.21e-13 | J domain-containing protein spf31                                                             |
| Pp3c18_7850  | -2.02 | 2.26e-42 | myosin heavy chain kinase A-like isoform<br>X3                                                |
| Pp3c25_4520  | -2.02 | 9.12e-21 | protein MANNAN SYNTHESIS-RELATED<br>1-like isoform X2                                         |
| Pp3c13_24600 | -2.02 | 2.91e-31 | stress-response A/B barrel domain-<br>containing protein UP3-like                             |
| Pp3c12_25900 | -2.02 | 6.36e-37 | hypothetical protein PHYPA_010127                                                             |
| Pp3c13_16600 | -2.02 | 9.42e-07 | hypothetical protein PHYPA_020126                                                             |
| Pp3c12_21540 | -2.02 | 1.22e-55 | uncharacterized protein LOC112284578                                                          |
| Pp3c14_25660 | -2.02 | 1.31e-13 | uncharacterized protein LOC112290419                                                          |
| Pp3c4_22100  | -2.01 | 1.06e-51 | calcineurin B-like protein 3                                                                  |
| Pp3c8_17920  | -2.01 | 5.43e-28 | DNA-directed RNA polymerase II subunit 4                                                      |
| Pp3c4_8159   | -2.01 | 3.18e-53 | leucine-rich repeat receptor-like<br>serine/threonine/tyrosine-protein kinase<br>SOBIR1       |
| Pp3c15_16860 | -2.01 | 8.11e-06 | oxygen-evolving enhancer protein 2,<br>chloroplastic-like                                     |
| Pp3c25_7030  | -2.01 | 1.56e-36 | probable magnesium transporter NIPA8                                                          |
| Pp3c2_4740   | -2.01 | 1.10e-56 | protein S-acyltransferase 21                                                                  |
| Pp3c5_3190   | -2.01 | 9.03e-08 | Thioredoxin superfamily protein isoform 1                                                     |
| Pp3c3_26700  | -2.01 | 7.65e-14 | vicilin-like seed storage protein At2g18540<br>isoform X2                                     |
| Pp3c15_11070 | -2.01 | 2.57e-45 | hypothetical protein PHYPA_002883                                                             |
| Pp3c6_10610  | -2.01 | 1.04e-31 | hypothetical protein PHYPA_007844                                                             |
| Pp3c2_13420  | -2.01 | 1.63e-24 | hypothetical protein PHYPA_016289                                                             |
| Pp3c6_27020  | -2.01 | 1.31e-04 | hypothetical protein PHYPA_021549                                                             |
| Pp3c19_4880  | -2.01 | 1.56e-27 | hypothetical protein PHYPA_024468                                                             |
| Pp3c6_21060  | -2.00 | 7.07e-48 | diphthamide biosynthesis protein 3-like                                                       |
| Pp3c17_23380 | -2.00 | 1.63e-37 | mitochondrial inner membrane protease<br>subunit 2-like isoform X1                            |

|              |       |           |                                                                             |
|--------------|-------|-----------|-----------------------------------------------------------------------------|
| Pp3c3_1020   | -2.00 | 3.03e-30  | putative DD1A protein                                                       |
| Pp3c12_6700  | -2.00 | 3.54e-47  | serine/threonine-protein kinase 16-like                                     |
| Pp3c16_5790  | -2.00 | 3.28e-39  | squalene monooxygenase-like                                                 |
| Pp3c11_800   | -2.00 | 2.17e-30  | hypothetical protein PHYPA_010493                                           |
| Pp3c16_16040 | -2.00 | 2.59e-70  | hypothetical protein PHYPA_024003                                           |
| Pp3c15_14300 | -6.04 | 1.21e-134 | scarecrow-like protein 28                                                   |
| Pp3c11_6580  | -4.58 | 9.26e-139 | hypothetical protein PHYPA_009755                                           |
| Pp3c8_21760  | -4.54 | 5.89e-39  | 6-phosphogluconate dehydrogenase,<br>decarboxylating 3                      |
| Pp3c10_11330 | -4.14 | 9.52e-76  | phenylalanine ammonia-lyase-like                                            |
| Pp3c5_9700   | -4.02 | 9.11e-29  | probable pectate lyase 5                                                    |
| Pp3c18_14350 | -3.91 | 1.52e-63  | hypothetical protein PHYPA_005345                                           |
| Pp3c16_19790 | -3.81 | 5.63e-18  | metal tolerance protein C2                                                  |
| Pp3c17_5760  | -3.68 | 5.79e-47  | glycerophosphodiester phosphodiesterase<br>GDPD1, chloroplastic             |
| Pp3s350_10   | -3.52 | 9.98e-12  | high chlorophyll fluorescence phenotype<br>173                              |
| Pp3c13_15640 | -3.41 | 8.28e-21  | endoplasmic reticulum oxidoreductin-1                                       |
| Pp3c6_10090  | -3.40 | 1.25e-83  | probable glycosyltransferase At5g03795                                      |
| Pp3c15_22920 | -3.39 | 6.59e-60  | DNA polymerase delta catalytic subunit-<br>like isoform X5                  |
| Pp3c13_13170 | -3.35 | 5.72e-152 | hypothetical protein PHYPA_019951                                           |
| Pp3c13_16130 | -3.32 | 7.40e-89  | Mitochondrial import inner membrane<br>translocase subunit tim-10 isoform 1 |
| Pp3c13_15980 | -3.32 | 3.57e-91  | hypothetical protein PHYPA_019196                                           |
| trnG         | -3.28 | 3.32e-17  | PSII L-protein                                                              |
| Pp3c24_13310 | -3.24 | 6.58e-15  | hypothetical protein PHYPA_018322                                           |

**Supporting Information Table S3:** Data of upregulated and downregulated genes represented in Figure 4.

| Biological process        | Sequence ID  | Gene name  | Description                      | LogFC | FDR       |
|---------------------------|--------------|------------|----------------------------------|-------|-----------|
| Phenyl-propanoids pathway | Pp3c21_7680  | <i>pal</i> | Phenylalanine ammonia-lyase      | 8.40  | 1.50e-23  |
|                           | Pp3c2_32410  | <i>pal</i> | Phenylalanine ammonia-lyase      | 8.19  | 4.58e-41  |
|                           | Pp3c21_7670  | <i>pal</i> | Phenylalanine ammonia-lyase      | 8.18  | 1.18e-20  |
|                           | Pp3c19_13690 | <i>pal</i> | Phenylalanine ammonia-lyase      | 7.04  | 5.45e-35  |
|                           | Pp3c13_9000  | <i>pal</i> | Phenylalanine ammonia-lyase      | 6.73  | 3.00e-226 |
|                           | Pp3c2_30610  | <i>pal</i> | Phenylalanine ammonia-lyase      | 6.67  | 7.51e-157 |
|                           | Pp3c1_18830  | <i>pal</i> | Phenylalanine ammonia-lyase      | 6.37  | 3.04e-185 |
|                           | Pp3c1_18940  | <i>pal</i> | Phenylalanine ammonia-lyase      | 6.33  | 3.22e-176 |
|                           | Pp3c26_2420  | <i>pal</i> | Phenylalanine ammonia-lyase      | 4.83  | 3.04e-91  |
|                           | Pp3c19_2670  | <i>pal</i> | Phenylalanine ammonia-lyase      | 2.18  | 2.96e-05  |
|                           | Pp3c5_7180   | <i>pal</i> | Phenylalanine ammonia-lyase      | -2.16 | 1.16e-46  |
|                           | Pp3c10_11330 | <i>pal</i> | Phenylalanine ammonia-lyase      | -4.14 | 9.52e-76  |
|                           | Pp3c2_27270  | <i>chi</i> | Chalcone-flavonone isomerase     | 2.99  | 1.53e-84  |
|                           | Pp3c16_23390 | <i>cad</i> | Cinnamyl alcohol dehydrogenase   | 2.63  | 1.79e-25  |
|                           | Pp3c19_2720  | <i>cad</i> | Cinnamyl alcohol dehydrogenase 6 | 2.44  | 2.08e-09  |
|                           | Pp3c16_17510 | <i>chs</i> | Chalcone synthase                | 2.43  | 1.23e-26  |
|                           | Pp3c3_27940  | <i>4cl</i> | 4-Coumarate-CoA ligase-5         | 2.00  | 1.29e-16  |
|                           | Pp3c14_24040 | <i>pel</i> | Pectate lyase-like               | 6.66  | 5.89E-79  |

|                                  |              |             |                                                  |      |           |
|----------------------------------|--------------|-------------|--------------------------------------------------|------|-----------|
| Cell wall compounds biosynthesis | Pp3c13_17633 | <i>csla</i> | beta-Mannosyltransferase 1                       | 5.27 | 8.98e-14  |
|                                  | Pp3c4_20210  | <i>tbl</i>  | Protein trichome birefringence                   | 4.89 | 2.9e-13   |
|                                  | Pp3c1_28020  | <i>pme</i>  | Pectinesterase 53                                | 4.46 | 1.26e-32  |
|                                  | Pp3c3_31700  | <i>pagr</i> | Protein pectic arabinogalactan synthesis-related | 4.00 | 3.54e-17  |
|                                  | Pp3c11_9619  | <i>lrx</i>  | Leucine-rich repeat extensin-like protein 5      | 2.69 | 3.55e-22  |
|                                  | Pp3c20_200   | <i>cals</i> | Callose synthase 12                              | 2.38 | 1.15e-27  |
|                                  | Pp3c5_14090  | <i>cals</i> | Callose synthase 9                               | 2.28 | 4.2e-8    |
|                                  | Pp3c27_8130  | <i>csld</i> | Cellulose synthase                               | 2.37 | 1.9e-67   |
|                                  | Pp3c6_6545   | <i>csld</i> | Cellulose synthase                               | 2.11 | 5.57e-34  |
|                                  | Pp3c9_19210  | <i>gals</i> | Galactan beta-1,4-galactosyltransferase          | 2.13 | 6e-25     |
| Defense response                 | Pp3c22_16800 | <i>gp</i>   | Vegetative cell wall protein gp1                 | 2.02 | 3.03e-33  |
|                                  | Pp3c2_36350  | <i>erg</i>  | Elicitor-responsive protein 3                    | 6.56 | 7.85e-61  |
|                                  | Pp3c21_14500 | <i>tpr</i>  | Topless-related protein 1-like                   | 6.07 | 1.93e-203 |
|                                  | Pp3c19_6710  | <i>tao</i>  | Disease resistance protein TAO1                  | 4.15 | 1.24e-61  |
|                                  | Pp3c9_14080  | <i>tao</i>  | Disease resistance protein TAO1                  | 2.83 | 5.17e-26  |
|                                  | Pp3c6_7260   | <i>tao</i>  | Disease resistance protein TAO1                  | 2.11 | 1.32e-45  |
|                                  | Pp3c11_12290 | <i>snc1</i> | Protein suppressor of NPR1-1, constitutive 1     | 3.25 | 5.24e-11  |
|                                  | Pp3c22_20810 | <i>snc1</i> | Protein suppressor of NPR1-1, constitutive 1     | 2.89 | 2.01e-14  |
|                                  | Pp3c23_17280 | <i>snc1</i> | Protein suppressor of NPR1-1, constitutive 1     | 2.22 | 5.63e-6   |



|               |              |                |                                                                     |       |           |
|---------------|--------------|----------------|---------------------------------------------------------------------|-------|-----------|
|               | Pp3c5_13990  | <i>snc1</i>    | Protein suppressor of NPR1-1, constitutive 1                        | 2.19  | 6.26e-70  |
|               | Pp3c10_20210 | <i>nramp</i>   | Nramp-domain-containing protein                                     | 2.64  | 5.73e-47  |
|               | Pp3c13_4250  | <i>tmv_rpn</i> | TMV resistance protein N-like                                       | 2.28  | 2.8e-17   |
|               | Pp3c7_23740  | <i>bbd</i>     | bifunctional nuclease 1-like                                        | 2.21  | 6.06e-26  |
|               | Pp3c1_10860  | <i>tmv-rpn</i> | TMV resistance protein N-like                                       | 2.03  | 4.06e-35  |
|               | Pp3c2_2790   | <i>mlp</i>     | MLP-like protein 423                                                | 2.26  | 1.25e-08  |
|               | Pp3c3_6500   | <i>mlo</i>     | MLO-like protein 5                                                  | 2.16  | 1.19e-67  |
|               | Pp3c12_20050 | <i>mlo</i>     | MLO-like protein 14                                                 | 2.04  | 6.42e-18  |
|               | Pp3c13_9000  | <i>dir</i>     | Putative lipid-transfer protein DIR1                                | 2.05  | 1.41e-5   |
|               | Pp3c7_120    | <i>edr</i>     | Protein Enhanced Disease Resistance 2                               | -2.17 | 7.82e-32  |
| LRR-receptors | Pp3c5_23340  | <i>traf</i>    | TNF receptor-associated factor homolog 1a                           | 6.97  | 7.32e-50  |
|               | Pp3c6_10250  | <i>bak</i>     | LRR receptor kinase BAK1                                            | 3.04  | 2.2e-23   |
|               | Pp3c2_30610  | <i>erl</i>     | LRR receptor-like ser/thr-protein kinase ERL1                       | 2.14  | 1.46e-3   |
|               | Pp3c7_22440  | <i>lrr-pk</i>  | Probable leucine-rich repeat receptor-like protein kinase At1g68400 | 6.22  | 6.62e-61  |
|               | Pp3c21_12100 | <i>gso</i>     | LRR receptor-like ser/thr-protein kinase GSO1                       | -2.17 | 1.47e-92  |
| ROS           | Pp3c17_9830  | <i>sod</i>     | Superoxide dismutase [Cu-Zn]-like                                   | 4.05  | 1.08e-117 |
|               | Pp3c9_2080   | <i>prx</i>     | Peroxidase N1-like                                                  | 3.18  | 1.15e-13  |

|                              |              |             |                                                               |       |          |
|------------------------------|--------------|-------------|---------------------------------------------------------------|-------|----------|
| Photosynthesis / Chloroplast | Pp3c6_26980  | <i>glox</i> | Aldehyde oxidase GLOX-like                                    | 2.65  | 3.07e-09 |
|                              | Pp3c10_13010 | <i>glox</i> | Aldehyde oxidase GLOX-like                                    | 2.36  | 3.09e-08 |
|                              | Pp3c18_14800 | <i>prx</i>  | Peroxidase A2-like                                            | -2.29 | 1.3e-27  |
|                              | Pp3c3_10731  | <i>prx</i>  | Thioredoxin peroxidase 1                                      | -2.93 | 1.34e-12 |
|                              | Pp3c5_28500  | <i>cat</i>  | Catalase isozyme 2                                            | -2.48 | 1.12e-62 |
|                              | Pp3s350_10   | <i>hcf</i>  | High chlorophyll fluorescence phenotype 173                   | -3.52 | 9.98e-12 |
|                              | Pp3c13_16030 | <i>rbc</i>  | Ribulose Bisphosphate Carboxylase small chain clone 512-like  | -2.96 | 3.7e-14  |
|                              | trnY         | <i>rbc</i>  | Ribulose-1,5-Bisphosphate Carboxylase/Oxygenase large subunit | -2.65 | 3.75e-10 |
|                              | trnG         | <i>psb</i>  | Photosystem II L-protein                                      | -3.28 | 3.32e-17 |
|                              | trnE         | <i>psb</i>  | Photosystem II protein                                        | -3.00 | 2.85e-3  |
|                              | trnV         | <i>psa</i>  | Photosystem I-protein                                         | -2.81 | 4.11e-09 |
|                              | atpB         | <i>psa</i>  | Photosystem P700 apoprotein A1                                | -2.47 | 1.09e-55 |
|                              | atpE         | <i>psa</i>  | Photosystem P700 apoprotein A2                                | -2.38 | 3.71e-59 |
|                              | trnF         | <i>psb</i>  | Photosystem II 47kDa protein                                  | -2.17 | 1.56e-4  |
|                              | Pp3c4_510    | <i>ndhN</i> | NAD(P)H-quinone oxidoreductase subunit N, chloroplastic       | -2.70 | 6.73e-27 |
|                              | Pp3c11_23670 | <i>cemA</i> | Chloroplast envelope membrane protein                         | -2.18 | 3.74e-52 |
|                              | Pp3c6_10350  | <i>cao</i>  | Chlorophyllide a oxygenase, chloroplastic                     | -2.02 | 3.53e-12 |

|                      |              |              |                                                      |       |          |
|----------------------|--------------|--------------|------------------------------------------------------|-------|----------|
| Transcription factor | Pp3c2_32400  | <i>erf</i>   | Ethylene-Responsive Transcription Factor RAP 2.11    | 6.39  | 8.19e-60 |
|                      | Pp3c12_11940 | <i>bzip</i>  | bZIP Transcription factor 60                         | 5.28  | 3.7e-60  |
|                      | Pp3c24_19980 | <i>tcp</i>   | Transcription factor TCP15                           | 4.93  | 3.01e-10 |
|                      | Pp3c17_3830  | <i>tcp</i>   | Transcription factor TCP15                           | -2.07 | 2.29e-49 |
|                      | Pp3c8_16240  | <i>bhlh</i>  | Transcription factor bHLH66                          | 4.73  | 2.3e-59  |
|                      | Pp3c3_23910  | <i>myb</i>   | Transcription factor MYB21                           | 4.38  | 8.4e-40  |
|                      | Pp3c6_2730   | <i>hec</i>   | Transcription factor HEC2                            | 3.88  | 4.53e-26 |
|                      | Pp3c17_3860  | <i>marR</i>  | Transcriptional regulator, MarR family               | 3.31  | 8.33e-33 |
|                      | Pp3c3_32210  | <i>eif</i>   | Eukaryotic translation initiation factor 3 subunit K | 3.79  | 1.83e-47 |
|                      | Pp3c18_2960  | <i>eif</i>   | Eukaryotic translation initiation factor 3 subunit C | 3.18  | 2.01e-4  |
|                      | Pp3c10_3550  | <i>tflID</i> | Transcription initiation factor TFIID subunit 14b    | 3.17  | 4.36e-57 |
|                      | Pp3c10_16800 | <i>ap</i>    | AP-1 complex subunit gamma-2                         | 3.15  | 1.21e-22 |
|                      | Pp3c12_25330 | <i>posF</i>  | Probable transcription factor PosF21                 | 3.11  | 9.28e-24 |
|                      | Pp3c15_3560  | <i>eif</i>   | Eukaryotic translation initiation factor 4E-1        | 2.96  | 1.94e-90 |
|                      | Pp3c9_16970  | <i>erf</i>   | Ethylene-Responsive Transcription Factor ERF039      | 2.94  | 7.59e-45 |
|                      | Pp3c22_9050  | <i>asr3</i>  | Trihelix transcription factor ASR3                   | 2.91  | 1.39e-19 |
|                      | Pp3c15_20210 | <i>bzip</i>  | Basic leucine zipper 61                              | 2.81  | 8.32e-13 |

|              |              |                                                      |       |          |
|--------------|--------------|------------------------------------------------------|-------|----------|
| Pp3c6_25090  | <i>mads</i>  | Putative MADS-domain transcription factor            | 2.76  | 4.2e-15  |
| Pp3c23_2252  | <i>mads</i>  | Putative MADS-domain transcription factor            | 2.18  | 8.04e-09 |
| Pp3c3_15040  | <i>ilr</i>   | Transcription factor ILR3                            | 2.51  | 1.53e-09 |
| Pp3c2_18850  | <i>hox</i>   | Homeobox-leucine zipper protein HOX20                | 2.51  | 1.46e-22 |
| Pp3c17_13270 | <i>nf-yb</i> | Nuclear transcription factor Y subunit B-3           | 2.43  | 8.99e-34 |
| Pp3c4_29120  | <i>fama</i>  | Transcription factor FAMA                            | 2.31  | 6.23e-42 |
| Pp3c15_20060 | <i>dof</i>   | DOF zinc finger protein DOF4.3                       | 2.25  | 5.96e-08 |
| Pp3c21_1310  | <i>erf</i>   | Ethylene-Responsive Transcription Factor 3           | 2.23  | 1.84e-08 |
| Pp3c5_24940  | <i>nac</i>   | NAC domain-containing protein 76                     | 2.13  | 7.26e-41 |
| Pp3c7_17000  | <i>lug</i>   | Transcriptional corepressor LEUNIG                   | 2.04  | 4.34e-5  |
| Pp3c2_28350  | <i>ap</i>    | AP-1 complex subunit gamma-2                         | 2.01  | 2.66e-5  |
| Pp3c7_20320  | <i>elo</i>   | Transcription elongation factor B polypeptide 3      | -2.05 | 5.89e-43 |
| Pp3c7_6700   | <i>gamyb</i> | Transcription factor GAMYB                           | -2.06 | 4.42e-5  |
| Pp3c11_12080 | <i>eif</i>   | Eukaryotic translation initiation factor 3 subunit C | -2.14 | 9.75e-70 |
| Pp3c17_20310 | <i>erf</i>   | Ethylene-Responsive Transcription Factor ERF084      | -2.16 | 7.77e-42 |
| Pp3c11_10950 | <i>myb</i>   | MYB family transcription factor PHL7                 | -2.26 | 2.29e-45 |

|                               |              |             |                                                               |       |          |
|-------------------------------|--------------|-------------|---------------------------------------------------------------|-------|----------|
| Ca <sup>2+</sup><br>signaling | Pp3c6_3820   | <i>myb</i>  | Transcription factor<br>MYB3R-5                               | -2.29 | 6.75e-7  |
|                               | Pp3c4_8470   | <i>bhlh</i> | Transcription factor<br>bHLH49                                | -2.36 | 7.29e-77 |
|                               | Pp3c4_1450   | <i>erf</i>  | Ethylene-responsive<br>transcription factor<br>ERF043         | -2.71 | 1.98e-20 |
|                               | Pp3c13_10520 | <i>egl</i>  | Transcription factor<br>EGL1                                  | -2.87 | 2.63e-17 |
|                               | Pp3c20_2980  | <i>nlp</i>  | Protein NLP1                                                  | -2.08 | 9.54e-47 |
|                               | Pp3c19_3900  | <i>nlp</i>  | Protein NLP1                                                  | -3.21 | 4.17e-45 |
|                               | Pp3c27_3620  | <i>crck</i> | Calmodulin-binding<br>receptor-like<br>cytoplasmic kinase 2   | 4.39  | 2.89e-65 |
|                               | Pp3c2_17270  | <i>cpk</i>  | Calcium-dependent<br>protein kinase 26-<br>like               | 4.02  | 8.93e-28 |
|                               | Pp3c10_5660  | <i>calt</i> | Caltractin                                                    | 3.74  | 1.26e-62 |
|                               | Pp3c2_27000  | <i>slo</i>  | Calcium-activated<br>potassium channel<br>slowpoke-like       | 3.18  | 5.75e-27 |
|                               | Pp3c4_27280  | <i>tpc</i>  | Two pore calcium<br>channel protein 1                         | 2.93  | 2.15e-16 |
|                               | Pp3c16_23100 | <i>cpk</i>  | Calcium-dependent<br>protein kinase                           | 2.55  | 6.15e-3  |
|                               | Pp3c26_12710 | <i>aca</i>  | Calcium-<br>transporting ATPase<br>8, plasma<br>membrane-type | 2.39  | 6.02e-13 |
|                               | Pp3c4_22100  | <i>cbl</i>  | Calcineurin B-like<br>protein 3                               | -2.01 | 1.06e-51 |
|                               | Pp3c24_19080 | <i>cas</i>  | Calcium sensing<br>receptor,<br>chloroplastic                 | -2.04 | 7.67e-29 |
